# Supplementary material for: Evaluation of reanalysis soil moisture products using Cosmic Ray Neutron Sensor observations across the globe
Source: Copernicus journal article supplement (doi:10.5194/hess-2023-224), 2023-10-09
Supplement: Supplementary file 1 [file hess-2023-224-supplement.zip]

Archive with 3 entries (3 files):
- 1SM_SuppInfo_YZv7_submit.pdf
- CRNSsiteDataNEW.xlsx
- StatisticMetricNEW.xlsx
