# Supplementary material for: Evaluation of reanalysis soil moisture products using Cosmic Ray Neutron Sensor observations across the globe
Source: Copernicus journal article supplement (doi:10.5194/hess-2023-224), 2023-10-09
Supplement: Supplementary file 1 [file hess-2023-224-supplement.zip › 1SM_SuppInfo_YZv7_submit.pdf]

## **Evaluation of reanalysis soil moisture products using Cosmic Ray Neutron Sensor observations across the globe**

5 Yanchen Zheng<sup>1,2</sup>, Gemma Coxon<sup>1</sup>, Ross Woods<sup>2</sup>, Daniel Power<sup>2</sup>, Miguel Angel Rico-Ramirez<sup>2</sup>, David McJannet<sup>3</sup>,  
Rafael Rosolem<sup>2,4</sup>, Jianzhu Li<sup>5</sup> and Ping Feng<sup>5</sup>

<sup>1</sup>School of Geographical Sciences, University of Bristol, Bristol, UK.

<sup>2</sup>Department of Civil Engineering, University of Bristol, Bristol, UK.

<sup>3</sup>CSIRO Environment, EcoSciences Precinct, Dutton Park, Queensland, Australia.

10 <sup>4</sup>Cabot Institute for the Environment, University of Bristol, Bristol, UK.

<sup>5</sup>State Key Laboratory of Hydraulic Engineering Simulation and Safety, Tianjin University, Tianjin, China.

*Corresponding to:* Yanchen Zheng ([yanchen.zheng@bristol.ac.uk](mailto:yanchen.zheng@bristol.ac.uk))

### **Contents of this file**

15

Text S1 to S9

Figures S1 to S9

Table S1 to S2

### **20 Introduction**

The supporting Information provides additional information and analysis that are not directly related to the main conclusions.

### Text S1. The timeseries comparison for 4 same UK sites from COSMOS-UK and COSMOS-Europe

There are 4 same sites, namely EUSTN, FINCH, LULLN and GLENS, from COSMOS-UK and COSMOS-Europe networks. COSMOS-UK datasets provide both hourly and daily soil moisture data (Evans et al. 2016, Cooper et al. 2021), whereas COSMOS-EU datasets provide the hourly data (Bogena et al. 2022). We first compare timeseries data from two CRNS networks at hourly scale, and then we also aggregate the hourly COSMOS-Europe data to daily scale for the comparison with COSMOS-UK daily data. Figure S1 and Figure S2 display the soil moisture timeseries for these 4 UK sites from two CRNS networks at hourly and daily scale.

In general, the differences of the soil moisture data from two datasets at hourly scale are larger than that of at daily scale. The differences of one site in Scotland named GLENS is large. The hourly data from COSMOS-UK for this site have large variability than that of COSMOS-Europe. Statistical metrics, i.e., bias and Pearson correlation coefficient (R), are adopted to quantify the differences between two networks. The results shows that the bias is smallest for site FINCH at both hourly and daily scale, while the temporal correlation have best performance at site EUSTN. Yet, for site GLENS, the worse performance is notable in terms of bias and R values. The temporal correlation between COSMOS-UK and COSMOS-Europe is less than 0.5 at hourly scale. This deviation highlights the importance of processing harmonized CRNS datasets for the evaluation.

**Table S1.** Statistical metric values for 4 UK sites

| Scale  | Sites | Bias  | R     |
|--------|-------|-------|-------|
| Hourly | EUSTN | -0.01 | 0.956 |
|        | FINCH | 0.01  | 0.880 |
|        | LULLN | 0.03  | 0.856 |
|        | GLENS | 0.06  | 0.447 |
| Daily  | EUSTN | -0.01 | 0.999 |
|        | FINCH | 0.00  | 0.996 |
|        | LULLN | 0.03  | 0.985 |
|        | GLENS | 0.03  | 0.820 |

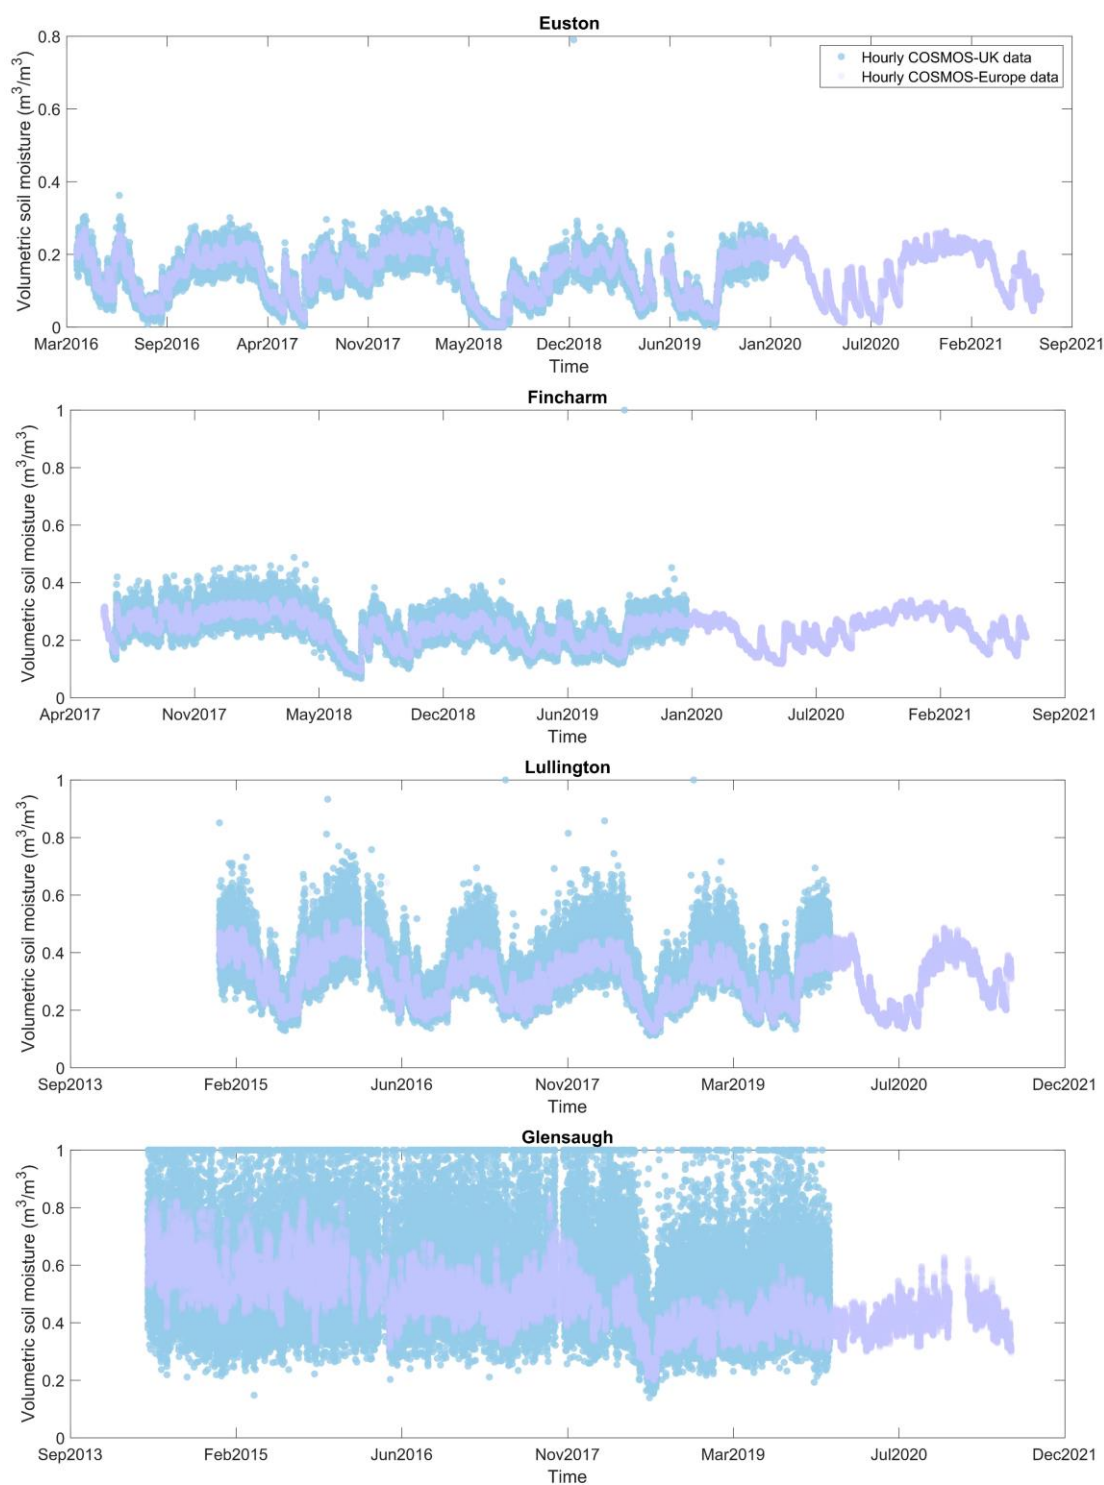

45 **Figure S1.** Soil moisture timeseries comparison for 4 same UK sites from COSMOS-UK and COSMOS-Europe networks at hourly scale

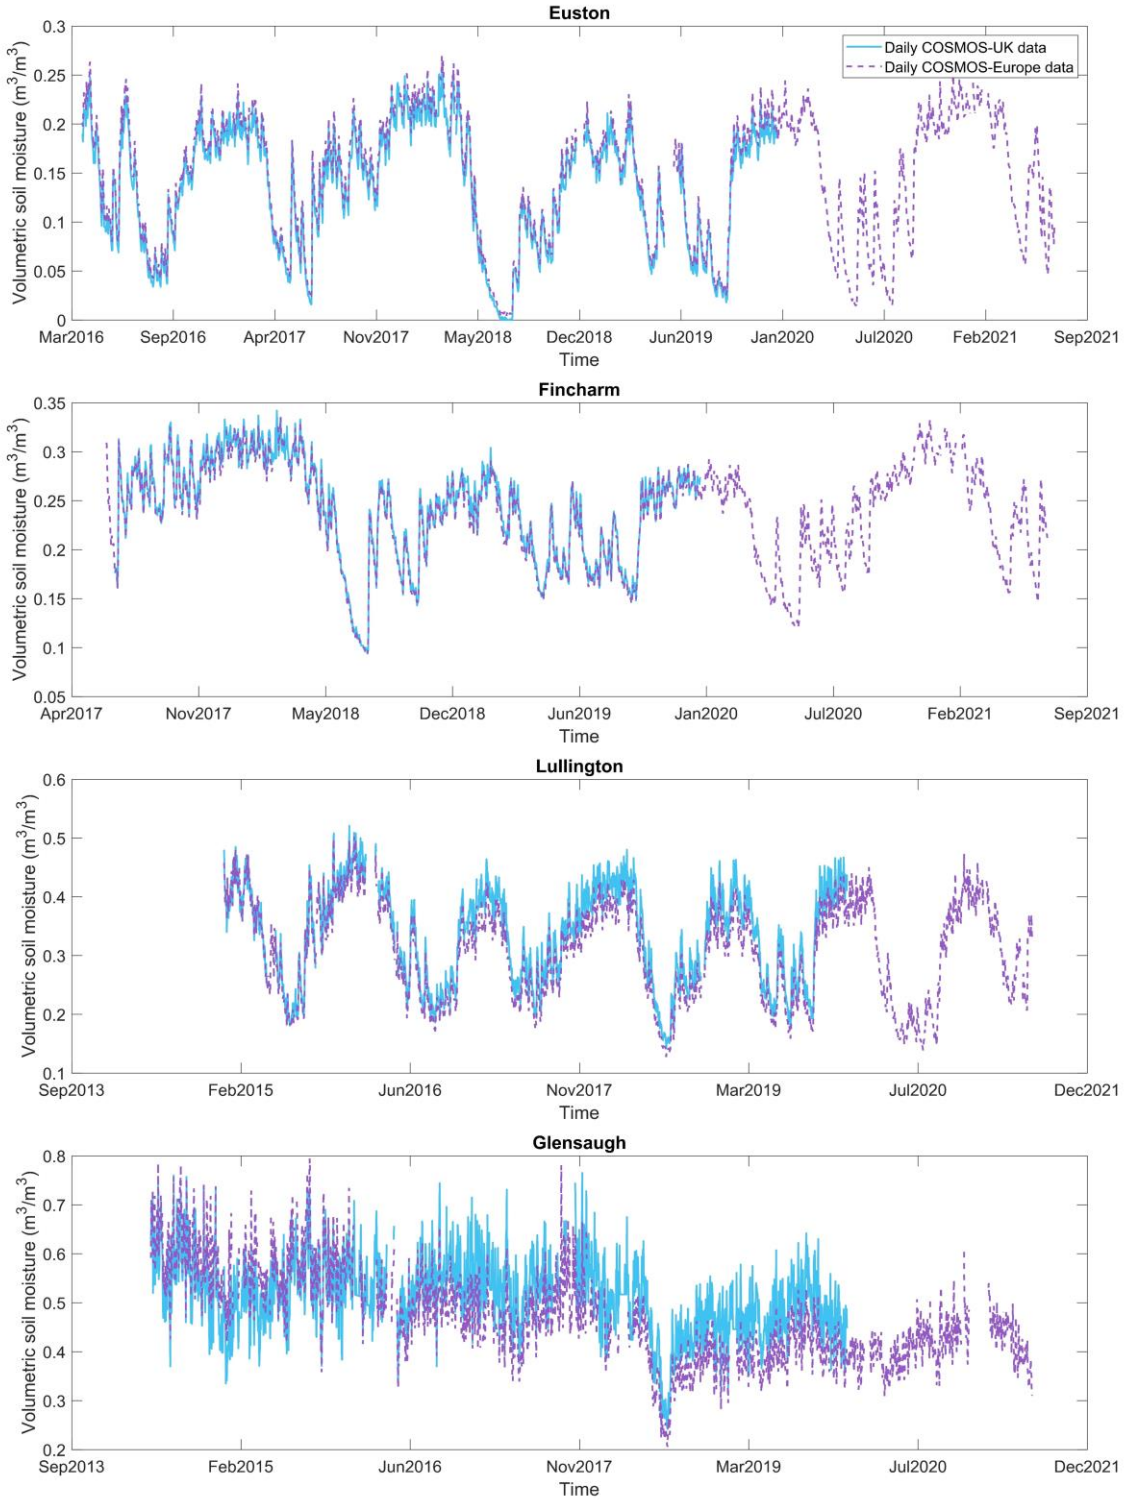

**Figure S2.** Soil moisture timeseries comparison for 4 same UK sites from COSMOS-UK and COSMOS-Europe networks at daily scale

## **Text S2. Reprocessing COSMOS USA and CosmOz data using crspy**

The COSMOS (USA) and CosmOz (Australia) networks have more clear deviations in how they process CRNS data, when compared to COSMOS-UK and COSMOS-EUROPE. To account for this raw CRNS data was collected from the respective networks and reprocessed through crspy (Power et al. 2021) to ensure the soil moisture values came from a comparable methodology. This is indeed possible as both networks maintain and provide raw CRNS data that can be reprocessed if required.

In the case of COSMOS (USA) the network was initially set up without external sensors for temperature and relative humidity. Since the network was established an understanding of the influence atmospheric water vapour has on the neutron counting rate has led to methods to account for this (Rosolem et al. 2013, Köhli et al. 2021). The current standard is to use the Rosolem et al. (2013) method, which requires a method to give an estimate/reading of absolute humidity. As most USA sites do not have external temperature and relative humidity sensors to do this, crspy contains a method to use ERA5-Land data (specifically using temperature\_2m and dewpoint\_temperature\_2m values) to derive absolute humidity estimates. Although ideally in-situ data would lead to more accurate corrections to the neutron signal, it has been shown that using ERA5-Land data is clearly preferable to not correcting for atmospheric water vapour at all (Power et al. 2021). In addition, the development of crspy is motivated by multi-site processing covering the globe, hence the choice of a common global product rather than relying on the availability or not of local/national meteorological monitoring stations.

The CosmOz network was initially set up in the same way as the COSMOS-USA network, without external temperature and relative humidity sensors. In 2016 the original sites had these sensors installed and sites that have been installed since 2016 have in-situ sensors available to correct for atmospheric water vapour. As we were missing sensor data prior to 2016, the decision was made to follow the methodology taken with the COSMOS-USA sites, and all the CosmOz sites were processed using ERA5-Land data to account for atmospheric humidity. Additionally, the CosmOz network uses a different method to account for high energy incoming neutrons (Hawdon et al. 2014). Instead of using the Jungfraujoch station as a reference, with a correction to account for differences in cut-off rigidity between the reference site and the CRNS site, the CosmOz network selects a neutron monitoring site with a similar cut-off rigidity to the CRNS site being corrected. There are arguments about which method is optimal and this requires further research. For the purposes of this study, and to ensure a harmonized processing method, the CosmOz data was reprocessed through crspy with the incoming neutron intensity correction set to match the methods from COSMOS-UK and COSMOS-Europe.

## **Text S3. Detailed descriptions of 7 reanalysis soil moisture products**

### **S3.1 ERA5-Land**

ERA5-Land is an enhanced global dataset for the land component of the fifth generation of European Reanalysis (ERA5) developed by the European Centre for Medium-Range Weather Forecasts (ECMWF). ERA5-Land data is produced through global high-resolution numerical integrations of the ECMWF land surface model driven by the downscale meteorological forcing from the ERA5 climate reanalysis. With enhanced description of the hydrological cycle, especially the soil moisture and lake description, ERA5-Land exhibited better agreement of river discharge estimations compared to available observations (Muñoz-Sabater et al. 2021). The main

95 advantage of ERA5-Land compared to its predecessors (i.e., ERA5 and ERA-Interim dataset) is the finer horizontal resolution. ERA5-Land dataset provides hourly data at a spatial resolution of 0.1° (~9km) on global land surface for more than 70 years, which makes this product widely used (Xu et al. 2022). ERA5-Land data is accessible at <https://www.ecmwf.int/en/era5-land>.

### **S3.2 CFSv2**

100 CFSv2 is the second version of the National Centers for Environmental Prediction (NCEP) Climate Forecast System (CFS). CFS is a fully coupled model simulating the interaction between the Earth's atmosphere, oceans, land and sea ice (Saha et al. 2010), which provides reanalysis data spanning from 1979 to 2010. CFSv2 was upgraded and made operational at NCEP in March 2011. Substantial upgrades to nearly all aspects of the data assimilation and forecast model  
105 components of the system have been made (Saha et al. 2014), with results showing that CFSv2 achieved significant improvement against CFSv1 and better potential in forecasting precipitation, soil moisture values (Yuan et al. 2011, Yuan et al. 2013, Saha et al. 2014). CFSv2 data can be downloaded from <https://rda.ucar.edu/datasets/ds094.1/>.

### **S3.3 MERRA-2**

110 MERRA-2 (GMAO 2015) is the latest version of the global atmospheric reanalysis dataset released by NASA Global Modeling and Assimilation Office (GMAO) using the Goddard Earth Observing System Model (GEOS). Numerous improvements have been made in the assimilation system for producing the MERRA-2 dataset, including the assimilation of modern hyperspectral radiance and microwave observations (Gelaro et al. 2017, Reichle et al. 2017). MERRA-2 is the  
115 first global reanalysis to assimilate aerosol measurements as well as their interaction with other physical process. More details about MERRA-2 can be found from <https://gmao.gsfc.nasa.gov/reanalysis/MERRA-2/>.

### **S3.4 JRA-55**

120 The Japanese 55-year Reanalysis (JRA55) project is launched by the Japan Meteorological Agency in 2010, which is a successor of the Japanese 25-year Reanalysis (JRA25). JRA55 is the first reanalysis product to adopt a four-dimensional variational (4D-Var) analysis as its data assimilation scheme (Kobayashi et al. 2015). Additionally, model spatial resolution, newly available observational data sources and new radiation scheme have been applied in JRA55 to address several deficiencies in JRA25, and to provide a high-quality comprehensive atmospheric  
125 dataset from 1958. The mass concentration of condensed water in the soil ( $\text{kg/m}^3$ ) are available in JRA55, which can be divided by the density of water to acquire the volumetric soil water data. The thickness of each soil layer in JRA55 data varies with the vegetation and land covers type. JRA55 data is given at <https://rda.ucar.edu>.

### **S3.5 GLDAS-Noah**

130 The Global Land Data Assimilation System Version 2 (GLDAS2) is developed by a joint contribution of NASA's Goddard Space Flight Center and NOAA's National Centers for Environmental Prediction (NCEP). GLDAS-Noah v2.1 is driven with a combination of model and observation data. The forcing data include Global Precipitation Climatology Project (GPCP) version 1.3 dataset with 3-4 month latency. GLDAS-Noah v2.1 has been frequently used as a  
135 reference dataset for merging or evaluating satellite soil moisture products (Liu et al. 2011, Kim et al. 2018, Gruber et al. 2020). GLDAS-Noah v2.1 data is available from <https://disc.gsfc.nasa.gov/>.

### S3.6 CRA40

CRA40 is the first-generation global reanalysis product produced by the China Meteorological Administration (CMA). The CRA40 project was launched in 2014 and released data recently (Liu et al. 2017). The CRA40 employs the 3D-Var data assimilation system from GFS/GSI (Global Forecast System/Gridpoint Statistical Interpolation) of NCEP. Multiple source data from conventional observations and satellite products, especially more observations from China and other East Asia regions, have been assimilated into CRA40 reanalysis product (Yu et al. 2021, Zhao et al. 2021). CRA40 can be obtained from <http://data.cma.cn/>.

### S3.7 GLEAM

The Global Land Evaporation Amsterdam Model (GLEAM) estimates the terrestrial evaporation as well as surface and root-zone soil moisture based on satellite forcing data (Miralles et al. 2011, Martens et al. 2017). In particular, the GLEAM v3.5a dataset is based on reanalysis radiation and air temperature, satellite-based vegetation optical depth and a multi-source precipitation product. The GLEAM v3.5a provides daily gridded surface (0-10cm) and root-zone soil moisture data, which is available at <https://www.gleam.eu/>. The soil layer depth of root-zone varies depending on different land cover types.

#### Text S4. List of 135 CRNS sites used in this study

General information, including geographic locations, elevation, land cover type and start date, of 135 CRNS sites selected in this study is summarized in Table S2. The detailed data for each site including climate, soil properties and slope is provided in the 'CRNSsiteData.xlsx' of the supplementary files.

#### Text S5. Comparison results of three vertical scale mismatch processing methods

Three different methods are tested to solve the vertical mismatch between CRNS measurements and reanalysis products. The details of these three methods are listed as follows:

- V1: Only select the soil moisture data of the layer where D86 (see definition from (Köhli et al. 2015)) is located;

- V2: Equally average of all the soil layers up to D86;

- V3: Assign weights to all the soil layers up to D86.

The formula for calculating the vertical weights in V3 method can be found in section 3.1.3 of the main paper.

In general, the calculated soil moisture data for almost all sites by using V2 and V3 are highly similar to each other. Taking one UK site, i.e., EUSTN, as an example, Figure S3a compares the soil moisture timeseries data for three vertical processing methods from ERA5-Land and CRNS observations. The table (Figure S3b) shows the performance quantified by R and RMSE values. It is clear that soil moisture timeseries processed by V1 exhibit worse performance on both statistical metrics. The extracted reanalysis soil moisture series by using V2 and V3 present better temporal dynamic than that of V1, especially in the dry condition.

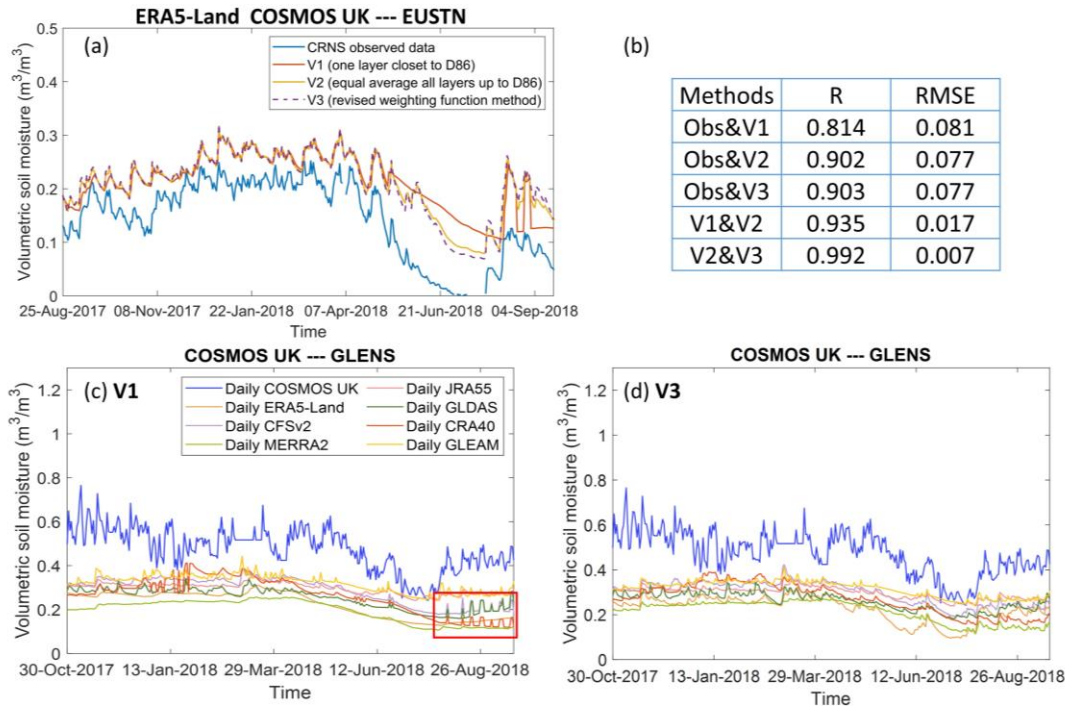

**Figure S3.** Comparison results for three different vertical processing methods.

Figure 3c, d display the processed soil moisture daily timeseries from all reanalysis products and CRNS measurements at GLENS UK site under V1 and V3 method, respectively. As for V1 method, since the selection of soil layers varies with the D86 at each time step, the abrupt change in selecting different soil layers leads to several spikes in soil moisture timeseries data. In contrast, the soil moisture timeseries from V3 method exhibit natural variations against CRNS measurements.

# **Text S6. Performance of reanalysis products summarized in boxplots for 6 statistical metrics**

Performance of the 7 SM reanalysis products in terms of 6 statistical metrics for 4 different regions are summarized in boxplots (Figure S4 and Figure S5). The recommended top two products are showed in green colour, while the red boxes represent the products with the worst performance. The rest of the products are displayed in yellow colour. Overall, the performance of reanalysis products varies across different regions.

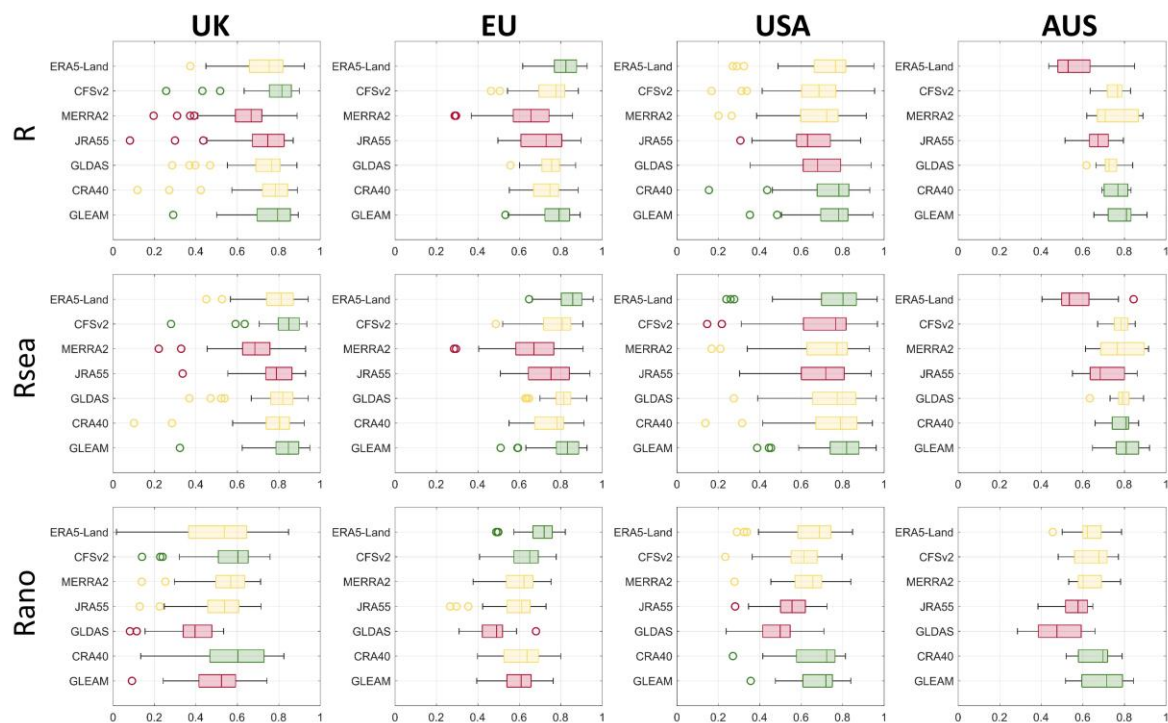

**Figure S4.** Performance of the 7 SM reanalysis products in terms of  $R$ ,  $R_{sea}$  and  $R_{ano}$  statistical metrics for 4 regions.

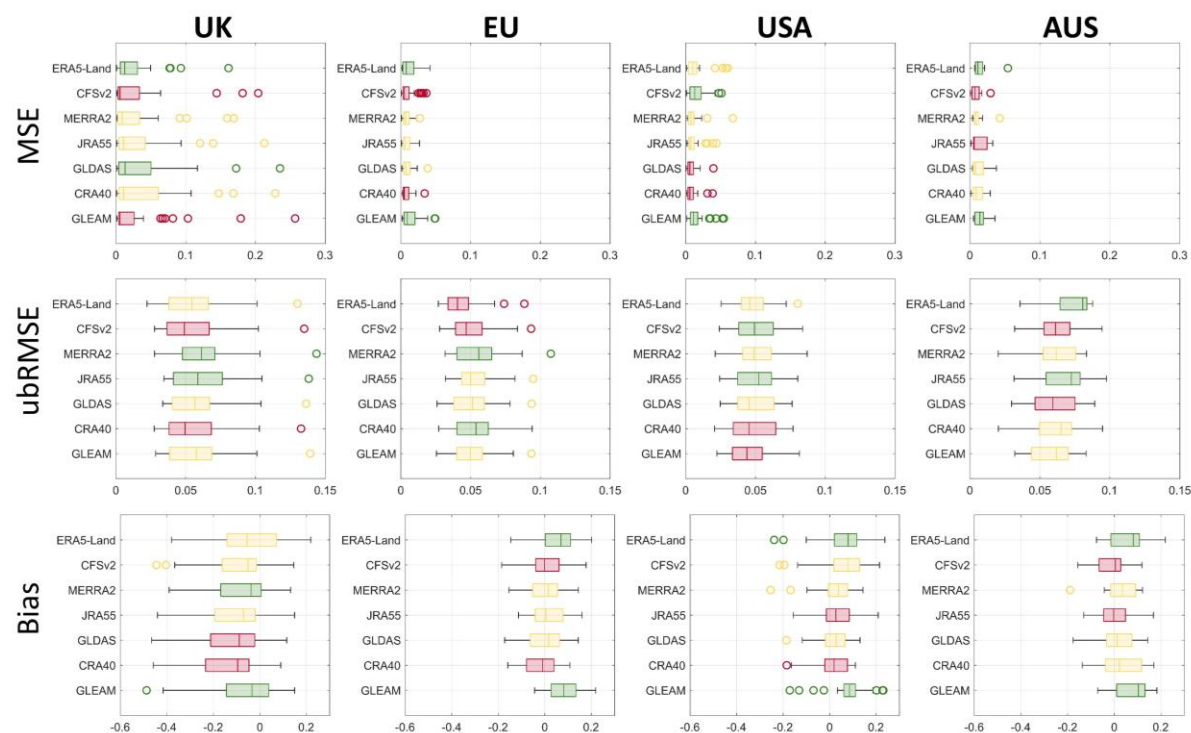

**Figure S5.** Performance of the 7 SM reanalysis products in terms of  $MSE$ ,  $ubRMSE$  and  $Bias$  statistical metrics for 4 regions.

## Text S7. Average Brunke ranking scores for 7 reanalysis SM products

The derived statistic metric for each site across different products are provided in ‘StatisticMetric.xlsx’ of the supplementary files. Table S3 presents the average Brunke ranking scores for 7 reanalysis SM products under various regions, climate, land cover and topographic slope conditions. Details of how to calculate the average Brunke ranking scores are presented in section 3.3 of the main paper.

**Table S3.** Average Brunke ranking scores for 7 reanalysis SM products.

| Class      | Type                 | ERA5-Land   | CFSvs2      | MERRA2      | JRA55       | GLDAS-Noah  | CRA40       | GLEAM       |
|------------|----------------------|-------------|-------------|-------------|-------------|-------------|-------------|-------------|
| Region     | UK (45 sites)        | 3.57        | <b>2.99</b> | 4.36        | 4.35s       | <u>4.62</u> | 3.79        | <b>3.49</b> |
|            | EU (41 sites)        | <b>2.64</b> | 3.64        | <u>4.87</u> | 4.15        | 4.29        | 4.00        | 3.89        |
|            | USA (38 sites)       | 3.71        | <u>4.73</u> | 4.03        | 4.46        | 4.34        | <b>3.11</b> | <b>3.47</b> |
|            | AUS (11 sites)       | <u>5.15</u> | <b>3.00</b> | 3.64        | 4.61        | 4.11        | 3.53        | <b>3.29</b> |
| Climate    | Humid (53 sites)     | <b>2.93</b> | <b>3.34</b> | <u>4.65</u> | 3.96        | 4.51        | 4.19        | 3.72        |
|            | Balanced (42 sites)  | 3.70        | <b>3.48</b> | <u>4.56</u> | 4.43        | 4.32        | 3.56        | 3.62        |
|            | Arid (40 sites)      | 3.91        | 4.44        | 3.78        | <u>4.73</u> | 4.33        | <b>2.99</b> | <b>3.38</b> |
| Land cover | Forest (33 sites)    | 3.58        | 4.21        | 4.24        | 4.20        | <u>4.30</u> | <b>3.12</b> | 3.81        |
|            | Cropland (41 sites)  | <b>3.29</b> | 3.68        | <u>4.68</u> | 4.12        | 4.35        | 3.91        | 3.57        |
|            | Shrubland (20 sites) | 3.83        | 4.06        | 3.89        | 4.63        | <u>4.65</u> | <b>3.30</b> | <b>2.97</b> |
|            | Grassland (41 sites) | <b>3.36</b> | <b>3.14</b> | 4.37        | <u>4.55</u> | 4.41        | 3.90        | 3.72        |
| Slope      | Steep (55 sites)     | <b>3.49</b> | 3.64        | 4.29        | 4.31        | <u>4.42</u> | <b>3.49</b> | 3.68        |
|            | Flat (80 sites)      | <b>3.44</b> | 3.74        | <u>4.41</u> | 4.37        | 4.39        | 3.72        | 3.52        |

Note: The bold numbers in green represent the relatively good performance with the Brunke ranking scores <3.5 (**recommended**), numbers with light green shading denote its Brunke ranking scores within 3 (**highly recommended**). The numbers in red with underline indicate the worst performance across all reanalysis products (**not recommended**).

## Text S8. Spatial map of average statistical metrics performance of all 7 products

Figure S6 and S7 provide the spatial map of average all 7 products performance in terms of *Rsea*, *Rano* and *MSE*, *ubRMSE*, respectively. The spatial distribution of *Rsea* is similar with that of *R*. The performance of *Rano* is generally worse than the correlation of original and seasonal SM time series. No clear spatial pattern is observed in the USA and Australia in terms of *MSE* and *ubRMSE*, while several sites with high *MSE* and *ubRMSE* values are notable in the UK.

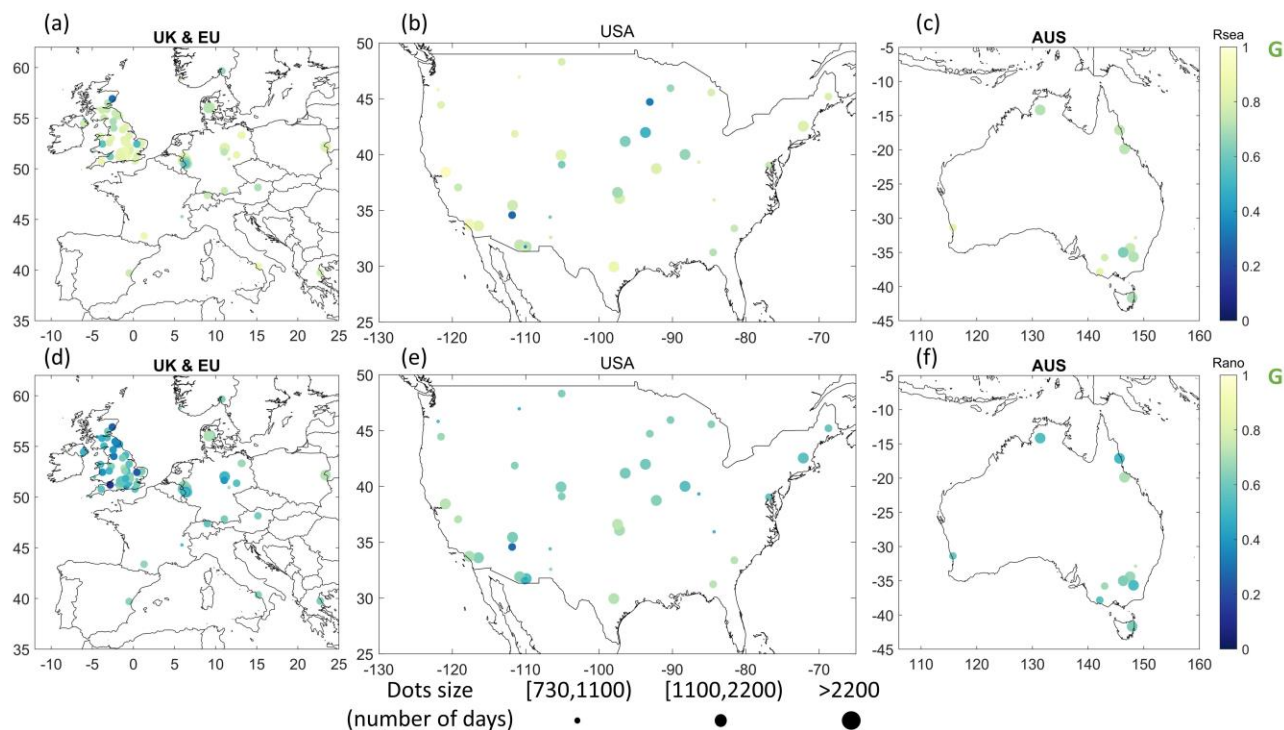

**Figure S6.** Spatial distribution of average statistical metrics  $R_{sea}$  and  $R_{ano}$  performance of all 7 products. The green letter G denotes the statistical metric values with good performance.

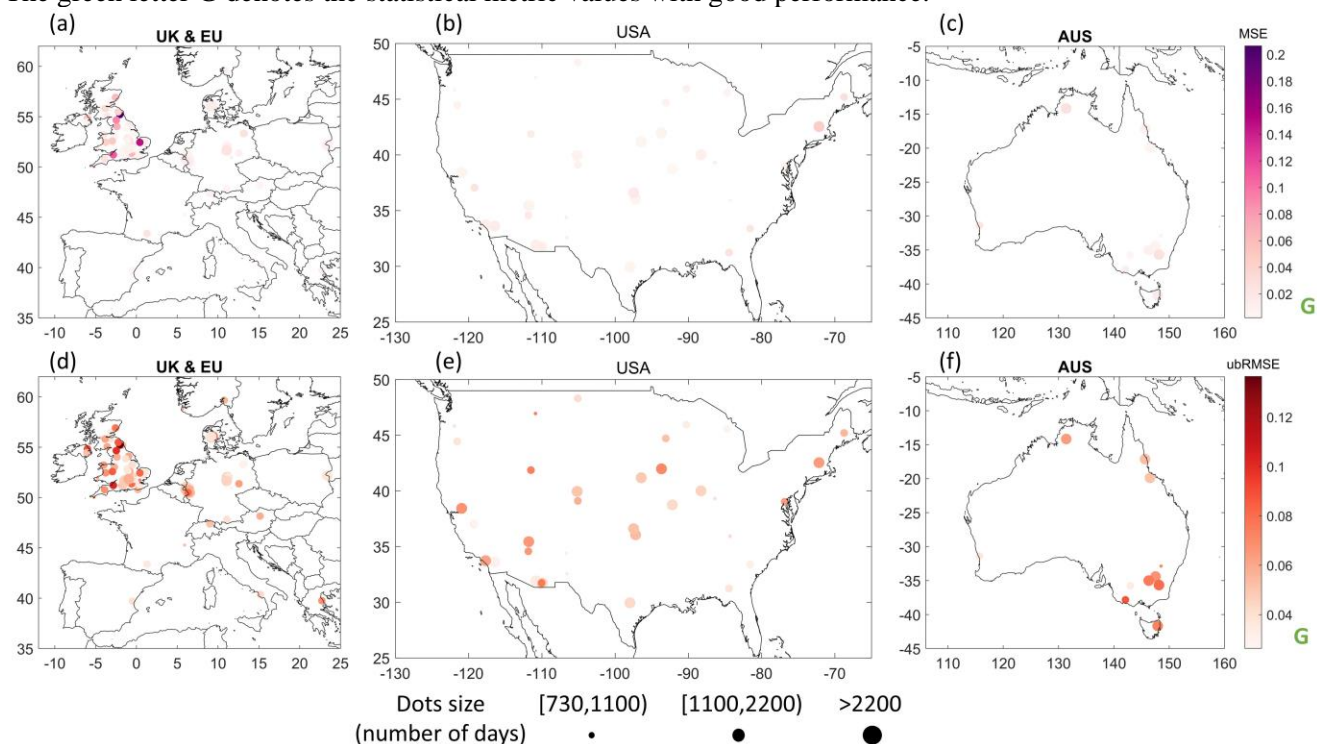

**Figure S7.** Spatial distribution of average statistical metrics  $MSE$  and  $ubRMSE$  performance of all 7 products. The green letter G denotes the statistical metric values with good performance.

## Text S9. The performance of 6 statistical metrics under various soil properties

Figure S8 presents the spatial map of bulk density and soil organic carbon for CRNS sites used in this study. Most of the sites with low bulk density and high soil organic carbon are from the UK. Figure S9 demonstrates that all statistical metrics have worse performance in the sites with low bulk density and high soil organic carbon.

235

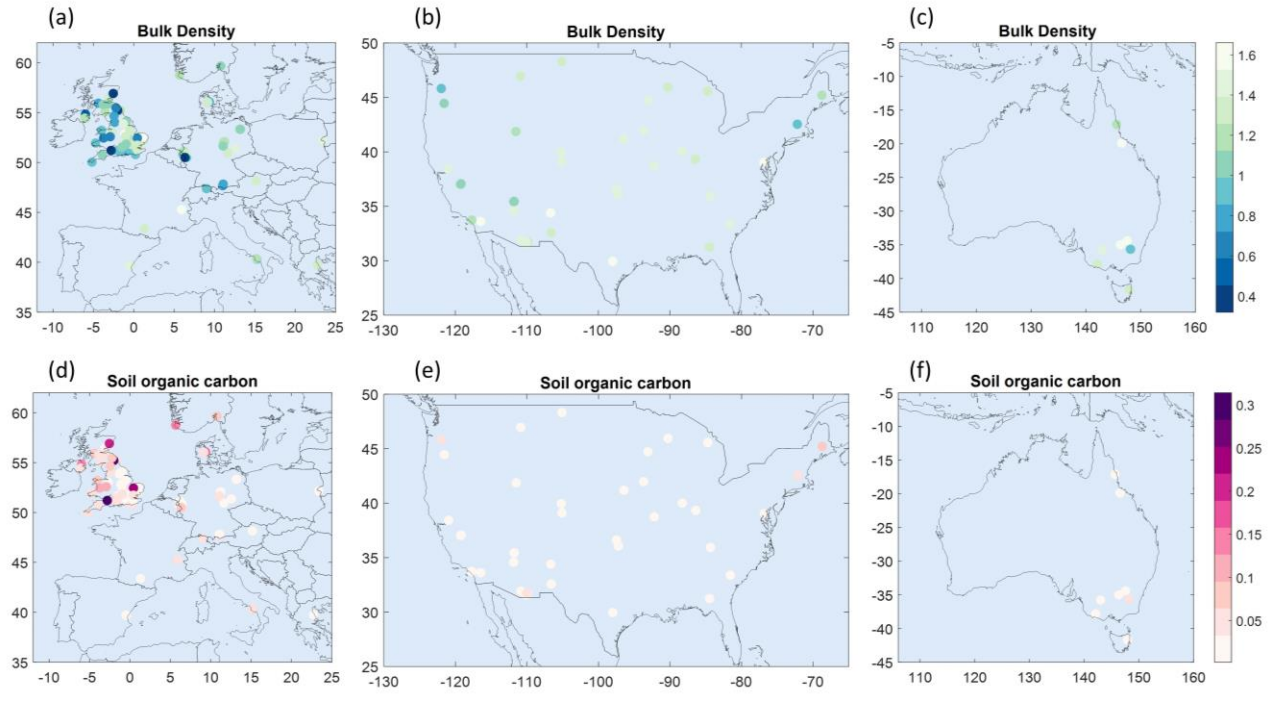

**Figure S8.** Spatial map of bulk density and soil organic carbon for CRNS sites used in this study.

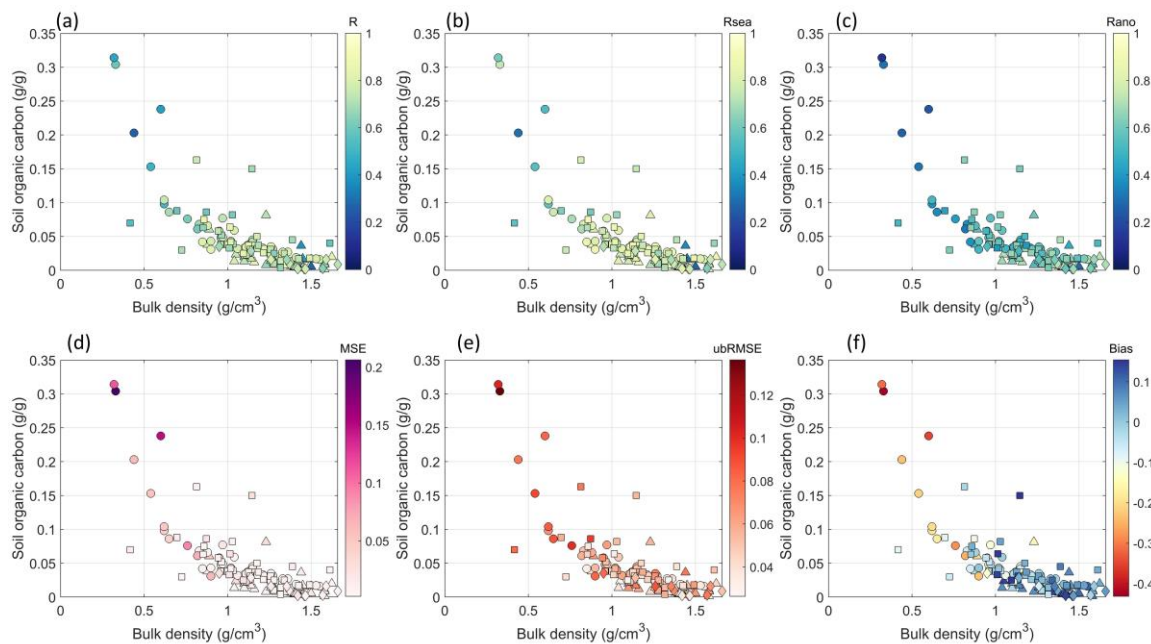

**Figure S9.** Statistical metrics performance under various bulk density and soil organic carbon conditions. The shape of the dots represents the CRNS sites from different networks (UK: circle; Europe: square; USA: triangle; Australia: diamond).

## References:

- Bogena, H. R., M. Schrön, J. Jakobi, P. Ney, S. Zacharias, M. Andreassen, R. Baatz, D. Boorman, M. B. Duygu and M. A. Eguibar-Galán (2022). "COSMOS-Europe: a European network of cosmic-ray neutron soil moisture sensors." *Earth System Science Data* **14**(3): 1125-1151.
- Cooper, H. M., E. Bennett, J. Blake, E. Blyth, D. Boorman, E. Cooper, J. Evans, M. Fry, A. Jenkins and R. Morrison (2021). "COSMOS-UK: national soil moisture and hydrometeorology data for environmental science research." *Earth System Science Data* **13**(4): 1737-1757.
- Evans, J., H. Ward, J. Blake, E. Hewitt, R. Morrison, M. Fry, L. Ball, L. Doughty, J. Libre and O. Hitt (2016). "Soil water content in southern England derived from a cosmic - ray soil moisture observing system - COSMOS - UK." *Hydrological Processes* **30**(26): 4987-4999.
- Gelaro, R., W. McCarty, M. J. Suárez, R. Todling, A. Molod, L. Takacs, C. A. Randles, A. Darmenov, M. G. Bosilovich and R. Reichle (2017). "The modern-era retrospective analysis for research and applications, version 2 (MERRA-2)." *Journal of climate* **30**(14): 5419-5454.
- GMAO, G. M. a. A. O. (2015). "MERRA-2 tavgM\_2d\_lnd\_Nx: 2d,Monthly mean,Time-Averaged,Single-Level,Assimilation,Land Surface Diagnostics V5.12.4, Greenbelt, MD, USA." *Goddard Earth Sciences Data and Information Services Center (GES DISC)*(Accessed: 18 April 2022, 10.5067/8S35XF81C28F).
- Gruber, A., G. De Lannoy, C. Albergel, A. Al-Yaari, L. Brocca, J.-C. Calvet, A. Colliander, M. Cosh, W. Crow and W. Dorigo (2020). "Validation practices for satellite soil moisture retrievals: What are (the) errors?" *Remote sensing of environment* **244**: 111806.
- Hawdon, A., D. McJannet and J. Wallace (2014). "Calibration and correction procedures for cosmic - ray neutron soil moisture probes located across Australia." *Water Resources Research* **50**(6): 5029-5043.
- Kim, H., R. Parinussa, A. G. Konings, W. Wagner, M. H. Cosh, V. Lakshmi, M. Zohaib and M. Choi (2018). "Global-scale assessment and combination of SMAP with ASCAT (active) and AMSR2 (passive) soil moisture products." *Remote Sensing of Environment* **204**: 260-275.
- Kobayashi, S., Y. Ota, Y. Harada, A. Ebata, M. Moriya, H. Onoda, K. Onogi, H. Kamahori, C. Kobayashi and H. Endo (2015). "The JRA-55 reanalysis: General specifications and basic characteristics." *Journal of the Meteorological Society of Japan. Ser. II* **93**(1): 5-48.
- Köhli, M., M. Schrön, M. Zreda, U. Schmidt, P. Dietrich and S. Zacharias (2015). "Footprint characteristics revised for field - scale soil moisture monitoring with cosmic - ray neutrons." *Water Resources Research* **51**(7): 5772-5790.
- Köhli, M., J. Weimar, M. Schrön, R. Baatz and U. Schmidt (2021). "Soil moisture and air humidity dependence of the above-ground cosmic-ray neutron intensity." *Frontiers in Water* **2**: 66.
- Liu, Y. Y., R. M. Parinussa, W. A. Dorigo, R. A. M. De Jeu, W. Wagner, A. I. J. M. van Dijk, M. F. McCabe and J. P. Evans (2011). "Developing an improved soil moisture dataset by blending passive and active microwave satellite-based retrievals." *Hydrol. Earth Syst. Sci.* **15**(2): 425-436.
- Liu, Z., C. Shi, Z. Zhou, L. Jiang, X. Liang, T. Zhang, J. Liao, J. Liu, M. Wang and S. Yao (2017). CMA global reanalysis (CRA-40): Status and plans. Proc. 5th International Conference on Reanalysis, Nat. Meteor. Int. Canter.

285 Martens, B., D. G. Miralles, H. Lievens, R. v. d. Schalie, R. A. De Jeu, D. Fernández-Prieto, H.  
E. Beck, W. A. Dorigo and N. E. Verhoest (2017). "GLEAM v3: Satellite-based land evaporation  
and root-zone soil moisture." *Geoscientific Model Development* **10**(5): 1903-1925.

Miralles, D., R. De Jeu, J. Gash, T. Holmes and A. Dolman (2011). "Magnitude and variability of  
land evaporation and its components at the global scale." *Hydrology and Earth System Sciences*  
**15**(3): 967-981.

290 Muñoz-Sabater, J., E. Dutra, A. Agustí-Panareda, C. Albergel, G. Arduini, G. Balsamo, S.  
Boussetta, M. Choulga, S. Harrigan and H. Hersbach (2021). "ERA5-Land: A state-of-the-art  
global reanalysis dataset for land applications." *Earth System Science Data* **13**(9): 4349-4383.

Power, D., M. A. Rico-Ramirez, S. Desilets, D. Desilets and R. Rosolem (2021). "Cosmic-Ray  
neutron Sensor PYthon tool (crspy 1.2.1): an open-source tool for the processing of cosmic-ray  
295 neutron and soil moisture data." *Geosci. Model Dev.* **14**(12): 7287-7307.

Reichle, R. H., C. S. Draper, Q. Liu, M. Girotto, S. P. P. Mahanama, R. D. Koster and G. J. M.  
De Lannoy (2017). "Assessment of MERRA-2 Land Surface Hydrology Estimates." *Journal of*  
*Climate* **30**(8): 2937-2960.

Rosolem, R., W. Shuttleworth, M. Zreda, T. E. Franz, X. Zeng and S. Kurc (2013). "The effect of  
300 atmospheric water vapor on neutron count in the cosmic-ray soil moisture observing system."  
*Journal of Hydrometeorology* **14**(5): 1659-1671.

Saha, S., S. Moorthi, H.-L. Pan, X. Wu, J. Wang, S. Nadiga, P. Tripp, R. Kistler, J. Woollen and  
D. Behringer (2010). "The NCEP climate forecast system reanalysis." *Bulletin of the American*  
*Meteorological Society* **91**(8): 1015-1058.

305 Saha, S., S. Moorthi, X. Wu, J. Wang, S. Nadiga, P. Tripp, D. Behringer, Y.-T. Hou, H.-y.  
Chuang and M. Iredell (2014). "The NCEP climate forecast system version 2." *Journal of climate*  
**27**(6): 2185-2208.

Xu, J., Z. Ma, S. Yan and J. Peng (2022). "Do ERA5 and ERA5-land precipitation estimates  
outperform satellite-based precipitation products? A comprehensive comparison between state-  
310 of-the-art model-based and satellite-based precipitation products over mainland China." *Journal*  
*of Hydrology* **605**: 127353.

Yu, X., L. Zhang, T. Zhou and J. Liu (2021). "The Asian Subtropical Westerly Jet Stream in  
CRA-40, ERA5, and CFSR Reanalysis Data: Comparative Assessment." *Journal of*  
*Meteorological Research* **35**(1): 46-63.

315 Yuan, X., E. F. Wood, L. Luo and M. Pan (2011). "A first look at Climate Forecast System  
version 2 (CFSv2) for hydrological seasonal prediction." *Geophysical research letters* **38**(13).

Yuan, X., E. F. Wood, J. K. Roundy and M. Pan (2013). "CFSv2-based seasonal hydroclimatic  
forecasts over the conterminous United States." *Journal of Climate* **26**(13): 4828-4847.

Zhao, D., L. Zhang, T. Zhou and J. Liu (2021). "Contributions of Local and Remote Atmospheric  
320 Moisture Fluxes to East China Precipitation Estimated from CRA-40 Reanalysis." *Journal of*  
*Meteorological Research* **35**(1): 32-45.

323 **Table S2.** List of the 135 CRNS sites used in this study.

| CRNS site name       | Station ID   | Country | Latitude | Longitude | Elevation (m) | Reclassified land cover | Start date |
|----------------------|--------------|---------|----------|-----------|---------------|-------------------------|------------|
| Manitou Forest Tower | USA_SITE_004 | USA     | 39.10    | -105.10   | 2411          | Forest                  | 10/2009    |
| Marshall Colorado    | USA_SITE_006 | USA     | 39.95    | -105.20   | 1756          | Cropland                | 10/2009    |
| Kendall              | USA_SITE_010 | USA     | 31.74    | -109.94   | 1548          | Shrubland               | 06/2010    |
| Santa Rita Creosote  | USA_SITE_011 | USA     | 31.91    | -110.84   | 989           | Shrubland               | 06/2010    |
| SMAP-OK              | USA_SITE_014 | USA     | 36.06    | -97.22    | 326           | Grassland               | 07/2010    |
| ARM-1                | USA_SITE_015 | USA     | 36.61    | -97.49    | 322           | Cropland                | 07/2010    |
| Iowa Validation Site | USA_SITE_016 | USA     | 41.98    | -93.68    | 316           | Cropland                | 09/2010    |
| San Pedro 2          | USA_SITE_020 | USA     | 31.56    | -110.14   | 1233          | Shrubland               | 01/2011    |
| Desert Chaparral UCI | USA_SITE_023 | USA     | 33.61    | -116.45   | 1292          | Shrubland               | 03/2011    |
| Coastal Sage UCI     | USA_SITE_024 | USA     | 33.73    | -117.70   | 320           | Shrubland               | 03/2011    |
| Chestnut Ridge NOAA  | USA_SITE_025 | USA     | 35.93    | -84.33    | 370           | Forest                  | 03/2011    |
| Bondville            | USA_SITE_026 | USA     | 40.01    | -88.29    | 219           | Cropland                | 03/2011    |
| Morgan Monroe        | USA_SITE_027 | USA     | 39.32    | -86.41    | 275           | Forest                  | 03/2011    |
| Mozark               | USA_SITE_028 | USA     | 38.74    | -92.20    | 219           | Forest                  | 04/2011    |
| Neb Field 3          | USA_SITE_029 | USA     | 41.18    | -96.44    | 363           | Cropland                | 04/2011    |
| Harvard Forest       | USA_SITE_030 | USA     | 42.54    | -72.17    | 350           | Forest                  | 05/2011    |
| Howland              | USA_SITE_031 | USA     | 45.20    | -68.74    | 124           | Forest                  | 05/2011    |
| Tonzi Ranch          | USA_SITE_032 | USA     | 38.43    | -120.97   | 177           | Shrubland               | 05/2011    |
| Soaproot             | USA_SITE_033 | USA     | 37.03    | -119.26   | 1160          | Forest                  | 06/2011    |
| P301                 | USA_SITE_034 | USA     | 37.07    | -119.19   | 2014          | Forest                  | 06/2011    |
| Wind River           | USA_SITE_035 | USA     | 45.82    | -121.95   | 371           | Forest                  | 06/2011    |
| Hauser Farm South    | USA_SITE_037 | USA     | 34.58    | -111.86   | 942           | Cropland                | 06/2011    |
| Metolius             | USA_SITE_038 | USA     | 44.45    | -121.56   | 1253          | Forest                  | 06/2011    |
| Rosemount            | USA_SITE_041 | USA     | 44.71    | -93.09    | 260           | Cropland                | 07/2011    |
| Park Falls           | USA_SITE_042 | USA     | 45.95    | -90.27    | 470           | Forest                  | 07/2011    |
| UMBS                 | USA_SITE_043 | USA     | 45.56    | -84.71    | 220           | Forest                  | 07/2011    |

|                         |              |     |       |         |      |           |         |
|-------------------------|--------------|-----|-------|---------|------|-----------|---------|
| Daniel Forest           | USA_SITE_046 | USA | 41.87 | -111.51 | 2600 | Forest    | 08/2011 |
| Tenderfoot Creek        | USA_SITE_047 | USA | 46.95 | -110.89 | 2255 | Forest    | 08/2011 |
| Fort Peck               | USA_SITE_048 | USA | 48.31 | -105.10 | 634  | Grassland | 08/2011 |
| JERC                    | USA_SITE_052 | USA | 31.24 | -84.46  | 40   | Forest    | 09/2011 |
| Savannah River          | USA_SITE_053 | USA | 33.38 | -81.57  | 94   | Forest    | 09/2011 |
| Freeman Ranch           | USA_SITE_057 | USA | 29.95 | -98.00  | 265  | Forest    | 10/2011 |
| Sevilleta New Grass     | USA_SITE_058 | USA | 34.40 | -106.67 | 1566 | Shrubland | 02/2012 |
| Lucky Hills             | USA_SITE_060 | USA | 31.74 | -110.05 | 1367 | Shrubland | 03/2012 |
| Flag Wildfire           | USA_SITE_061 | USA | 35.45 | -111.77 | 2313 | Shrubland | 04/2012 |
| Flag Ponderosa Pine     | USA_SITE_062 | USA | 35.44 | -111.80 | 2381 | Forest    | 04/2012 |
| Beltsville              | USA_SITE_065 | USA | 39.03 | -76.85  | 42   | Grassland | 04/2012 |
| Jornada Mixed Shrubland | USA_SITE_072 | USA | 32.58 | -106.60 | 0    | Shrubland | 01/2013 |
| AliceHolt               | ALIC1        | UK  | 51.15 | -0.86   | 80   | Forest    | 06/2015 |
| Balruddery              | BALRD        | UK  | 56.48 | -3.11   | 130  | Cropland  | 05/2014 |
| BickleyHall             | BICKL        | UK  | 53.03 | -2.70   | 78   | Grassland | 01/2015 |
| BunnyPark               | BUNNY        | UK  | 52.86 | -1.13   | 39   | Cropland  | 01/2015 |
| Cardington              | CARDT        | UK  | 52.11 | -0.42   | 29   | Cropland  | 06/2015 |
| ChimneyMeadows          | CHIMN        | UK  | 51.71 | -1.48   | 65   | Grassland | 02/2013 |
| ChobhamCommon           | CHOBH        | UK  | 51.37 | -0.60   | 47   | Forest    | 02/2015 |
| Cochno                  | COCHN        | UK  | 55.94 | -4.40   | 168  | Grassland | 08/2017 |
| CocklePark              | COCLP        | UK  | 55.22 | -1.69   | 87   | Cropland  | 11/2014 |
| Crichton                | CRICH        | UK  | 55.04 | -3.58   | 42   | Grassland | 02/2014 |
| CwmGarw                 | CGARW        | UK  | 51.95 | -4.75   | 299  | Grassland | 06/2016 |
| EasterBush              | EASTB        | UK  | 55.87 | -3.21   | 208  | Grassland | 08/2014 |
| Elmsett                 | ELMST        | UK  | 52.09 | 0.99    | 76   | Cropland  | 11/2016 |
| Euston                  | EUSTN        | UK  | 52.34 | 0.80    | 18   | Cropland  | 03/2016 |
| Fincham                 | FINCH        | UK  | 52.62 | 0.51    | 15   | Cropland  | 07/2017 |
| GisburnForest           | GISBN        | UK  | 54.02 | -2.38   | 246  | Forest    | 08/2014 |
| Glensaugh               | GLENS        | UK  | 56.91 | -2.56   | 399  | Shrubland | 05/2014 |

|                 |        |        |       |       |     |           |         |
|-----------------|--------|--------|-------|-------|-----|-----------|---------|
| Glenwherry      | GLENW  | UK     | 54.84 | -6.00 | 274 | Grassland | 06/2016 |
| Hadlow          | HADLW  | UK     | 51.23 | 0.32  | 33  | Cropland  | 10/2016 |
| HartwoodHome    | HARTW  | UK     | 55.81 | -3.83 | 225 | Grassland | 05/2014 |
| HarwoodForest   | HARWD  | UK     | 55.22 | -2.02 | 300 | Forest    | 05/2015 |
| HenfaesFarm     | HENFS  | UK     | 53.23 | -4.01 | 287 | Shrubland | 12/2015 |
| Heytesbury      | HYBRY  | UK     | 51.20 | -2.08 | 166 | Grassland | 08/2017 |
| Hillsborough    | HILLB  | UK     | 54.45 | -6.07 | 146 | Grassland | 06/2016 |
| HollinHill      | HOLLN  | UK     | 54.11 | -0.96 | 82  | Cropland  | 03/2014 |
| Loddington      | LODTN  | UK     | 52.61 | -0.83 | 186 | Cropland  | 04/2016 |
| LullingtonHeath | LULLN  | UK     | 50.79 | 0.19  | 119 | Grassland | 12/2014 |
| MoorHouse       | MOORH  | UK     | 54.66 | -2.47 | 565 | Grassland | 04/2014 |
| Morley          | MORLY  | UK     | 52.55 | 1.03  | 55  | Cropland  | 05/2014 |
| NorthWyke       | NWYKE  | UK     | 50.77 | -3.91 | 181 | Grassland | 10/2014 |
| Plynlimon       | PLYNL  | UK     | 52.45 | -3.76 | 542 | Grassland | 05/2014 |
| PortonDown      | PORTN  | UK     | 51.12 | -1.68 | 146 | Grassland | 12/2014 |
| Redhill         | REDHL  | UK     | 51.26 | 0.43  | 91  | Grassland | 02/2016 |
| Redmere         | RDMER  | UK     | 52.45 | 0.42  | 3   | Shrubland | 10/2015 |
| Riseholme       | RISEH  | UK     | 53.26 | -0.53 | 53  | Grassland | 04/2016 |
| Rothamsted      | ROTHD  | UK     | 51.81 | -0.38 | 131 | Cropland  | 07/2014 |
| Sheepdrove      | SHEEP  | UK     | 51.53 | -1.48 | 170 | Cropland  | 10/2013 |
| Sourhope        | SOURH  | UK     | 55.48 | -2.23 | 487 | Grassland | 11/2014 |
| SpenFarm        | SPENF  | UK     | 53.87 | -1.32 | 57  | Cropland  | 11/2016 |
| Stiperstones    | STIPS  | UK     | 52.58 | -2.94 | 432 | Grassland | 06/2014 |
| Stoughton       | STGHT  | UK     | 52.60 | -1.05 | 130 | Cropland  | 08/2015 |
| TadhamMoor      | TADHM  | UK     | 51.21 | -2.83 | 7   | Grassland | 10/2014 |
| TheLizard       | LIZRD  | UK     | 50.03 | -5.20 | 85  | Shrubland | 10/2014 |
| Waddesdon       | WADDN  | UK     | 51.84 | -0.95 | 98  | Grassland | 04/2013 |
| Writtle         | WRTTL  | UK     | 51.73 | 0.42  | 44  | Cropland  | 04/2017 |
| Aas             | AAC001 | Norway | 59.66 | 10.76 | 72  | Grassland | 09/2016 |

|                |            |             |       |       |      |           |         |
|----------------|------------|-------------|-------|-------|------|-----------|---------|
| Acheleschwaig  | ACC001     | Germany     | 47.67 | 10.99 | 867  | Grassland | 06/2017 |
| Agia           | AGCK003    | Greece      | 39.76 | 22.72 | 1032 | Shrubland | 03/2017 |
| Alento1        | ALC001     | Italy       | 40.31 | 15.23 | 671  | Forest    | 02/2016 |
| Alento2        | ALC002     | Italy       | 40.37 | 15.18 | 453  | Cropland  | 02/2016 |
| Calderona1     | CAC001     | Spain       | 39.71 | -0.46 | 785  | Shrubland | 10/2016 |
| Crolles        | CRC001     | France      | 45.28 | 5.90  | 230  | Grassland | 07/2016 |
| Cunnersdorf    | CUC001     | Germany     | 51.37 | 12.56 | 140  | Cropland  | 06/2016 |
| Derlo          | DEC001     | Poland      | 52.17 | 23.37 | 129  | Grassland | 04/2013 |
| Fendt          | FEC001     | Germany     | 47.83 | 11.06 | 595  | Grassland | 06/2015 |
| Fuerstensee    | FSC001     | Germany     | 53.32 | 13.12 | 66   | Grassland | 01/2014 |
| Grosses Bruch  | GBC001     | Germany     | 52.03 | 11.11 | 80   | Cropland  | 07/2014 |
| Gludsted       | GLC001     | Denmark     | 56.07 | 9.33  | 86   | Forest    | 02/2013 |
| Harrild        | HAC001     | Denmark     | 56.02 | 9.16  | 66   | Shrubland | 03/2014 |
| Hordorf        | HDC001     | Germany     | 52.00 | 11.18 | 82   | Cropland  | 06/2020 |
| Serrahn        | HHC001     | Germany     | 53.34 | 13.17 | 96   | Forest    | 08/2016 |
| Hohes Holz     | HOC001     | Germany     | 52.09 | 11.23 | 217  | Forest    | 08/2014 |
| Jena           | JEC001     | Germany     | 50.95 | 11.63 | 140  | Grassland | 03/2015 |
| Merzenhausen   | MEBCK001   | Germany     | 50.93 | 6.30  | 91   | Cropland  | 02/2011 |
| Olocau         | OLC001     | Spain       | 39.71 | -0.52 | 415  | Shrubland | 01/2017 |
| Petzenkirchen  | PEC001     | Austria     | 48.16 | 15.15 | 278  | Cropland  | 12/2013 |
| Rietholzbach   | RIC001     | Switzerland | 47.38 | 8.99  | 755  | Grassland | 12/2010 |
| Rollesbroich1  | ROC001     | Germany     | 50.62 | 6.30  | 515  | Grassland | 05/2011 |
| Rollesbroich2  | ROC002     | Germany     | 50.62 | 6.31  | 506  | Grassland | 07/2012 |
| Schoeneseiffen | RUBCDKR001 | Germany     | 50.52 | 6.38  | 611  | Grassland | 08/2015 |
| Gevenich       | RUBCK002   | Germany     | 50.99 | 6.32  | 107  | Cropland  | 07/2011 |
| Ruraue         | RUBCK003   | Germany     | 50.86 | 6.43  | 100  | Grassland | 11/2011 |
| Wildenrath     | RUBCK004   | Germany     | 51.13 | 6.17  | 72   | Forest    | 04/2012 |
| Heinsberg      | RUC004     | Germany     | 51.04 | 6.10  | 58   | Cropland  | 09/2011 |
| Kall           | RUC005     | Germany     | 50.50 | 6.53  | 505  | Grassland | 09/2011 |

|              |              |           |        |        |      |           |         |
|--------------|--------------|-----------|--------|--------|------|-----------|---------|
| Aachen       | RUC006       | Germany   | 50.80  | 6.03   | 232  | Cropland  | 01/2012 |
| Kleinhau1    | RUC007       | Germany   | 50.72  | 6.37   | 374  | Grassland | 08/2015 |
| Saerheim     | SAC001       | Norway    | 58.76  | 5.65   | 91   | Grassland | 09/2017 |
| Schaefer1    | SCC001       | Germany   | 51.66  | 11.04  | 425  | Cropland  | 10/2010 |
| Schaefer4    | SCC004       | Germany   | 51.66  | 11.05  | 399  | Cropland  | 09/2010 |
| Selhausen    | SEC001       | Germany   | 50.87  | 6.45   | 101  | Cropland  | 03/2015 |
| Toulouse     | TOC001       | France    | 43.39  | 1.29   | 188  | Grassland | 02/2011 |
| Voulund      | VOC001       | Denmark   | 56.04  | 9.16   | 67   | Cropland  | 02/2013 |
| Wildacker    | WAC001       | Germany   | 53.33  | 13.20  | 96   | Forest    | 07/2013 |
| Wuestebach1  | WUC001       | Germany   | 50.50  | 6.33   | 605  | Forest    | 02/2011 |
| Wuestebach2  | WUC002       | Germany   | 50.51  | 6.33   | 607  | Forest    | 06/2014 |
| Baldry       | AUS_SITE_001 | Australia | -32.87 | 148.53 | 438  | Shrubland | 03/2011 |
| Daly         | AUS_SITE_002 | Australia | -14.16 | 131.39 | 75   | Shrubland | 06/2011 |
| Gnangara     | AUS_SITE_003 | Australia | -31.38 | 115.71 | 50   | Forest    | 05/2011 |
| Robson       | AUS_SITE_006 | Australia | -17.12 | 145.63 | 715  | Forest    | 10/2010 |
| Temora       | AUS_SITE_007 | Australia | -34.40 | 147.53 | 294  | Cropland  | 05/2013 |
| Tullochgorum | AUS_SITE_008 | Australia | -41.67 | 147.91 | 285  | Cropland  | 12/2010 |
| Tumbarumba   | AUS_SITE_009 | Australia | -35.66 | 148.15 | 1200 | Forest    | 04/2011 |
| Weany Creek  | AUS_SITE_010 | Australia | -19.88 | 146.54 | 287  | Grassland | 12/2010 |
| Yanco        | AUS_SITE_011 | Australia | -35.01 | 146.30 | 124  | Cropland  | 04/2011 |
| Hamilton     | AUS_SITE_015 | Australia | -37.83 | 142.09 | 119  | Cropland  | 07/2015 |
| Bishes       | AUS_SITE_018 | Australia | -35.77 | 142.97 | 94   | Cropland  | 04/2016 |
