# Supplementary material for: Evaluation of reanalysis soil moisture products using Cosmic Ray Neutron Sensor observations across the globe
Source: Copernicus journal article supplement (doi:10.5194/hess-2023-224), 2023-10-09
Supplement: Supplementary file 1 [file hess-2023-224-supplement.zip › CRNSsiteDataNEW.xlsx]

## Sheet: MetaData
CRNS site name	Station ID	Country	Latitude	Longitude	Elevation (m)	Reclassified land cover	Start date	Mean Annual Temperature (Degree Celsius)	Mean Annual Precipitation (mm)	Slope (Degree)	Bulk density (g/cm3)	Soil organic carbon (g/g)	Aridity	Seasonality	Snow	Note
Manitou Forest Tower	USA_SITE_004	USA	39.101	-105.102	2411	Forest	10/2009	3.31007	661.709	2.84906	1.4	0.005	-0.631131	0.251503	0.224832	The indice of aridity, seasonality and snow is derived from Knoben et al. (2018), details can be found in section 2.3 of the main paper.
Marshall Colorado	USA_SITE_006	USA	39.9495	-105.195	1756	Cropland	10/2009	7.13835	662.228	0.76048	1.5	0.016	-0.607678	0.321688	0.12304
Kendall	USA_SITE_010	USA	31.7368	-109.942	1548	Shrubland	06/2010	16.9236	226.112	2.14876	1.23	0.008	-0.814162	0.436133	0
Santa Rita Creosote	USA_SITE_011	USA	31.9085	-110.839	989	Shrubland	06/2010	18.7745	321.855	1.1485	1.43	0.003	-0.772721	0.494602	0
SMAP-OK	USA_SITE_014	USA	36.0635	-97.217	326	Grassland	07/2010	16.6826	868.571	1.22785	1.42	0.0065	-0.378355	0.444549	0
ARM-1	USA_SITE_015	USA	36.6054	-97.4878	322	Cropland	07/2010	16.2627	816.476	0.795674	1.4	0.0059	-0.340873	0.38361	0
Iowa Validation Site	USA_SITE_016	USA	41.9832	-93.6837	316	Cropland	09/2010	9.92585	1022.09	0.227161	1.43	0.0159	-0.0941686	0.667033	0.0923326
San Pedro 2	USA_SITE_020	USA	31.5615	-110.14	1233	Shrubland	01/2011	18.2819	227.581	1.017	1.42	0.005	-0.807107	0.438802	0
Desert Chaparral UCI	USA_SITE_023	USA	33.6094	-116.451	1292	Shrubland	03/2011	16.009	296.646	2.108	1.58	0.0017	-0.920925	0.437297	0
Coastal Sage UCI	USA_SITE_024	USA	33.7342	-117.696	320	Shrubland	03/2011	17.1667	346.539	7.16214	1.16	0.0121	-0.622233	1.49524	0
Chestnut Ridge NOAA	USA_SITE_025	USA	35.9311	-84.3324	370	Forest	03/2011	15.584	1383.14	8.07213	1.41	0.01	0.260184	1.03089	0
Bondville	USA_SITE_026	USA	40.0062	-88.2904	219	Cropland	03/2011	12.0608	1060.92	0.514428	1.45	0.0157	0.0235868	0.89163	0.168178
Morgan Monroe	USA_SITE_027	USA	39.3232	-86.4131	275	Forest	03/2011	12.6022	1205.27	3.88456	1.38	0.0121	0.144145	1.02483	0.0676075
Mozark	USA_SITE_028	USA	38.7441	-92.2	219	Forest	04/2011	13.619	1066.96	2.83638	1.43	0.0145	-0.013398	0.839588	0.0425208
Neb Field 3	USA_SITE_029	USA	41.1799	-96.4412	363	Cropland	04/2011	11.3344	919.444	0.219591	1.42	0.0126	-0.242614	0.597265	0.0931819
Harvard Forest	USA_SITE_030	USA	42.5378	-72.1715	350	Forest	05/2011	9.08247	1125.71	2.10025	0.89	0.0605	0.219484	0.848365	0.210145
Howland	USA_SITE_031	USA	45.2041	-68.7402	124	Forest	05/2011	7.11536	1190.17	0.585206	1.23	0.0815	0.390596	1.00041	0.297725
Tonzi Ranch	USA_SITE_032	USA	38.4316	-120.966	177	Shrubland	05/2011	16.4826	772.661	0.889609	1.49	0.0055	-0.476807	1.76561	0
Soaproot	USA_SITE_033	USA	37.031	-119.256	1160	Forest	06/2011	14.1696	898.556	6.06485	1.02	0.0325	-0.466181	1.71069	0
P301	USA_SITE_034	USA	37.0678	-119.194	2014	Forest	06/2011	8.18012	976.56	2.62693	1.05	0.0236	-0.466181	1.71069	0
Wind River	USA_SITE_035	USA	45.8205	-121.952	371	Forest	06/2011	8.46763	2194.6	2.08238	0.88	0.038	0.580173	1.83327	0.158116
Hauser Farm South	USA_SITE_037	USA	34.5766	-111.859	942	Cropland	06/2011	17.0259	423.895	0.581542	1.5	0.0055	-0.756035	0.776848	0
Metolius	USA_SITE_038	USA	44.4523	-121.557	1253	Forest	06/2011	8.06945	897.781	0.785277	1.04	0.0136	0.0766463	1.78565	0.400181
Rosemount	USA_SITE_041	USA	44.7143	-93.0898	260	Cropland	07/2011	7.76224	950.845	0.210869	1.45	0.0172	-0.218039	0.558371	0.0801946
Park Falls	USA_SITE_042	USA	45.9459	-90.2723	470	Forest	07/2011	5.49748	947.031	1.19154	1.26	0.0142	0.099613	0.828823	0.210948
UMBS	USA_SITE_043	USA	45.5598	-84.7138	220	Forest	07/2011	6.86902	939	0.976031	1.29	0.008	0.18813	1.10936	0.247708
Daniel Forest	USA_SITE_046	USA	41.8651	-111.509	2600	Forest	08/2011	4.53125	703.681	6.06058	1.14	0.0172	-0.58373	1.46907	0.276959
Tenderfoot Creek	USA_SITE_047	USA	46.9514	-110.887	2255	Forest	08/2011	2.55021	729.993	5.82078	1.32	0.0111	-0.595347	0.518036	0.255554
Fort Peck	USA_SITE_048	USA	48.3077	-105.102	634	Grassland	08/2011	6.20983	465.983	0.857082	1.28	0.0118	-0.622298	0.983399	0.16143
JERC	USA_SITE_052	USA	31.2364	-84.4617	40	Forest	09/2011	19.9408	1075.49	1.06552	1.38	0.0066	0.100661	0.960188	0
Savannah River	USA_SITE_053	USA	33.3828	-81.566	94	Forest	09/2011	18.4904	1124.89	0.635081	1.41	0.0053	-0.0754065	0.864359	0
Freeman Ranch	USA_SITE_057	USA	29.9491	-97.9966	265	Forest	10/2011	20.4715	921.799	1.89848	1.624	0.0198	-0.405034	0.64267	0
Sevilleta New Grass	USA_SITE_058	USA	34.3999	-106.674	1566	Shrubland	02/2012	15.484	186.197	0.702636	1.58	0.0103	-0.771528	0.416704	0
Lucky Hills	USA_SITE_060	USA	31.7442	-110.052	1367	Shrubland	03/2012	18.2619	231.204	1.67696	1.44	0.0365	-0.807107	0.438802	0
Flag Wildfire	USA_SITE_061	USA	35.4455	-111.772	2313	Shrubland	04/2012	8.50277	481.925	1.89024	1.1	0.0196	-0.605234	1.20958	0.292717
Flag Ponderosa Pine	USA_SITE_062	USA	35.4386	-111.804	2381	Forest	04/2012	8.50277	481.925	3.02556	1.1	0.0134	-0.605234	1.20958	0.292717
Beltsville	USA_SITE_065	USA	39.0295	-76.8462	42	Grassland	04/2012	13.9306	1205	0.960368	1.582	0.0085	0.0306107	0.875375	0
Jornada Mixed Shrubland	USA_SITE_072	USA	32.58	-106.6	0	Shrubland	01/2013	17.3623	280.856	1.56964	1.3	0.01	-0.814297	0.401021	0
AliceHolt	ALIC1	UK	51.1536	-0.8582	80	Forest	06/2015	10.7547	1189.29	0.576203	0.85	0.042	0.193023	1.38491	0
Balruddery	BALRD	UK	56.4823	-3.1115	130	Cropland	05/2014	8.52602	706.737	3.5316	1.34	0.023	0.414983	1.05379	0
BickleyHall	BICKL	UK	53.0264	-2.7005	78	Grassland	01/2015	9.88505	645.83	0.828514	1.31	0.02	0.314395	1.16324	0
BunnyPark	BUNNY	UK	52.8607	-1.1268	39	Cropland	01/2015	10.4908	529.835	0.444339	1.55	0.016	0.149085	1.26287	0
Cardington	CARDT	UK	52.1056	-0.4246	29	Cropland	06/2015	10.9389	445.463	0.541288	1.14	0.04	-0.00644966	1.25732	0
ChimneyMeadows	CHIMN	UK	51.708	-1.4788	65	Grassland	02/2013	10.5508	565.368	0.300577	1.36	0.027	0.0652526	1.34721	0
ChobhamCommon	CHOBH	UK	51.368	-0.5975	47	Forest	02/2015	10.4454	628.033	1.12792	0.9	0.031	0.193023	1.38491	0
Cochno	COCHN	UK	55.9414	-4.4035	168	Grassland	08/2017	8.24337	1163.25	3.97237	0.83	0.068	0.65058	0.929103	0
CocklePark	COCLP	UK	55.216	-1.6944	87	Cropland	11/2014	9.01749	566.71	1.9066	1.21	0.033	0.276337	1.08569	0
Crichton	CRICH	UK	55.0431	-3.5834	42	Grassland	02/2014	9.27392	1091.38	1.49084	1.15	0.045	0.694473	0.863049	0
CwmGarw	CGARW	UK	51.9514	-4.7466	299	Grassland	06/2016	9.48796	1778.92	6.82675	0.96	0.048	0.548283	1.0196	0
EasterBush	EASTB	UK	55.8674	-3.2071	208	Grassland	08/2014	8.23923	826.727	1.47004	1.1	0.033	0.445024	1.02216	0
Elmsett	ELMST	UK	52.0946	0.9931	76	Cropland	11/2016	10.5787	536.905	0.545249	1.26	0.022	0.0668207	1.24091	0
Euston	EUSTN	UK	52.3364	0.7959	18	Cropland	03/2016	10.7477	572.805	0.667954	1.27	0.029	0.0668207	1.24091	0
Fincham	FINCH	UK	52.6178	0.5107	15	Cropland	07/2017	10.7538	547.97	0.843784	1.33	0.02	0.208263	1.16431	0
GisburnForest	GISBN	UK	54.0238	-2.3846	246	Forest	08/2014	8.28345	1644.45	2.51973	0.82	0.061	0.718266	0.761388	0
Glensaugh	GLENS	UK	56.9144	-2.5622	399	Shrubland	05/2014	6.19342	1104.89	10.1696	0.44	0.203	0.497463	0.919847	0
Glenwherry	GLENW	UK	54.8381	-6.0046	274	Grassland	06/2016	8.00664	1078.43	3.90301	0.54	0.153	0.500208	1.03172	0
Hadlow	HADLW	UK	51.2286	0.3202	33	Cropland	10/2016	11.0732	557.53	0.764135	1.22	0.031	0.209908	1.34465	0
HartwoodHome	HARTW	UK	55.8103	-3.829	225	Grassland	05/2014	8.01492	867.062	2.55655	1.02	0.043	0.4924	1.12358	0
HarwoodForest	HARWD	UK	55.2159	-2.0235	300	Forest	05/2015	7.48731	1208.37	2.41148	0.33	0.304	0.544474	0.976068	0
HenfaesFarm	HENFS	UK	53.2254	-4.0124	287	Shrubland	12/2015	9.41847	1373.18	9.79685	0.97	0.077	0.551538	0.926667	0
Heytesbury	HYBRY	UK	51.2029	-2.0796	166	Grassland	08/2017	10.2846	290.98	2.453	0.88	0.066	0.35555	1.26927	0
Hillsborough	HILLB	UK	54.447	-6.0684	146	Grassland	06/2016	9.26427	801.275	2.57683	1.15	0.042	0.55882	0.932441	0
HollinHill	HOLLN	UK	54.1107	-0.9595	82	Cropland	03/2014	9.56589	658.982	6.86846	1.06	0.032	0.31614	1.18499	0
Loddington	LODTN	UK	52.6102	-0.8264	186	Cropland	04/2016	10.0357	534.83	2.05258	1.16	0.036	0.0940859	1.21491	0
LullingtonHeath	LULLN	UK	50.7937	0.1889	119	Grassland	12/2014	10.8999	753.102	4.09799	0.9	0.043	0.184066	1.32825	0
MoorHouse	MOORH	UK	54.6594	-2.4678	565	Grassland	04/2014	6.99337	1343.2	6.56859	0.76	0.076	0.622278	0.934872	0
Morley	MORLY	UK	52.5481	1.0342	55	Cropland	05/2014	10.3265	588.45	0.542184	1.53	0.017	0.125062	1.20669	0
NorthWyke	NWYKE	UK	50.7735	-3.906	181	Grassland	10/2014	10.3082	705.855	2.35354	1.12	0.037	0.605243	1.12114	0
Plynlimon	PLYNL	UK	52.4534	-3.7626	542	Grassland	05/2014	7.3022	2510.59	5.93844	0.62	0.098	0.736029	0.714007	0
PortonDown	PORTN	UK	51.1199	-1.6812	146	Grassland	12/2014	10.2344	688.35	1.86406	0.97	0.049	0.226607	1.40172	0
Redhill	REDHL	UK	51.2629	0.4291	91	Grassland	02/2016	10.75	662.82	2.07609	1.26	0.024	0.209908	1.34465	0
Redmere	RDMER	UK	52.4458	0.421	3	Shrubland	10/2015	10.5931	478.875	0.262271	0.6	0.238	0.0113272	1.28348	0
Riseholme	RISEH	UK	53.2616	-0.5259	53	Grassland	04/2016	10.3397	556.12	0.759671	1.27	0.032	0.0780488	1.17696	0
Rothamsted	ROTHD	UK	51.8139	-0.3783	131	Cropland	07/2014	10.4801	530.777	0.448594	1.33	0.021	0.06222	1.35537	0
Sheepdrove	SHEEP	UK	51.5303	-1.4819	170	Cropland	10/2013	9.97913	685.336	2.25777	1.04	0.059	0.0652526	1.34721	0
Sourhope	SOURH	UK	55.4799	-2.23	487	Grassland	11/2014	7.75243	760.737	7.41463	0.65	0.086	0.544474	0.976068	0
SpenFarm	SPENF	UK	53.8689	-1.3189	57	Cropland	11/2016	10.1437	616.895	1.0163	1.41	0.019	0.196098	1.20553	0
Stiperstones	STIPS	UK	52.5812	-2.9447	432	Grassland	06/2014	7.96676	846.3	4.2199	0.62	0.104	0.227114	1.27696	0
Stoughton	STGHT	UK	52.6016	-1.047	130	Cropland	08/2015	10.2079	565.94	1.12785	1.33	0.027	0.149085	1.26287	0
TadhamMoor	TADHM	UK	51.2075	-2.8288	7	Grassland	10/2014	10.8472	645.95	0.241415	0.32	0.314	0.387615	1.23495	0
TheLizard	LIZRD	UK	50.0328	-5.1999	85	Shrubland	10/2014	11.1416	958.102	0.500501	0.95	0.058	0.51001	1.04791	0
Waddesdon	WADDN	UK	51.8395	-0.9484	98	Grassland	04/2013	10.6852	517.62	2.31738	1.11	0.034	0.122549	1.32089	0
Writtle	WRTTL	UK	51.734	0.4179	44	Cropland	04/2017	11.1282	446.87	1.34402	1.26	0.035	-0.00815813	1.30815	0
Aas	AAC001	Norway	59.664	10.762	72	Grassland	09/2016	6.2	1240	1.67333	1.029	0.082	0.345207	1.29688	0.193011
Acheleschwaig	ACC001	Germany	47.666	10.994	867	Grassland	06/2017	7	1805	6.7525	0.853	0.063	0.388699	0.60129	0.0515554
Agia	AGCK003	Greece	39.755	22.717	1032	Shrubland	03/2017	12.5	1003	16.7552	1.258	0.031	-0.499183	1.60989	0
Alento1	ALC001	Italy	40.311	15.229	671	Forest	02/2016	13.6	1255	15.8698	0.858	0.075	-0.371706	1.4073	0
Alento2	ALC002	Italy	40.365	15.184	453	Cropland	02/2016	15.4	1215	7.82103	1.126	0.037	-0.371706	1.4073	0
Calderona1	CAC001	Spain	39.708	-0.457	785	Shrubland	10/2016	16.6	525	6.97262	1.177	0.032	-0.645769	0.858546	0
Crolles	CRC001	France	45.281	5.901	230	Grassland	07/2016	7.5	900	0.170614	1.612	0.04	0.119492	1.22455	0
Cunnersdorf	CUC001	Germany	51.37	12.557	140	Cropland	06/2016	10.5	868	1.70977	1.491	0.018	-0.298137	1.31266	0
Derlo	DEC001	Poland	52.17	23.369	129	Grassland	04/2013	7.5	550	1.04326	1.43	0.015	-0.218321	1.30505	0.165773
Fendt	FEC001	Germany	47.832	11.06	595	Grassland	06/2015	8.4	1630	1.38585	0.725	0.03	0.351228	0.76339	0.112498
Fuerstensee	FSC001	Germany	53.319	13.122	66	Grassland	01/2014	9.7	580	0.277207	1.135	0.031	-0.112052	1.32499	0
Grosses Bruch	GBC001	Germany	52.03	11.105	80	Cropland	07/2014	9.9	845	0.233218	1.176	0.05	-0.100284	1.27463	0
Gludsted	GLC001	Denmark	56.071	9.334	86	Forest	02/2013	8.2	1050	0.307517	0.814	0.163	0.271197	1.31521	0
Harrild	HAC001	Denmark	56.022	9.155	66	Shrubland	03/2014	8.2	1050	0.319852	0.873	0.086	0.271197	1.31521	0
Hordorf	HDC001	Germany	51.997	11.179	82	Cropland	06/2020	10	818	0.22144	1.278	0.025	-0.0765935	1.26378	0
Serrahn	HHC001	Germany	53.339	13.174	96	Forest	08/2016	9.7	580	1.56716	1.014	0.064	-0.112052	1.32499	0
Hohes Holz	HOC001	Germany	52.09	11.226	217	Forest	08/2014	10	820	1.27847	1.136	0.026	-0.100284	1.27463	0
Jena	JEC001	Germany	50.951	11.625	140	Grassland	03/2015	9.9	612	0.660117	1.34	0.025	-0.103239	1.24922	0.0619836
Merzenhausen	MEBCK001	Germany	50.93	6.297	91	Cropland	02/2011	10.3	718	0.289812	1.31	0.012	0.298668	1.11117	0
Olocau	OLC001	Spain	39.707	-0.517	415	Shrubland	01/2017	16.2	544	6.69191	1.426	0.017	-0.632057	0.875431	0
Petzenkirchen	PEC001	Austria	48.155	15.148	278	Cropland	12/2013	10	1065	3.05004	1.317	0.004	0.0824698	1.1045	0.106731
Rietholzbach	RIC001	Switzerland	47.381	8.993	755	Grassland	12/2010	7.1	1460	9.63725	0.964	0.052	0.49481	0.583668	0
Rollesbroich1	ROC001	Germany	50.622	6.304	515	Grassland	05/2011	7	1018	1.47517	1.032	0.039	0.298668	1.11117	0
Rollesbroich2	ROC002	Germany	50.624	6.305	506	Grassland	07/2012	7	1018	2.30027	0.944	0.058	0.298668	1.11117	0
Schoeneseiffen	RUBCDKR001	Germany	50.515	6.376	611	Grassland	08/2015	7	870	2.98583	1	0.038	0.298668	1.11117	0
Gevenich	RUBCK002	Germany	50.989	6.324	107	Cropland	07/2011	10.3	718	0.383542	1.318	0.014	0.298668	1.11117	0
Ruraue	RUBCK003	Germany	50.862	6.427	100	Grassland	11/2011	10.3	718	0.244405	1.102	0.022	0.298668	1.11117	0
Wildenrath	RUBCK004	Germany	51.133	6.169	72	Forest	04/2012	10.3	722	2.90297	1.126	0.025	0.0945728	1.24608	0
Heinsberg	RUC004	Germany	51.041	6.104	58	Cropland	09/2011	10.3	722	1.02528	1.215	0.026	0.0945728	1.24608	0
Kall	RUC005	Germany	50.501	6.526	505	Grassland	09/2011	8	857	1.85847	0.959	0.038	0.217505	1.18554	0
Aachen	RUC006	Germany	50.799	6.025	232	Cropland	01/2012	10.3	865	1.04192	1.112	0.023	0.298668	1.11117	0
Kleinhau1	RUC007	Germany	50.722	6.372	374	Grassland	08/2015	9	614	1.28676	1.019	0.042	0.298668	1.11117	0
Saerheim	SAC001	Norway	58.761	5.651	91	Grassland	09/2017	7.7	2500	1.81116	1.146	0.15	0.638941	1.04568	0
Schaefertal1	SCC001	Germany	51.657	11.043	425	Cropland	10/2010	9.9	951	2.79075	1.185	0.037	-0.0765935	1.26378	0
Schaefertal4	SCC004	Germany	51.655	11.049	399	Cropland	09/2010	9.9	951	2.59716	1.01	0.033	-0.0765935	1.26378	0
Selhausen	SEC001	Germany	50.866	6.447	101	Cropland	03/2015	10.3	718	0.291856	1.276	0.01	0.298668	1.11117	0
Toulouse	TOC001	France	43.385	1.292	188	Grassland	02/2011	13.6	1028	0.629023	1.354	0.008	-0.326421	1.30632	0
Voulund	VOC001	Denmark	56.036	9.156	67	Cropland	02/2013	8.2	1050	0.679973	1.388	0.045	0.271197	1.31521	0
Wildacker	WAC001	Germany	53.33	13.199	96	Forest	07/2013	9.7	580	2.42904	1.095	0.025	-0.112052	1.32499	0
Wuestebach1	WUC001	Germany	50.503	6.333	605	Forest	02/2011	7	1180	3.01396	0.697	0.088	0.298668	1.11117	0
Wuestebach2	WUC002	Germany	50.505	6.331	607	Forest	06/2014	7	1180	3.23758	0.417	0.07	0.298668	1.11117	0
Baldry	AUS_SITE_001	Australia	-32.871	148.526	438	Shrubland	03/2011			1.84235	1.37	0.0099	-0.460896	1.2733	0
Daly	AUS_SITE_002	Australia	-14.1592	131.388	75	Shrubland	06/2011	24.3383	841.667	0.973717	1.46	0.0023	-0.483215	1.50449	0
Gnangara	AUS_SITE_003	Australia	-31.3767	115.713	50	Forest	05/2011	15.4868	615.257	0.160427	1.42	0.0023	-0.654252	1.30935	0
Robson	AUS_SITE_006	Australia	-17.12	145.63	715	Forest	10/2010	11.4014	1321.96	2.77432	1.14	0.0286	0.327459	1.35312	0
Temora	AUS_SITE_007	Australia	-34.4046	147.533	294	Cropland	05/2013	12.2463	365	0.334277	1.59	0.016	-0.592131	1.15613	0
Tullochgorum	AUS_SITE_008	Australia	-41.6694	147.912	285	Cropland	12/2010	11.801	377.457	3.07956	1.355	0.0157	-0.0845537	1.58061	0
Tumbarumba	AUS_SITE_009	Australia	-35.656	148.152	1200	Forest	04/2011	12.9548	1171.1	2.48021	0.95	0.0353	0.226855	1.43274	0
Weany Creek	AUS_SITE_010	Australia	-19.882	146.536	287	Grassland	12/2010	19.6079	633.833	1.05425	1.66	0.0087	-0.546677	1.17657	0
Yanco	AUS_SITE_011	Australia	-35.005	146.299	124	Cropland	04/2011	14.2239	296.125	0.106491	1.57	0.0028	-0.663162	1.12261	0
Hamilton	AUS_SITE_015	Australia	-37.829	142.089	119	Cropland	07/2015	12.7292	539	0.722659	1.26	0.016	-0.365409	1.43373	0
Bishes	AUS_SITE_018	Australia	-35.769	142.973	94	Cropland	04/2016	15.9334	243.6	0.377328	1.466	0.002	-0.753158	0.7453	0
