# Supplementary material for: Evaluation of reanalysis soil moisture products using Cosmic Ray Neutron Sensor observations across the globe
Source: Copernicus journal article supplement (doi:10.5194/hess-2023-224), 2023-10-09
Supplement: Supplementary file 1 [file hess-2023-224-supplement.zip › StatisticMetricNEW.xlsx]

## Sheet: 1R
CRNS site name	Station ID	Country	ERA5-Land	CFSv2	MERRA2	JRA55	GLDAS	CRA40	GLEAM
Manitou Forest Tower	USA_SITE_004	USA	0.655405	0.521355	0.75127	0.597618	0.434074	0.703955	0.745019
Marshall Colorado	USA_SITE_006	USA	0.807074	0.639604	0.835287	0.624664	0.632589	0.831651	0.786713
Kendall	USA_SITE_010	USA	0.67772	0.620043	0.616838	0.578181	0.671474	0.740314	0.728631
Santa Rita Creosote	USA_SITE_011	USA	0.724118	0.711182	0.703699	0.474647	0.680627	0.820305	0.859793
SMAP-OK	USA_SITE_014	USA	0.812631	0.738656	0.809047	0.679634	0.72112	0.782668	0.780291
ARM-1	USA_SITE_015	USA	0.749572	0.681856	0.770407	0.603835	0.678906	0.693485	0.643959
Iowa Validation Site	USA_SITE_016	USA	0.555899	0.411079	0.485329	0.521416	0.512144	0.531347	0.612814
San Pedro 2	USA_SITE_020	USA	0.48778	0.83284	0.738766	0.589959	0.797279	0.781368	0.839946
Desert Chaparral UCI	USA_SITE_023	USA	0.806049	0.821663	0.766598	0.680895	0.679179	0.781041	0.849472
Coastal Sage UCI	USA_SITE_024	USA	0.909956	0.894182	0.797258	0.783334	0.832713	0.930846	0.888065
Chestnut Ridge NOAA	USA_SITE_025	USA	0.610363	0.729543	0.690733	0.721275	0.742474	0.796433	0.710962
Bondville	USA_SITE_026	USA	0.662409	0.596118	0.53346	0.630434	0.487882	0.619549	0.694165
Morgan Monroe	USA_SITE_027	USA	0.783805	0.823616	0.713394	0.817432	0.651466	0.742496	0.80285
Mozark	USA_SITE_028	USA	0.746935	0.76661	0.823002	0.694855	0.75982	0.839449	0.776101
Neb Field 3	USA_SITE_029	USA	0.680569	0.53822	0.553408	0.614618	0.548726	0.682612	0.643137
Harvard Forest	USA_SITE_030	USA	0.752276	0.66865	0.776958	0.811981	0.635759	0.70304	0.753131
Howland	USA_SITE_031	USA	0.746852	0.621102	0.76903	0.793863	0.795618	0.545116	0.77902
Tonzi Ranch	USA_SITE_032	USA	0.950355	0.953948	0.913575	0.841952	0.937033	0.925365	0.945623
Soaproot	USA_SITE_033	USA	0.885063	0.795436	0.807021	0.609058	0.862932	0.884494	0.884415
P301	USA_SITE_034	USA	0.83867	0.703959	0.813862	0.468074	0.7678	0.787763	0.808343
Wind River	USA_SITE_035	USA	0.822815	0.821514	0.775732	0.864331	0.832031	0.871238	0.780958
Hauser Farm South	USA_SITE_037	USA	0.28871	0.167039	0.200722	0.361491	0.353655	0.154159	0.352014
Metolius	USA_SITE_038	USA	0.833838	0.760704	0.384178	0.886315	0.879832	0.877838	0.90395
Rosemount	USA_SITE_041	USA	0.526056	0.311687	0.263949	0.491096	0.372576	0.435513	0.504428
Park Falls	USA_SITE_042	USA	0.760544	0.607358	0.571308	0.623219	0.576037	0.659398	0.632506
UMBS	USA_SITE_043	USA	0.854813	0.685818	0.645662		0.732019		0.830603
Daniel Forest	USA_SITE_046	USA	0.807393	0.685057	0.693716	0.692901	0.808922	0.804342	0.821005
Tenderfoot Creek	USA_SITE_047	USA	0.778076	0.668715	0.726161	0.742153	0.818306	0.802098	0.783181
Fort Peck	USA_SITE_048	USA	0.76913	0.758819	0.719422	0.679167	0.735641	0.73662	0.761749
JERC	USA_SITE_052	USA	0.774117	0.596185	0.571332	0.701059	0.671464	0.820479	0.665154
Savannah River	USA_SITE_053	USA	0.834896	0.759961	0.59996	0.739781	0.658138	0.832204	0.631883
Freeman Ranch	USA_SITE_057	USA	0.850795	0.828005	0.845787	0.771664	0.790186	0.845554	0.825623
Sevilleta New Grass	USA_SITE_058	USA	0.323231	0.625291	0.597321	0.523241	0.573636	0.625676	0.755618
Lucky Hills	USA_SITE_060	USA	0.269503	0.33682	0.437204	0.3064	0.3911	0.460519	0.48343
Flag Wildfire	USA_SITE_061	USA	0.787808	0.601518	0.652244	0.543975	0.635986	0.748111	0.808628
Flag Ponderosa Pine	USA_SITE_062	USA	0.814742	0.541245	0.744415	0.59691	0.751244	0.828982	0.824747
Beltsville	USA_SITE_065	USA	0.736626	0.795364	0.794923	0.57437	0.609962	0.513085	0.78502
Jornada Mixed Shrubland	USA_SITE_072	USA	0.644222	0.728576	0.736114	0.693118	0.609331	0.826973	0.865204
AliceHolt	ALIC1	UK	0.663962	0.84312	0.88805	0.738829	0.787403	0.87485	0.867908
Balruddery	BALRD	UK	0.849896	0.632348	0.455147	0.735151	0.682686	0.573162	0.813907
BickleyHall	BICKL	UK	0.880543	0.844977	0.671656	0.845834	0.78261	0.862357	0.764672
BunnyPark	BUNNY	UK	0.923403	0.816156	0.635216	0.829536	0.789493	0.73864	0.853503
Cardington	CARDT	UK	0.821588	0.874715	0.863331	0.793314	0.783263	0.863142	0.883694
ChimneyMeadows	CHIMN	UK	0.740954	0.883844	0.812219	0.84287	0.84481	0.870169	0.855866
ChobhamCommon	CHOBH	UK	0.752436	0.873126	0.821203	0.826503	0.805269	0.87799	0.89374
Cochno	COCHN	UK	0.530582	0.788653	0.691056	0.548916	0.700991	0.742032	0.74655
CocklePark	COCLP	UK	0.523045	0.772796	0.652342		0.807465		0.875748
Crichton	CRICH	UK	0.703837	0.792537	0.636125	0.692612	0.664329	0.743147	0.673085
CwmGarw	CGARW	UK	0.722916	0.799436	0.567876	0.638043	0.624799		0.595607
EasterBush	EASTB	UK	0.789104	0.754276	0.494306	0.664987	0.718814	0.755146	0.74582
Elmsett	ELMST	UK	0.90316	0.875728	0.704412		0.828939	0.830964	0.856072
Euston	EUSTN	UK	0.902984	0.849355	0.651959	0.75771	0.764912	0.750696	0.793789
Fincham	FINCH	UK	0.814443	0.777495	0.710632	0.687448	0.734573	0.729007	0.773529
GisburnForest	GISBN	UK	0.655487	0.636486	0.520917	0.670869	0.601936	0.616737	0.572079
Glensaugh	GLENS	UK	0.372374	0.25595	0.195386	0.298611	0.285037	0.117646	0.290097
Glenwherry	GLENW	UK	0.593716		0.486156	0.0811946	0.586761	0.618094	0.57712
Hadlow	HADLW	UK	0.912369	0.898532	0.852967	0.868966	0.885294	0.88946	0.863007
HartwoodHome	HARTW	UK	0.72585	0.738013	0.538608	0.63575	0.715477	0.719304	0.700375
HarwoodForest	HARWD	UK	0.636193	0.640486	0.371689	0.63328	0.55168	0.641994	0.640165
HenfaesFarm	HENFS	UK	0.774118	0.691132	0.723062	0.7461	0.703016		0.774364
Heytesbury	HYBRY	UK	0.667066	0.860636	0.691528	0.868155	0.817106	0.80089	0.795585
Hillsborough	HILLB	UK	0.626935	0.779665	0.699782	0.721824	0.691453	0.787357	0.724476
HollinHill	HOLLN	UK	0.810669	0.826707	0.736423	0.70703	0.758208	0.79854	0.831338
Loddington	LODTN	UK	0.676627	0.857127	0.718416	0.825097	0.808556	0.786467	0.870104
LullingtonHeath	LULLN	UK	0.819307	0.873844	0.632988	0.741784	0.841947		0.753848
MoorHouse	MOORH	UK	0.493943	0.681909	0.597451	0.672711	0.611821	0.665606	0.608941
Morley	MORLY	UK	0.795786	0.861773	0.630837	0.786711	0.785131		0.818333
NorthWyke	NWYKE	UK	0.781777	0.829134	0.799261	0.738357	0.852162	0.863844	0.83393
Plynlimon	PLYNL	UK	0.454143		0.391237		0.467979	0.576857	0.632941
PortonDown	PORTN	UK	0.731249	0.860108	0.666172	0.849647	0.768404	0.798775	0.809421
Redhill	REDHL	UK	0.794132	0.865801	0.646632	0.78452	0.799903	0.851857	0.731055
Redmere	RDMER	UK	0.519478	0.516701	0.308773	0.435079	0.368702	0.271048	0.499579
Riseholme	RISEH	UK	0.751208	0.81827	0.717209	0.849057	0.806594	0.78291	0.857643
Rothamsted	ROTHD	UK	0.826072	0.784191	0.643817	0.773792	0.745323	0.786708	0.843847
Sheepdrove	SHEEP	UK	0.837573	0.812591	0.708809	0.834946	0.757597	0.782957	0.814202
Sourhope	SOURH	UK	0.65845	0.688931	0.668319	0.704919	0.717612	0.747821	0.678246
SpenFarm	SPENF	UK	0.756164	0.808107	0.672263	0.800071	0.786633	0.822836	0.793156
Stiperstones	STIPS	UK	0.772892	0.777583	0.611994	0.807882	0.70597	0.766449	0.761711
Stoughton	STGHT	UK	0.872962	0.847498	0.643772	0.834934	0.821133	0.786706	0.853009
TadhamMoor	TADHM	UK	0.447897	0.430908	0.409154	0.452256	0.396447	0.423017	0.509893
TheLizard	LIZRD	UK	0.816754		0.713329		0.790044		0.872866
Waddesdon	WADDN	UK	0.753156	0.861338	0.877815	0.812461	0.854084	0.855321	0.870743
Writtle	WRTTL	UK	0.850511	0.889002	0.851255	0.780786	0.887351	0.845962	0.868872
Aas	AAC001	Norway	0.75748	0.731481	0.368035	0.583474	0.713486	0.629552	0.546023
Acheleschwaig	ACC001	Germany	0.726162	0.738603	0.597746	0.597629	0.556858	0.751767	0.620893
Agia	AGCK003	Greece	0.809155	0.684454	0.703018	0.699869	0.6819	0.758898	0.747553
Alento1	ALC001	Italy	0.927621		0.856996	0.89753	0.852735		0.835236
Alento2	ALC002	Italy	0.912039		0.802972	0.878042	0.84891		0.792503
Calderona1	CAC001	Spain	0.827484	0.836812	0.846305	0.598429	0.717415		0.771911
Crolles	CRC001	France	0.66978	0.542503	0.432249	0.561119	0.605133	0.599059	0.582858
Cunnersdorf	CUC001	Germany	0.829214	0.772416	0.789969	0.828753	0.791912	0.777311	0.888685
Derlo	DEC001	Poland	0.862646	0.797647	0.736777	0.634886	0.785867	0.793989	0.842149
Fendt	FEC001	Germany	0.696703	0.707151	0.740003	0.627537	0.758512	0.717705	0.668483
Fuerstensee	FSC001	Germany	0.885672	0.79553	0.665106	0.79984	0.784868	0.806085	0.894095
Grosses Bruch	GBC001	Germany	0.800556	0.825615	0.717137	0.751316	0.733171	0.751149	0.844518
Gludsted	GLC001	Denmark	0.815078	0.82907	0.516029	0.798118	0.764589	0.769997	0.839276
Harrild	HAC001	Denmark	0.653214	0.65123	0.294209	0.66011	0.620777	0.570998	0.726673
Hordorf	HDC001	Germany	0.68708	0.701925	0.548467	0.590198	0.66082	0.621342	0.681204
Serrahn	HHC001	Germany	0.880211	0.843848	0.797436	0.810158	0.845093	0.883917	0.887836
Hohes Holz	HOC001	Germany	0.735374	0.726721	0.767728	0.790534	0.755839	0.81239	0.814319
Jena	JEC001	Germany	0.832357	0.817068	0.655813	0.612589	0.744491	0.668373	0.837732
Merzenhausen	MEBCK001	Germany	0.912706	0.818835	0.656088	0.822393	0.780574	0.749864	0.842073
Olocau	OLC001	Spain	0.787101	0.787428	0.783204	0.525953	0.675858	0.788192	0.758285
Petzenkirchen	PEC001	Austria	0.822355	0.684017	0.519012	0.583424	0.710981	0.722281	0.532934
Rietholzbach	RIC001	Switzerland	0.764737	0.706897	0.572354	0.612524	0.664657	0.690762	0.745154
Rollesbroich1	ROC001	Germany	0.79226	0.657516	0.565267	0.704056	0.73779	0.72581	0.704733
Rollesbroich2	ROC002	Germany	0.773353	0.705882	0.640241	0.724573	0.766128	0.747298	0.735471
Schoeneseiffen	RUBCDKR001	Germany	0.898703	0.794236	0.696134	0.836247	0.834946	0.779299	0.791639
Gevenich	RUBCK002	Germany	0.894607	0.792497	0.626831	0.785675	0.775072	0.699125	0.773421
Ruraue	RUBCK003	Germany	0.859118	0.850681	0.743266	0.841628	0.798474	0.810506	0.867998
Wildenrath	RUBCK004	Germany	0.88697	0.867712	0.743178	0.823272	0.827806	0.838892	0.843562
Heinsberg	RUC004	Germany	0.872656	0.830286	0.708203	0.824381	0.810458	0.796295	0.865359
Kall	RUC005	Germany	0.829061	0.682727	0.57407	0.747696	0.748286	0.679141	0.820078
Aachen	RUC006	Germany	0.869183	0.782022	0.620697	0.774863	0.773537	0.745994	0.844105
Kleinhau1	RUC007	Germany	0.907982	0.809215	0.711866	0.860358	0.828285	0.784921	0.831482
Saerheim	SAC001	Norway			0.608627		0.707452		0.73788
Schaefertal1	SCC001	Germany	0.837506	0.69447	0.620607	0.644104	0.742583	0.599212	0.810185
Schaefertal4	SCC004	Germany	0.821346	0.643454	0.646356	0.573296	0.717237	0.571881	0.715024
Selhausen	SEC001	Germany	0.807885	0.727405	0.589973	0.723343	0.70933	0.667878	0.734761
Toulouse	TOC001	France	0.916747	0.854566	0.824292	0.793952	0.832416	0.829637	0.868089
Voulund	VOC001	Denmark	0.798888	0.786612	0.287893	0.778885	0.755891	0.673598	0.735545
Wildacker	WAC001	Germany	0.843778	0.885171	0.849536	0.734057	0.871837	0.854222	0.877259
Wuestebach1	WUC001	Germany	0.671741	0.506239	0.464219	0.602811	0.617849	0.638749	0.589454
Wuestebach2	WUC002	Germany	0.616553	0.463495	0.47552	0.496154	0.60097	0.551406	0.57502
Baldry	AUS_SITE_001	Australia	0.528726	0.829418	0.868038	0.631491	0.76478	0.83138	0.863778
Daly	AUS_SITE_002	Australia	0.457233	0.732461	0.618762	0.709661	0.712399	0.690962	0.716251
Gnangara	AUS_SITE_003	Australia	0.467863		0.862458	0.782309	0.706438	0.828131	0.833292
Robson	AUS_SITE_006	Australia	0.512934	0.717486	0.68901	0.726233	0.724413		0.784838
Temora	AUS_SITE_007	Australia	0.566475	0.788124	0.829297	0.670974	0.839537	0.816126	0.826224
Tullochgorum	AUS_SITE_008	Australia	0.435452	0.635299	0.889225	0.514352	0.725699	0.792482	0.737603
Tumbarumba	AUS_SITE_009	Australia	0.648235	0.761077	0.695887	0.607543	0.662494	0.744432	0.652861
Weany Creek	AUS_SITE_010	Australia	0.591278	0.772752	0.707389	0.701051	0.739807	0.737299	0.813753
Yanco	AUS_SITE_011	Australia	0.525667	0.678775	0.63331	0.631686	0.617184	0.70173	0.672073
Hamilton	AUS_SITE_015	Australia	0.768696	0.785338	0.881281	0.673119	0.755052	0.794172	0.908296
Bishes	AUS_SITE_018	Australia	0.848211	0.808989	0.662978	0.794985	0.76818	0.700618	0.80943

## Sheet: 2Rsea
CRNS site name	Station ID	Country	ERA5-Land	CFSv2	MERRA2	JRA55	GLDAS	CRA40	GLEAM
Manitou Forest Tower	USA_SITE_004	USA	0.614953	0.493076	0.777117	0.602036	0.443638	0.674563	0.739501
Marshall Colorado	USA_SITE_006	USA	0.852404	0.709069	0.900653	0.739226	0.834179	0.880981	0.837319
Kendall	USA_SITE_010	USA	0.765586	0.663914	0.681175	0.558958	0.767728	0.798246	0.771739
Santa Rita Creosote	USA_SITE_011	USA	0.740018	0.760576	0.758626	0.443179	0.744065	0.833701	0.880034
SMAP-OK	USA_SITE_014	USA	0.846099	0.778699	0.844624	0.706312	0.810958	0.789034	0.794445
ARM-1	USA_SITE_015	USA	0.751443	0.680556	0.765243	0.595373	0.735382	0.672277	0.587723
Iowa Validation Site	USA_SITE_016	USA	0.52576	0.358966	0.469024	0.496595	0.51764	0.494891	0.622153
San Pedro 2	USA_SITE_020	USA	0.66886	0.873232	0.768175	0.714307	0.872605	0.77651	0.90301
Desert Chaparral UCI	USA_SITE_023	USA	0.843054	0.848122	0.807311	0.805992	0.774334	0.798966	0.896063
Coastal Sage UCI	USA_SITE_024	USA	0.922023	0.909866	0.824382	0.852284	0.902631	0.943314	0.905891
Chestnut Ridge NOAA	USA_SITE_025	USA	0.683164	0.80818	0.776233	0.817542	0.848991	0.856867	0.791118
Bondville	USA_SITE_026	USA	0.730107	0.644019	0.613796	0.689186	0.534855	0.664083	0.762299
Morgan Monroe	USA_SITE_027	USA	0.843154	0.873776	0.758213	0.888495	0.71632	0.772686	0.862364
Mozark	USA_SITE_028	USA	0.798693	0.802276	0.863128	0.718094	0.819956	0.869479	0.799571
Neb Field 3	USA_SITE_029	USA	0.697791	0.505186	0.559876	0.677351	0.576095	0.674459	0.675857
Harvard Forest	USA_SITE_030	USA	0.795133	0.788466	0.817693	0.899048	0.741376	0.78188	0.863326
Howland	USA_SITE_031	USA	0.785845	0.752118	0.80378	0.82998	0.900208	0.594051	0.935398
Tonzi Ranch	USA_SITE_032	USA	0.966593	0.967814	0.929342	0.878783	0.962156	0.936241	0.961535
Soaproot	USA_SITE_033	USA	0.908373	0.830294	0.821857	0.647709	0.887605	0.899584	0.90051
P301	USA_SITE_034	USA	0.84533	0.739088	0.804413	0.514142	0.772392	0.755947	0.808101
Wind River	USA_SITE_035	USA	0.880161	0.882689	0.850433	0.934003	0.930031	0.928185	0.853226
Hauser Farm South	USA_SITE_037	USA	0.276291	0.145834	0.209716	0.339631	0.416579	0.137057	0.387146
Metolius	USA_SITE_038	USA	0.87354	0.816135	0.33937	0.937113	0.931503	0.903517	0.92494
Rosemount	USA_SITE_041	USA	0.460722	0.216439	0.167189	0.388229	0.2745	0.314654	0.454151
Park Falls	USA_SITE_042	USA	0.81044	0.610444	0.596233	0.745362	0.654668	0.599969	0.67464
UMBS	USA_SITE_043	USA	0.903718	0.732673	0.643463		0.849261		0.868764
Daniel Forest	USA_SITE_046	USA	0.895537	0.775023	0.731128	0.767985	0.893081	0.897751	0.862761
Tenderfoot Creek	USA_SITE_047	USA	0.889187	0.771405	0.842144	0.794169	0.928484	0.888868	0.87031
Fort Peck	USA_SITE_048	USA	0.80465	0.784145	0.790087	0.759109	0.813501	0.748097	0.797089
JERC	USA_SITE_052	USA	0.813559	0.585623	0.630314	0.724323	0.747235	0.820324	0.662677
Savannah River	USA_SITE_053	USA	0.866049	0.786862	0.637654	0.775543	0.77891	0.811401	0.608301
Freeman Ranch	USA_SITE_057	USA	0.904284	0.873186	0.9105	0.812338	0.863104	0.868217	0.878528
Sevilleta New Grass	USA_SITE_058	USA	0.259001	0.689612	0.622116	0.55033	0.583993	0.569426	0.774514
Lucky Hills	USA_SITE_060	USA	0.238355	0.310013	0.432958	0.302055	0.389378	0.413535	0.443873
Flag Wildfire	USA_SITE_061	USA	0.795477	0.594008	0.62724	0.640342	0.652345	0.691563	0.821216
Flag Ponderosa Pine	USA_SITE_062	USA	0.837193	0.537344	0.792931	0.698057	0.813718	0.845488	0.85907
Beltsville	USA_SITE_065	USA	0.782672	0.838104	0.823402	0.612672	0.732625	0.590876	0.81611
Jornada Mixed Shrubland	USA_SITE_072	USA	0.641794	0.785533	0.791486	0.739965	0.657419	0.827637	0.892343
AliceHolt	ALIC1	UK	0.698147	0.894916	0.928909	0.776148	0.858658	0.922341	0.935963
Balruddery	BALRD	UK	0.902432	0.635138	0.479925	0.788204	0.777828	0.582389	0.889316
BickleyHall	BICKL	UK	0.9116	0.862064	0.68418	0.870909	0.827128	0.87992	0.812148
BunnyPark	BUNNY	UK	0.94182	0.830637	0.639889	0.863684	0.862743	0.735136	0.882935
Cardington	CARDT	UK	0.855335	0.909392	0.876874	0.810316	0.812146	0.872913	0.903702
ChimneyMeadows	CHIMN	UK	0.810347	0.934675	0.865147	0.887442	0.906188	0.902261	0.899977
ChobhamCommon	CHOBH	UK	0.791555	0.912523	0.850283	0.861965	0.889007	0.9074	0.949458
Cochno	COCHN	UK	0.667554	0.881979	0.751854	0.665924	0.838259	0.806994	0.888889
CocklePark	COCLP	UK	0.670484	0.786017	0.652926		0.885888		0.913916
Crichton	CRICH	UK	0.776046	0.82689	0.685138	0.74222	0.716125	0.777635	0.790038
CwmGarw	CGARW	UK	0.79508	0.842677	0.619694	0.710452	0.666837		0.622872
EasterBush	EASTB	UK	0.849687	0.813783	0.516751	0.691282	0.815429	0.803473	0.773957
Elmsett	ELMST	UK	0.930602	0.933354	0.724056		0.873297	0.84127	0.903512
Euston	EUSTN	UK	0.934518	0.883366	0.644365	0.772603	0.806641	0.751045	0.827096
Fincham	FINCH	UK	0.824859	0.796752	0.716815	0.6836	0.767163	0.724401	0.808428
GisburnForest	GISBN	UK	0.750919	0.711644	0.590071	0.758268	0.695882	0.693587	0.680032
Glensaugh	GLENS	UK	0.450068	0.279558	0.220206	0.335611	0.368006	0.100852	0.322329
Glenwherry	GLENW	UK	0.682092		0.542783	-0.00843475	0.675882	0.706257	0.700325
Hadlow	HADLW	UK	0.937859	0.931105	0.880907	0.929276	0.927024	0.90414	0.921105
HartwoodHome	HARTW	UK	0.837387	0.802913	0.592871	0.713935	0.819008	0.782193	0.830811
HarwoodForest	HARWD	UK	0.786073	0.783291	0.462004	0.800953	0.753397	0.80542	0.809683
HenfaesFarm	HENFS	UK	0.834106	0.76959	0.762473	0.791016	0.762084		0.849923
Heytesbury	HYBRY	UK	0.76268	0.887635	0.728673	0.894566	0.876583	0.813373	0.828797
Hillsborough	HILLB	UK	0.713751	0.826818	0.738201	0.778058	0.758532	0.818844	0.812436
HollinHill	HOLLN	UK	0.856949	0.87522	0.761336	0.762695	0.818932	0.837724	0.894484
Loddington	LODTN	UK	0.723489	0.907511	0.732376	0.87419	0.865519	0.799026	0.910907
LullingtonHeath	LULLN	UK	0.874037	0.898369	0.635067	0.755861	0.879296		0.769676
MoorHouse	MOORH	UK	0.566296	0.778118	0.647293	0.719672	0.679489	0.716285	0.746248
Morley	MORLY	UK	0.842128	0.903886	0.626389	0.803814	0.844994		0.862845
NorthWyke	NWYKE	UK	0.853057	0.901457	0.833189	0.787715	0.893926	0.900371	0.912397
Plynlimon	PLYNL	UK	0.525635		0.453565		0.52159	0.624282	0.707733
PortonDown	PORTN	UK	0.803464	0.876609	0.695642	0.875579	0.812474	0.797992	0.845791
Redhill	REDHL	UK	0.811362	0.890586	0.626608	0.814371	0.835828	0.861463	0.741868
Redmere	RDMER	UK	0.69622	0.705318	0.328394	0.553633	0.470375	0.28389	0.666935
Riseholme	RISEH	UK	0.784908	0.830492	0.736729	0.86562	0.85433	0.773765	0.864677
Rothamsted	ROTHD	UK	0.868299	0.804317	0.648279	0.786652	0.784916	0.788032	0.873429
Sheepdrove	SHEEP	UK	0.882256	0.854687	0.755224	0.881596	0.81029	0.80653	0.847875
Sourhope	SOURH	UK	0.746573	0.730576	0.704095	0.759274	0.804541	0.799798	0.792586
SpenFarm	SPENF	UK	0.818372	0.829369	0.681598	0.829858	0.850837	0.838952	0.841085
Stiperstones	STIPS	UK	0.840373	0.834559	0.680085	0.867979	0.781426	0.814892	0.845976
Stoughton	STGHT	UK	0.910567	0.886059	0.641033	0.863213	0.896444	0.800575	0.893004
TadhamMoor	TADHM	UK	0.626758	0.590989	0.557408	0.648475	0.538157	0.577049	0.735463
TheLizard	LIZRD	UK	0.876192		0.765878		0.843207		0.925433
Waddesdon	WADDN	UK	0.789487	0.918954	0.916303	0.851273	0.908449	0.889316	0.903841
Writtle	WRTTL	UK	0.87554	0.921609	0.872286	0.826276	0.942135	0.854258	0.892306
Aas	AAC001	Norway	0.793953	0.7691	0.403827	0.61504	0.794981	0.66833	0.593605
Acheleschwaig	ACC001	Germany	0.700053	0.856572	0.670065	0.546699	0.628956	0.798801	0.810171
Agia	AGCK003	Greece	0.853529	0.713087	0.748579	0.731999	0.750147	0.795422	0.811442
Alento1	ALC001	Italy	0.956216		0.907911	0.940943	0.924981		0.870305
Alento2	ALC002	Italy	0.939469		0.84873	0.923129	0.914469		0.819446
Calderona1	CAC001	Spain	0.83359	0.853327	0.875952	0.666391	0.770253		0.793114
Crolles	CRC001	France	0.752377	0.599071	0.546299	0.646348	0.744309	0.655718	0.687402
Cunnersdorf	CUC001	Germany	0.858384	0.804841	0.815997	0.890898	0.845308	0.801008	0.923765
Derlo	DEC001	Poland	0.903607	0.827726	0.761426	0.645595	0.825573	0.812746	0.875357
Fendt	FEC001	Germany	0.720249	0.729446	0.788529	0.606504	0.848624	0.812465	0.782619
Fuerstensee	FSC001	Germany	0.897734	0.810289	0.65798	0.824012	0.817095	0.813876	0.925106
Grosses Bruch	GBC001	Germany	0.842234	0.880053	0.736892	0.799518	0.780421	0.778293	0.887942
Gludsted	GLC001	Denmark	0.862209	0.874444	0.522449	0.839855	0.834276	0.782308	0.877959
Harrild	HAC001	Denmark	0.661703	0.654426	0.29426	0.671481	0.637159	0.550338	0.747957
Hordorf	HDC001	Germany	0.704276	0.724618	0.569272	0.620427	0.718956	0.645955	0.707902
Serrahn	HHC001	Germany	0.902093	0.86507	0.807365	0.840268	0.882331	0.912559	0.919936
Hohes Holz	HOC001	Germany	0.76415	0.759782	0.782038	0.849669	0.795944	0.839998	0.848188
Jena	JEC001	Germany	0.849933	0.842181	0.674792	0.577846	0.804347	0.674178	0.902405
Merzenhausen	MEBCK001	Germany	0.939784	0.833187	0.658354	0.850668	0.828169	0.755101	0.886182
Olocau	OLC001	Spain	0.809431	0.809229	0.815532	0.515759	0.745732	0.814888	0.794695
Petzenkirchen	PEC001	Austria	0.893119	0.728129	0.544823	0.617529	0.797086	0.790606	0.509719
Rietholzbach	RIC001	Switzerland	0.810096	0.765948	0.614286	0.657742	0.814633	0.808653	0.882273
Rollesbroich1	ROC001	Germany	0.819439	0.66515	0.587402	0.723546	0.790413	0.747238	0.742298
Rollesbroich2	ROC002	Germany	0.806017	0.728461	0.655522	0.753658	0.820709	0.767068	0.778988
Schoeneseiffen	RUBCDKR001	Germany	0.931892	0.818341	0.735136	0.867915	0.896747	0.802929	0.832534
Gevenich	RUBCK002	Germany	0.918677	0.799423	0.617861	0.803137	0.817356	0.693526	0.807989
Ruraue	RUBCK003	Germany	0.88397	0.872608	0.75142	0.867674	0.847674	0.831821	0.926775
Wildenrath	RUBCK004	Germany	0.901426	0.888434	0.752414	0.842808	0.877145	0.845133	0.873827
Heinsberg	RUC004	Germany	0.896677	0.848062	0.714718	0.850588	0.868601	0.801607	0.911885
Kall	RUC005	Germany	0.857104	0.695977	0.592886	0.771427	0.785574	0.681835	0.852699
Aachen	RUC006	Germany	0.90637	0.811134	0.627173	0.816847	0.841464	0.757213	0.903964
Kleinhau1	RUC007	Germany	0.939897	0.839699	0.742673	0.890247	0.888152	0.80338	0.87555
Saerheim	SAC001	Norway			0.661942		0.785489		0.789918
Schaefertal1	SCC001	Germany	0.89773	0.716455	0.639702	0.690405	0.79988	0.593497	0.860213
Schaefertal4	SCC004	Germany	0.894114	0.704462	0.686037	0.634138	0.814341	0.60055	0.778818
Selhausen	SEC001	Germany	0.798037	0.703063	0.548568	0.708139	0.728418	0.620551	0.701768
Toulouse	TOC001	France	0.947319	0.899475	0.877711	0.819022	0.887292	0.8638	0.892618
Voulund	VOC001	Denmark	0.839745	0.815281	0.28473	0.833628	0.823287	0.6728	0.787569
Wildacker	WAC001	Germany	0.861742	0.906885	0.866187	0.752126	0.906791	0.872354	0.910762
Wuestebach1	WUC001	Germany	0.719524	0.519639	0.501458	0.641998	0.699848	0.678419	0.631703
Wuestebach2	WUC002	Germany	0.64706	0.486309	0.508405	0.508837	0.646572	0.573972	0.590926
Baldry	AUS_SITE_001	Australia	0.51284	0.851715	0.89692	0.644772	0.805043	0.819838	0.872172
Daly	AUS_SITE_002	Australia	0.476693	0.791504	0.680131	0.800649	0.772702	0.740946	0.766988
Gnangara	AUS_SITE_003	Australia	0.589084		0.915636	0.86151	0.850197	0.86795	0.881419
Robson	AUS_SITE_006	Australia	0.534711	0.75127	0.701397	0.771757	0.795079		0.855255
Temora	AUS_SITE_007	Australia	0.517527	0.761267	0.835946	0.631871	0.891685	0.811738	0.808141
Tullochgorum	AUS_SITE_008	Australia	0.403095	0.685351	0.909325	0.549958	0.780061	0.82495	0.758093
Tumbarumba	AUS_SITE_009	Australia	0.642139	0.795804	0.718068	0.626671	0.730746	0.804083	0.6749
Weany Creek	AUS_SITE_010	Australia	0.548659	0.775647	0.764663	0.68351	0.771584	0.757157	0.824967
Yanco	AUS_SITE_011	Australia	0.492945	0.670689	0.612797	0.647683	0.633174	0.692433	0.646205
Hamilton	AUS_SITE_015	Australia	0.771116	0.835976	0.887034	0.798033	0.790421	0.814105	0.920539
Bishes	AUS_SITE_018	Australia	0.843818	0.815553	0.663083	0.822217	0.827104	0.659126	0.803035

## Sheet: 3Rano
CRNS site name	Station ID	Country	ERA5-Land	CFSv2	MERRA2	JRA55	GLDAS	CRA40	GLEAM
Manitou Forest Tower	USA_SITE_004	USA	0.69238	0.614632	0.673778	0.541661	0.413724	0.749161	0.730637
Marshall Colorado	USA_SITE_006	USA	0.719867	0.547586	0.739002	0.542071	0.302417	0.76958	0.750349
Kendall	USA_SITE_010	USA	0.44061	0.493755	0.599876	0.430624	0.461858	0.613559	0.707087
Santa Rita Creosote	USA_SITE_011	USA	0.701937	0.61435	0.65543	0.484215	0.52809	0.722474	0.821805
SMAP-OK	USA_SITE_014	USA	0.743239	0.670883	0.736194	0.615592	0.516384	0.765769	0.8004
ARM-1	USA_SITE_015	USA	0.764697	0.71223	0.767251	0.642599	0.592332	0.794905	0.839047
Iowa Validation Site	USA_SITE_016	USA	0.656116	0.584724	0.650614	0.592354	0.451535	0.68077	0.630275
San Pedro 2	USA_SITE_020	USA	0.289158	0.576273	0.538273	0.428275	0.446821	0.511797	0.634449
Desert Chaparral UCI	USA_SITE_023	USA	0.712627	0.746843	0.654876	0.503727	0.33631	0.765823	0.742675
Coastal Sage UCI	USA_SITE_024	USA	0.841956	0.795159	0.688292	0.687846	0.368861	0.740589	0.779769
Chestnut Ridge NOAA	USA_SITE_025	USA	0.52991	0.548596	0.568376	0.489563	0.419027	0.467197	0.526923
Bondville	USA_SITE_026	USA	0.583491	0.581845	0.569623	0.555018	0.402636	0.559733	0.625755
Morgan Monroe	USA_SITE_027	USA	0.539442	0.551301	0.564359	0.454365	0.336382	0.414518	0.55131
Mozark	USA_SITE_028	USA	0.632621	0.615068	0.698325	0.652229	0.555312	0.684079	0.654251
Neb Field 3	USA_SITE_029	USA	0.636784	0.613486	0.664237	0.518828	0.474318	0.732575	0.663351
Harvard Forest	USA_SITE_030	USA	0.663122	0.565532	0.663878	0.532647	0.403563	0.582391	0.526482
Howland	USA_SITE_031	USA	0.695911	0.590438	0.643861	0.633432	0.454089	0.545257	0.491338
Tonzi Ranch	USA_SITE_032	USA	0.847669	0.796626	0.760676	0.564779	0.591661	0.764693	0.732545
Soaproot	USA_SITE_033	USA	0.807136	0.747413	0.719753	0.603083	0.709072	0.812	0.751892
P301	USA_SITE_034	USA	0.814215	0.676927	0.839162	0.448534	0.677834	0.813671	0.74003
Wind River	USA_SITE_035	USA	0.576328	0.6081	0.453172	0.56322	0.354682	0.569839	0.475285
Hauser Farm South	USA_SITE_037	USA	0.323518	0.233341	0.277937	0.280889	0.237764	0.270061	0.355937
Metolius	USA_SITE_038	USA	0.703588	0.61232	0.67878	0.588067	0.622715	0.754961	0.763225
Rosemount	USA_SITE_041	USA	0.673989	0.606551	0.664975	0.633811	0.546091	0.686364	0.69223
Park Falls	USA_SITE_042	USA	0.73299	0.639083	0.697932	0.51056	0.491753	0.720033	0.607917
UMBS	USA_SITE_043	USA	0.734972	0.637076	0.657006		0.458173		0.727722
Daniel Forest	USA_SITE_046	USA	0.614425	0.502681	0.723518	0.5705	0.61778	0.672807	0.777025
Tenderfoot Creek	USA_SITE_047	USA	0.484467	0.362923	0.473737	0.568366	0.504628	0.579455	0.559818
Fort Peck	USA_SITE_048	USA	0.664773	0.695941	0.568846	0.516196	0.541437	0.725986	0.663666
JERC	USA_SITE_052	USA	0.766498	0.681966	0.702691	0.723866	0.629679	0.76258	0.768084
Savannah River	USA_SITE_053	USA	0.797637	0.775017	0.721819	0.691183	0.514286	0.771266	0.744843
Freeman Ranch	USA_SITE_057	USA	0.757046	0.737915	0.685984	0.677204	0.663519	0.754101	0.721701
Sevilleta New Grass	USA_SITE_058	USA	0.393754	0.541837	0.559741	0.510667	0.508935	0.665392	0.749989
Lucky Hills	USA_SITE_060	USA	0.337552	0.464703	0.570723	0.345373	0.406166	0.487945	0.579751
Flag Wildfire	USA_SITE_061	USA	0.728189	0.589503	0.651858	0.44493	0.50812	0.731506	0.734821
Flag Ponderosa Pine	USA_SITE_062	USA	0.743044	0.533046	0.602897	0.509115	0.521596	0.729554	0.715978
Beltsville	USA_SITE_065	USA	0.610893	0.617642	0.643788	0.611332	0.415792	0.497628	0.6026
Jornada Mixed Shrubland	USA_SITE_072	USA	0.682044	0.62048	0.643899	0.637878	0.520645	0.764413	0.821465
AliceHolt	ALIC1	UK	0.451673	0.396139	0.421036	0.396236	0.235902	0.447736	0.332107
Balruddery	BALRD	UK	0.709711	0.647859	0.61332	0.600618	0.389143	0.591642	0.656611
BickleyHall	BICKL	UK	0.731096	0.695799	0.622907	0.690131	0.451612	0.717806	0.500701
BunnyPark	BUNNY	UK	0.84704	0.744055	0.711207	0.696553	0.49392	0.818586	0.742565
Cardington	CARDT	UK	0.714895	0.610967	0.636862	0.59559	0.441805	0.74054	0.670316
ChimneyMeadows	CHIMN	UK	0.477883	0.577274	0.559072	0.548064	0.409045	0.61053	0.5786
ChobhamCommon	CHOBH	UK	0.541227	0.543947	0.553429	0.517867	0.312418	0.593999	0.433277
Cochno	COCHN	UK	0.0164223	0.486483	0.495014	0.409299	0.36445	0.435154	0.403753
CocklePark	COCLP	UK	0.219411	0.636914	0.592101		0.263626		0.560245
Crichton	CRICH	UK	0.480923	0.608892	0.60434	0.551976	0.438091	0.596695	0.409777
CwmGarw	CGARW	UK	0.525222	0.643723	0.538748	0.537863	0.499018		0.544264
EasterBush	EASTB	UK	0.608229	0.554761	0.569955	0.524285	0.348084	0.542129	0.62572
Elmsett	ELMST	UK	0.743688	0.649776	0.600711		0.531048	0.73877	0.567779
Euston	EUSTN	UK	0.794332	0.734083	0.711773	0.708964	0.494658	0.810693	0.590069
Fincham	FINCH	UK	0.718002	0.643387	0.660942	0.62427	0.533263	0.765917	0.578566
GisburnForest	GISBN	UK	0.333219	0.319789	0.330656	0.318399	0.235583	0.3263	0.318535
Glensaugh	GLENS	UK	0.309082	0.238813	0.29602	0.270541	0.188476	0.271285	0.242935
Glenwherry	GLENW	UK	0.35974		0.361126	0.224927	0.31662	0.317737	0.245231
Hadlow	HADLW	UK	0.717527	0.65239	0.656595	0.50701	0.508038	0.707298	0.439909
HartwoodHome	HARTW	UK	0.493427	0.528658	0.499565	0.462391	0.371081	0.50461	0.431632
HarwoodForest	HARWD	UK	0.365956	0.378488	0.366758	0.333364	0.0812418	0.318783	0.313021
HenfaesFarm	HENFS	UK	0.625017	0.586277	0.554861	0.563348	0.409037		0.522737
Heytesbury	HYBRY	UK	0.411663	0.673563	0.599173	0.586882	0.37361	0.685391	0.497273
Hillsborough	HILLB	UK	0.305154	0.573141	0.55199	0.55361	0.395094	0.614379	0.415558
HollinHill	HOLLN	UK	0.61036	0.575146	0.495671	0.532021	0.342189	0.581753	0.429606
Loddington	LODTN	UK	0.389257	0.50767	0.503639	0.509187	0.376891	0.602036	0.533955
LullingtonHeath	LULLN	UK	0.54209	0.671682	0.634364	0.501822	0.515242		0.553746
MoorHouse	MOORH	UK	0.197953	0.45773	0.497916	0.481582	0.343925	0.478054	0.403586
Morley	MORLY	UK	0.618596	0.705164	0.637095	0.714206	0.448536		0.594915
NorthWyke	NWYKE	UK	0.474098	0.605167	0.6236	0.627409	0.48874	0.644501	0.4624
Plynlimon	PLYNL	UK	0.280703		0.382945		0.327867	0.463356	0.449413
PortonDown	PORTN	UK	0.568315	0.757631	0.669984	0.703184	0.514358	0.824175	0.624946
Redhill	REDHL	UK	0.673463	0.664272	0.651908	0.524218	0.513926	0.739282	0.531686
Redmere	RDMER	UK	0.263251	0.227139	0.252108	0.247	0.154508	0.266622	0.241926
Riseholme	RISEH	UK	0.465477	0.623354	0.567613	0.577188	0.372892	0.692956	0.654361
Rothamsted	ROTHD	UK	0.603299	0.67289	0.678452	0.659625	0.496309	0.782912	0.686136
Sheepdrove	SHEEP	UK	0.634871	0.586031	0.569218	0.571082	0.446957	0.619183	0.61261
Sourhope	SOURH	UK	0.244046	0.430851	0.458007	0.436644	0.257226	0.424378	0.286277
SpenFarm	SPENF	UK	0.577771	0.689919	0.651426	0.657972	0.445356	0.740626	0.552314
Stiperstones	STIPS	UK	0.511703	0.553577	0.569005	0.560547	0.352873	0.561916	0.424658
Stoughton	STGHT	UK	0.720402	0.628145	0.638288	0.679608	0.454856	0.732452	0.66526
TadhamMoor	TADHM	UK	0.130246	0.139492	0.138204	0.128278	0.113759	0.132895	0.0909761
TheLizard	LIZRD	UK	0.536878		0.56009		0.472292		0.617644
Waddesdon	WADDN	UK	0.55985	0.465791	0.4834	0.503893	0.367445	0.510582	0.516225
Writtle	WRTTL	UK	0.692312	0.599057	0.555779	0.442325	0.403961	0.68496	0.550104
Aas	AAC001	Norway	0.759496	0.719709	0.521804	0.605346	0.520584	0.672704	0.567116
Acheleschwaig	ACC001	Germany	0.800094	0.688685	0.626866	0.687533	0.46767	0.729354	0.557783
Agia	AGCK003	Greece	0.706547	0.623103	0.597016	0.62525	0.514655	0.687464	0.617841
Alento1	ALC001	Italy	0.728875		0.45553	0.618756	0.347028		0.546256
Alento2	ALC002	Italy	0.774306		0.622488	0.642405	0.510761		0.651485
Calderona1	CAC001	Spain	0.821923	0.778203	0.720072	0.587581	0.539746		0.678375
Crolles	CRC001	France	0.670097	0.551926	0.376825	0.548486	0.42273	0.612281	0.459311
Cunnersdorf	CUC001	Germany	0.622825	0.558589	0.589353	0.526582	0.339869	0.646131	0.626491
Derlo	DEC001	Poland	0.790791	0.726463	0.698213	0.60965	0.680263	0.751009	0.763539
Fendt	FEC001	Germany	0.703247	0.641228	0.640917	0.677685	0.55055	0.56314	0.5287
Fuerstensee	FSC001	Germany	0.812628	0.724169	0.753237	0.673779	0.586081	0.799836	0.726171
Grosses Bruch	GBC001	Germany	0.597841	0.530932	0.553384	0.422754	0.376459	0.571295	0.545422
Gludsted	GLC001	Denmark	0.695058	0.676016	0.58021	0.665914	0.487308	0.677664	0.655925
Harrild	HAC001	Denmark	0.69547	0.684173	0.533973	0.683847	0.53952	0.719292	0.642566
Hordorf	HDC001	Germany	0.63399	0.598025	0.559365	0.457273	0.333973	0.580796	0.598477
Serrahn	HHC001	Germany	0.671477	0.641636	0.671448	0.545751	0.486218	0.703608	0.622083
Hohes Holz	HOC001	Germany	0.615005	0.548113	0.570954	0.353731	0.348741	0.581393	0.524053
Jena	JEC001	Germany	0.800525	0.66948	0.675109	0.704591	0.530751	0.658353	0.742516
Merzenhausen	MEBCK001	Germany	0.755002	0.704093	0.678471	0.63434	0.491754	0.522491	0.63376
Olocau	OLC001	Spain	0.712539	0.716478	0.660238	0.578199	0.469677	0.728994	0.64491
Petzenkirchen	PEC001	Austria	0.75212	0.636432	0.66921	0.505316	0.511316	0.652529	0.585185
Rietholzbach	RIC001	Switzerland	0.74541	0.592397	0.565475	0.580311	0.487861	0.489478	0.546812
Rollesbroich1	ROC001	Germany	0.660936	0.58308	0.538946	0.566379	0.442323	0.462298	0.491164
Rollesbroich2	ROC002	Germany	0.625706	0.538909	0.533885	0.534946	0.41818	0.436472	0.466197
Schoeneseiffen	RUBCDKR001	Germany	0.737996	0.628906	0.554982	0.640999	0.502753	0.657859	0.541938
Gevenich	RUBCK002	Germany	0.758019	0.711985	0.674581	0.662156	0.502245	0.526301	0.62223
Ruraue	RUBCK003	Germany	0.72315	0.66202	0.649665	0.613132	0.462573	0.507491	0.577506
Wildenrath	RUBCK004	Germany	0.794695	0.69088	0.664598	0.673362	0.539062	0.696021	0.697427
Heinsberg	RUC004	Germany	0.751437	0.691441	0.653089	0.631217	0.495527	0.66403	0.658083
Kall	RUC005	Germany	0.703405	0.606796	0.5818	0.588668	0.513527	0.571461	0.608378
Aachen	RUC006	Germany	0.738955	0.658238	0.660546	0.624801	0.490402	0.517297	0.633527
Kleinhau1	RUC007	Germany	0.706266	0.573862	0.533809	0.61854	0.454297	0.637343	0.532968
Saerheim	SAC001	Norway			0.632838		0.512354		0.696825
Schaefertal1	SCC001	Germany	0.49854	0.408228	0.378212	0.29654	0.334065	0.39817	0.443781
Schaefertal4	SCC004	Germany	0.488335	0.466346	0.456666	0.265955	0.309441	0.417977	0.393989
Selhausen	SEC001	Germany	0.716736	0.665913	0.631631	0.595795	0.482123	0.69054	0.599774
Toulouse	TOC001	France	0.795942	0.659024	0.6863	0.674288	0.518074	0.568367	0.759245
Voulund	VOC001	Denmark	0.763208	0.765661	0.645864	0.729173	0.582141	0.734551	0.72727
Wildacker	WAC001	Germany	0.738128	0.69883	0.700094	0.629467	0.568258	0.718243	0.659149
Wuestebach1	WUC001	Germany	0.495871	0.458291	0.456509	0.434411	0.31996	0.417322	0.421552
Wuestebach2	WUC002	Germany	0.573751	0.483263	0.483946	0.503261	0.417908	0.589789	0.530875
Baldry	AUS_SITE_001	Australia	0.662391	0.771298	0.781355	0.647614	0.658199	0.751546	0.843426
Daly	AUS_SITE_002	Australia	0.455023	0.546973	0.531854	0.383974	0.598095	0.578394	0.714908
Gnangara	AUS_SITE_003	Australia	0.608609		0.696745	0.620188	0.287614	0.567011	0.700023
Robson	AUS_SITE_006	Australia	0.499942	0.481186	0.579366	0.510409	0.430192		0.576879
Temora	AUS_SITE_007	Australia	0.662601	0.706184	0.665534	0.585827	0.573172	0.718687	0.77514
Tullochgorum	AUS_SITE_008	Australia	0.619957	0.71424	0.737993	0.534273	0.445066	0.631612	0.649362
Tumbarumba	AUS_SITE_009	Australia	0.597104	0.56034	0.577037	0.543741	0.371202	0.519485	0.516337
Weany Creek	AUS_SITE_010	Australia	0.695484	0.739418	0.646699	0.640124	0.635444	0.706155	0.818722
Yanco	AUS_SITE_011	Australia	0.621347	0.647938	0.60138	0.576957	0.504969	0.710619	0.741933
Hamilton	AUS_SITE_015	Australia	0.711519	0.605232	0.591338	0.496561	0.285296	0.687411	0.564974
Bishes	AUS_SITE_018	Australia	0.786217	0.716418	0.538868	0.62298	0.474818	0.788556	0.795288

## Sheet: 4MSE
CRNS site name	Station ID	Country	ERA5-Land	CFSv2	MERRA2	JRA55	GLDAS	CRA40	GLEAM
Manitou Forest Tower	USA_SITE_004	USA	0.0126729	0.025373	0.00419026	0.00509808	0.00419305	0.00263091	0.00946845
Marshall Colorado	USA_SITE_006	USA	0.0103035	0.00341501	0.00262303	0.00313921	0.0205952	0.00260641	0.00555747
Kendall	USA_SITE_010	USA	0.0160439	0.0194951	0.00398576	0.00276866	0.00368948	0.00366714	0.00308135
Santa Rita Creosote	USA_SITE_011	USA	0.00909758	0.0167422	0.01058	0.00870591	0.0144906	0.0128238	0.0128827
SMAP-OK	USA_SITE_014	USA	0.00869663	0.00440509	0.00356799	0.012856	0.00529692	0.00294624	0.0185386
ARM-1	USA_SITE_015	USA	0.0157902	0.0114706	0.00548813	0.0308926	0.012548	0.00864147	0.0434059
Iowa Validation Site	USA_SITE_016	USA	0.00571359	0.00733592	0.00876395	0.0049218	0.00531131	0.00786124	0.0149183
San Pedro 2	USA_SITE_020	USA	0.00372009	0.0178196	0.00408367	0.00360166	0.00409252	0.00422865	0.00420336
Desert Chaparral UCI	USA_SITE_023	USA	0.0168017	0.0266564	0.011754	0.0090477	0.0112453	0.00382266	0.0107308
Coastal Sage UCI	USA_SITE_024	USA	0.00329401	0.0152086	0.00825628	0.00522398	0.0203578	0.010965	0.013553
Chestnut Ridge NOAA	USA_SITE_025	USA	0.0175336	0.00262913	0.00259217	0.00195608	0.00195273	0.00154635	0.009376
Bondville	USA_SITE_026	USA	0.0102273	0.0169753	0.0117727	0.0131602	0.0106119	0.0173792	0.00174645
Morgan Monroe	USA_SITE_027	USA	0.0121885	0.0210817	0.0109944	0.0161154	0.0136473	0.0137202	0.00601491
Mozark	USA_SITE_028	USA	0.00394104	0.00287778	0.00215408	0.00300024	0.00188538	0.00130827	0.00669978
Neb Field 3	USA_SITE_029	USA	0.0027623	0.00726291	0.00547567	0.0022839	0.00337611	0.00560047	0.00513258
Harvard Forest	USA_SITE_030	USA	0.0602641	0.0512847	0.0676259	0.0282088	0.0397109	0.0386354	0.0337827
Howland	USA_SITE_031	USA	0.0419331	0.0421253	0.0308476	0.017605	0.0167074	0.0311856	0.0202291
Tonzi Ranch	USA_SITE_032	USA	0.00296279	0.0060728	0.00542232	0.00640545	0.00633851	0.00490641	0.00769678
Soaproot	USA_SITE_033	USA	0.0159101	0.00610348	0.00787672	0.00401133	0.00145686	0.00198219	0.0134017
P301	USA_SITE_034	USA	0.0574053	0.0313213	0.0187321	0.00977106	0.00576566	0.00718868	0.0353421
Wind River	USA_SITE_035	USA	0.0030694	0.00101328	0.00443039	0.00352179	0.0101813	0.00709222	0.00663848
Hauser Farm South	USA_SITE_037	USA	0.0530868	0.0219303	0.0155445	0.00616127	0.00766388	0.0134199	0.00946584
Metolius	USA_SITE_038	USA	0.00133224	0.00198569	0.0115649	0.00623896	0.00522194	0.00789127	0.0172503
Rosemount	USA_SITE_041	USA	0.00345229	0.0069214	0.00445759	0.00845364	0.00606708	0.00337369	0.0234559
Park Falls	USA_SITE_042	USA	0.00387678	0.0100924	0.00281814	0.0132084	0.0178877	0.0132112	0.0163189
UMBS	USA_SITE_043	USA	0.00991967	0.00899767	0.00894013		0.000820104		0.0116614
Daniel Forest	USA_SITE_046	USA	0.0176066	0.0213334	0.013108	0.00855557	0.00644217	0.00464597	0.0174232
Tenderfoot Creek	USA_SITE_047	USA	0.0125864	0.0152043	0.00836584	0.00739713	0.00593554	0.00479194	0.00795214
Fort Peck	USA_SITE_048	USA	0.010804	0.0145503	0.00323371	0.00676233	0.00237345	0.00186272	0.0147568
JERC	USA_SITE_052	USA	0.00786827	0.0475788	0.0228878	0.0388919	0.00140501	0.0078428	0.0546073
Savannah River	USA_SITE_053	USA	0.011103	0.0096879	0.0168308	0.0441313	0.00175412	0.0107595	0.0527162
Freeman Ranch	USA_SITE_057	USA	0.0152819	0.00324862	0.00342903	0.00229244	0.00256252	0.00217527	0.00937413
Sevilleta New Grass	USA_SITE_058	USA	0.019824	0.0322216	0.0118371	0.0104517	0.00254524	0.0048804	0.0090917
Lucky Hills	USA_SITE_060	USA	0.00671462	0.0319798	0.0101656	0.00753978	0.0111866	0.010993	0.0122333
Flag Wildfire	USA_SITE_061	USA	0.00604651	0.00785248	0.00378715	0.0058718	0.00401778	0.00297357	0.00623933
Flag Ponderosa Pine	USA_SITE_062	USA	0.00356159	0.00668233	0.00692649	0.0117539	0.0082139	0.00664126	0.00442775
Beltsville	USA_SITE_065	USA	0.00795099	0.00320303	0.00289343	0.0056568	0.0067407	0.00602818	0.0155884
Jornada Mixed Shrubland	USA_SITE_072	USA	0.0185202	0.0352315	0.00655156	0.010946	0.00873532	0.00854172	0.00553059
AliceHolt	ALIC1	UK	0.0139608	0.00310584	0.00151434	0.00429882	0.0131856	0.00985669	0.00253015
Balruddery	BALRD	UK	0.00271777	0.00136151	0.00240021	0.00134524	0.00179825	0.00236193	0.0190527
BickleyHall	BICKL	UK	0.00374202	0.00279473	0.00498121	0.004201	0.0055441	0.00673289	0.00417496
BunnyPark	BUNNY	UK	0.0197149	0.0222834	0.0196791	0.0108975	0.00931075	0.0033187	0.0233888
Cardington	CARDT	UK	0.049577	0.0181601	0.0117334	0.0087256	0.016016	0.00524122	0.0216914
ChimneyMeadows	CHIMN	UK	0.00270665	0.00206716	0.00170991	0.00434634	0.00333099	0.00386501	0.00425774
ChobhamCommon	CHOBH	UK	0.0349627	0.0521447	0.0538972	0.0652451	0.0926587	0.0801787	0.0638836
Cochno	COCHN	UK	0.0154183	0.00374785	0.00249742	0.00795236	0.0140184	0.00412042	0.00418617
CocklePark	COCLP	UK	0.0082843	0.0136833	0.00549578		0.0155971		0.00439087
Crichton	CRICH	UK	0.00765166	0.0275255	0.00709492	0.0155019	0.0242727	0.021004	0.0375933
CwmGarw	CGARW	UK	0.0165444	0.0493634	0.0242229	0.0302274	0.0476291		0.013173
EasterBush	EASTB	UK	0.00478197	0.00376526	0.00269905	0.00314604	0.00538062	0.00418128	0.00274931
Elmsett	ELMST	UK	0.000831638	0.0245138	0.0123862		0.00625661	0.0185083	0.00145957
Euston	EUSTN	UK	0.00586581	0.00572136	0.0155077	0.0241137	0.0107056	0.009673	0.0232092
Fincham	FINCH	UK	0.00686078	0.00265405	0.00156123	0.00313722	0.00159252	0.00220901	0.0028076
GisburnForest	GISBN	UK	0.0415754	0.0565667	0.0503202	0.0695868	0.0903766	0.091047	0.0815875
Glensaugh	GLENS	UK	0.0769796	0.0469619	0.0913511	0.0490529	0.0621722	0.0653252	0.0394086
Glenwherry	GLENW	UK	0.0494939		0.0430602	0.075097	0.0582327	0.0612734	0.0379958
Hadlow	HADLW	UK	0.00122994	0.00275585	0.00273863	0.00882725	0.0100278	0.0108525	0.00335849
HartwoodHome	HARTW	UK	0.00656423	0.0463058	0.0305511	0.0464808	0.035725	0.0579122	0.0122631
HarwoodForest	HARWD	UK	0.161343	0.181582	0.168846	0.212659	0.235053	0.228109	0.256805
HenfaesFarm	HENFS	UK	0.0218678	0.0208245	0.0144565	0.0225825	0.0276499		0.00575079
Heytesbury	HYBRY	UK	0.00582439	0.0060342	0.00396821	0.00499575	0.00339988	0.00463191	0.00393488
Hillsborough	HILLB	UK	0.00697342	0.00570847	0.00289545	0.0111676	0.00445221	0.0119575	0.00366313
HollinHill	HOLLN	UK	0.00657481	0.0069529	0.0167413	0.0162997	0.0282677	0.0233614	0.00483544
Loddington	LODTN	UK	0.0300143	0.0193132	0.0290466	0.039898	0.0266255	0.0395541	0.0127768
LullingtonHeath	LULLN	UK	0.0140894	0.00214226	0.00457491	0.00607677	0.00287041		0.00394316
MoorHouse	MOORH	UK	0.0930336	0.0640937	0.060538	0.0932872	0.113123	0.107738	0.103142
Morley	MORLY	UK	0.0420899	0.00153375	0.00272434	0.00329623	0.00124303		0.00340779
NorthWyke	NWYKE	UK	0.0179892	0.0177836	0.0192733	0.0258552	0.0410605	0.0331214	0.00808933
Plynlimon	PLYNL	UK	0.0149313		0.0430106		0.0698051	0.0720113	0.0188862
PortonDown	PORTN	UK	0.00383893	0.00439847	0.00339941	0.0054423	0.00484934	0.00471459	0.0027897
Redhill	REDHL	UK	0.00907753	0.0053134	0.00472131	0.00125366	0.00166464	0.000922001	0.016248
Redmere	RDMER	UK	0.00939557	0.203887	0.159383	0.139344	0.172272	0.168212	0.178904
Riseholme	RISEH	UK	0.0018413	0.00227533	0.00254212	0.00261627	0.00172875	0.00532381	0.00498585
Rothamsted	ROTHD	UK	0.00679147	0.0053148	0.00312997	0.001818	0.00267713	0.00153279	0.00256871
Sheepdrove	SHEEP	UK	0.0105153	0.00317292	0.00298048	0.00524019	0.00478382	0.00558204	0.00434093
Sourhope	SOURH	UK	0.029747	0.033646	0.0199228	0.0403052	0.044906	0.0454871	0.0670479
SpenFarm	SPENF	UK	0.00555776	0.00213654	0.00233088	0.001416	0.00185648	0.00224279	0.00419398
Stiperstones	STIPS	UK	0.0336165	0.0538545	0.0471583	0.0511705	0.0676408	0.0751311	0.0206842
Stoughton	STGHT	UK	0.0161737	0.00240796	0.00239731	0.00197732	0.00269061	0.00727158	0.00279738
TadhamMoor	TADHM	UK	0.0780146	0.14436	0.101306	0.120569	0.116742	0.147347	0.0705261
TheLizard	LIZRD	UK	0.0375266		0.0559246		0.0916957		0.0335905
Waddesdon	WADDN	UK	0.00865705	0.00388518	0.00479457	0.00988492	0.00806056	0.013297	0.00358471
Writtle	WRTTL	UK	0.0125561	0.00479279	0.00905453	0.0110951	0.00700213	0.00747507	0.00544432
Aas	AAC001	Norway	0.00212458	0.00315289	0.007303	0.0130919	0.00373814	0.00448769	0.0241013
Acheleschwaig	ACC001	Germany	0.00314764	0.00290391	0.00233225	0.00264453	0.00440783	0.00502495	0.00527606
Agia	AGCK003	Greece	0.00771576	0.0254728	0.00565777	0.00509157	0.00547993	0.00499156	0.0112742
Alento1	ALC001	Italy	0.00713728		0.00216702	0.00113792	0.00144563		0.00326211
Alento2	ALC002	Italy	0.00822031		0.00355401	0.0015572	0.00200718		0.00500895
Calderona1	CAC001	Spain	0.00193245	0.00095565	0.00107664	0.00390494	0.00149687		0.00311091
Crolles	CRC001	France	0.0143243	0.0033753	0.00383508	0.00267208	0.00706315	0.00252756	0.00933985
Cunnersdorf	CUC001	Germany	0.0153267	0.00928377	0.00783709	0.00513377	0.00719094	0.00392797	0.0111868
Derlo	DEC001	Poland	0.0221504	0.00343391	0.00235702	0.0197092	0.00473344	0.00314932	0.0132092
Fendt	FEC001	Germany	0.00188615	0.00306865	0.00573724	0.00881307	0.0134763	0.0113109	0.00194369
Fuerstensee	FSC001	Germany	0.0374486	0.0282032	0.0188141	0.0230879	0.0146815	0.0109032	0.0253309
Grosses Bruch	GBC001	Germany	0.0106237	0.00198347	0.00350739	0.0021271	0.00326813	0.00218228	0.0083047
Gludsted	GLC001	Denmark	0.00829612	0.00586462	0.00805563	0.0066989	0.0128887	0.0107863	0.0165449
Harrild	HAC001	Denmark	0.0292201	0.0192185	0.0228227	0.0149971	0.0384799	0.0340814	0.0093435
Hordorf	HDC001	Germany	0.00886841	0.00380371	0.00407979	0.00445239	0.0033473	0.00358313	0.0124304
Serrahn	HHC001	Germany	0.0392774	0.0297498	0.0198497	0.0251757	0.0163572	0.0125227	0.0260437
Hohes Holz	HOC001	Germany	0.0237217	0.00302619	0.00910024	0.00524191	0.00948994	0.00369601	0.0201755
Jena	JEC001	Germany	0.0247517	0.00662147	0.0109219	0.0128224	0.00866771	0.00710262	0.0235555
Merzenhausen	MEBCK001	Germany	0.0080782	0.00333414	0.00385145	0.0034404	0.00432883	0.00387016	0.0102899
Olocau	OLC001	Spain	0.00882349	0.00412915	0.00405588	0.00230481	0.00547002	0.00221506	0.0104429
Petzenkirchen	PEC001	Austria	0.00233419	0.00457423	0.0067461	0.00622357	0.00921861	0.0087368	0.00598791
Rietholzbach	RIC001	Switzerland	0.00257534	0.00505989	0.00590992	0.0092478	0.0130375	0.0123273	0.00278326
Rollesbroich1	ROC001	Germany	0.00294974	0.00502477	0.0113372	0.0103681	0.0104602	0.0114481	0.00471049
Rollesbroich2	ROC002	Germany	0.00388502	0.00538417	0.0109141	0.0106934	0.010939	0.0119549	0.00593423
Schoeneseiffen	RUBCDKR001	Germany	0.0022254	0.00238924	0.00451952	0.00274675	0.00422631	0.0047729	0.00582907
Gevenich	RUBCK002	Germany	0.00659616	0.00520944	0.00582677	0.003561	0.00410423	0.00412857	0.00869898
Ruraue	RUBCK003	Germany	0.00344864	0.00899842	0.00854759	0.00256409	0.00338334	0.0034261	0.00432741
Wildenrath	RUBCK004	Germany	0.0259646	0.000841159	0.0029364	0.0124253	0.00855946	0.00320371	0.0184851
Heinsberg	RUC004	Germany	0.00725173	0.00738514	0.00495678	0.0023779	0.00258448	0.00315164	0.00441088
Kall	RUC005	Germany	0.00253778	0.00334654	0.00630896	0.00464799	0.00640138	0.0103756	0.00324392
Aachen	RUC006	Germany	0.00260741	0.0365823	0.0273951	0.0109236	0.0107468	0.0126746	0.00326152
Kleinhau1	RUC007	Germany	0.00282312	0.00360503	0.00423049	0.00335849	0.00451597	0.00495112	0.00817163
Saerheim	SAC001	Norway			0.0195871		0.0236203		0.0385236
Schaefertal1	SCC001	Germany	0.00796299	0.00732496	0.00512888	0.00395028	0.00609537	0.00429801	0.0205827
Schaefertal4	SCC004	Germany	0.0289159	0.0255898	0.0175854	0.0118988	0.0212607	0.0106385	0.0485382
Selhausen	SEC001	Germany	0.00289671	0.0124425	0.0112201	0.00395744	0.00463458	0.0049911	0.00427152
Toulouse	TOC001	France	0.0355598	0.0326148	0.0137994	0.0195228	0.0141898	0.00846447	0.0328396
Voulund	VOC001	Denmark	0.00333615	0.00951432	0.0108651	0.0147186	0.00168121	0.00277333	0.0493323
Wildacker	WAC001	Germany	0.0416876	0.0302042	0.0218516	0.0266492	0.0168372	0.0123294	0.0289415
Wuestebach1	WUC001	Germany	0.00558822	0.00932631	0.0194622	0.0158301	0.0183849	0.0191949	0.00436448
Wuestebach2	WUC002	Germany	0.00859154	0.011654	0.0216418	0.0179932	0.0215077	0.0217107	0.00731505
Baldry	AUS_SITE_001	Australia	0.00886431	0.00366813	0.00639623	0.0087334	0.00484123	0.00579341	0.0149588
Daly	AUS_SITE_002	Australia	0.0542997	0.0171596	0.0131845	0.0327477	0.0235255	0.0180948	0.0326123
Gnangara	AUS_SITE_003	Australia	0.0131288		0.00955806	0.0255059	0.0190047	0.0291731	0.0358469
Robson	AUS_SITE_006	Australia	0.0210787	0.00300044	0.00396783	0.00604723	0.00392594		0.0143622
Temora	AUS_SITE_007	Australia	0.00682163	0.00575616	0.00511837	0.00525681	0.00367991	0.0041635	0.00684089
Tullochgorum	AUS_SITE_008	Australia	0.0198524	0.00886051	0.0181439	0.00632746	0.0104374	0.0181545	0.0194224
Tumbarumba	AUS_SITE_009	Australia	0.0122621	0.0295162	0.0428646	0.0242617	0.0379461	0.0255959	0.00804009
Weany Creek	AUS_SITE_010	Australia	0.0115693	0.0026216	0.00865224	0.00445023	0.00790633	0.0049461	0.0052901
Yanco	AUS_SITE_011	Australia	0.00745604	0.00931283	0.00592013	0.00586219	0.0059584	0.00670458	0.00517069
Hamilton	AUS_SITE_015	Australia	0.00787237	0.0133448	0.00853888	0.0247345	0.0193555	0.0114237	0.0112753
Bishes	AUS_SITE_018	Australia	0.00801292	0.00106551	0.00732084	0.00159297	0.00483179	0.00147233	0.0190713

## Sheet: 5ubRMSE
CRNS site name	Station ID	Country	ERA5-Land	CFSv2	MERRA2	JRA55	GLDAS	CRA40	GLEAM
Manitou Forest Tower	USA_SITE_004	USA	0.0601993	0.0628187	0.0569202	0.0600873	0.0632371	0.0512176	0.049583
Marshall Colorado	USA_SITE_006	USA	0.044806	0.0559474	0.0511026	0.0542776	0.0596179	0.0433636	0.042944
Kendall	USA_SITE_010	USA	0.0418984	0.0484939	0.0449818	0.0492418	0.0422274	0.038836	0.0391961
Santa Rita Creosote	USA_SITE_011	USA	0.033743	0.0339817	0.0320005	0.0483049	0.0336072	0.0258238	0.0248866
SMAP-OK	USA_SITE_014	USA	0.0464864	0.0536527	0.0596278	0.0598408	0.0564107	0.0500759	0.049768
ARM-1	USA_SITE_015	USA	0.0477089	0.0500934	0.0525954	0.0548511	0.0506977	0.0500406	0.0539591
Iowa Validation Site	USA_SITE_016	USA	0.0714239	0.083744	0.0700123	0.0689649	0.0694008	0.0692139	0.0648561
San Pedro 2	USA_SITE_020	USA	0.0607673	0.0380637	0.0486092	0.0556754	0.0444385	0.0465366	0.0400586
Desert Chaparral UCI	USA_SITE_023	USA	0.0339812	0.0250867	0.0284367	0.0324501	0.0323673	0.0289453	0.0238269
Coastal Sage UCI	USA_SITE_024	USA	0.0442916	0.0529336	0.0612893	0.0720246	0.074218	0.0722986	0.0545622
Chestnut Ridge NOAA	USA_SITE_025	USA	0.0491904	0.0423014	0.0488952	0.0437891	0.0406106	0.0367593	0.0463273
Bondville	USA_SITE_026	USA	0.0555613	0.0553457	0.0477802	0.0374332	0.044576	0.0462741	0.0335065
Morgan Monroe	USA_SITE_027	USA	0.0450131	0.045523	0.0458433	0.0331053	0.0450246	0.0387912	0.0342983
Mozark	USA_SITE_028	USA	0.0453168	0.0438369	0.0375729	0.0501499	0.043361	0.035934	0.0447529
Neb Field 3	USA_SITE_029	USA	0.0502241	0.0578409	0.048371	0.0456521	0.0507101	0.0453268	0.0450828
Harvard Forest	USA_SITE_030	USA	0.0575148	0.0712716	0.0568616	0.0606439	0.0711855	0.0673977	0.0662418
Howland	USA_SITE_031	USA	0.0506277	0.0633032	0.050533	0.0522898	0.0537769	0.0640374	0.0548305
Tonzi Ranch	USA_SITE_032	USA	0.0498787	0.0616592	0.0734194	0.0784713	0.0762602	0.0679071	0.0621549
Soaproot	USA_SITE_033	USA	0.036138	0.0435543	0.0434727	0.0573814	0.037347	0.035378	0.0334663
P301	USA_SITE_034	USA	0.0311052	0.0240939	0.0211033	0.0243393	0.0247544	0.0275174	0.0314143
Wind River	USA_SITE_035	USA	0.0554271	0.031844	0.0445746	0.0347944	0.0379176	0.0345697	0.0355352
Hauser Farm South	USA_SITE_037	USA	0.0720333	0.0693745	0.0637019	0.064097	0.0593345	0.0702258	0.0616924
Metolius	USA_SITE_038	USA	0.0359961	0.0405517	0.0617219	0.0342663	0.0294232	0.0326702	0.0264779
Rosemount	USA_SITE_041	USA	0.055233	0.0673971	0.0564466	0.0407172	0.0494086	0.0549104	0.0413645
Park Falls	USA_SITE_042	USA	0.0296168	0.0327967	0.0352594	0.0331539	0.0341818	0.0306627	0.031438
UMBS	USA_SITE_043	USA	0.0252841	0.0296175	0.0313914		0.0282192		0.0251588
Daniel Forest	USA_SITE_046	USA	0.0635848	0.0778694	0.0855435	0.0741437	0.0756197	0.0661041	0.0727343
Tenderfoot Creek	USA_SITE_047	USA	0.0658142	0.0792978	0.0870233	0.0758376	0.0749435	0.0688814	0.0814897
Fort Peck	USA_SITE_048	USA	0.0399731	0.0383077	0.0465333	0.0528244	0.0395271	0.0385259	0.0370658
JERC	USA_SITE_052	USA	0.0418639	0.0387798	0.048614	0.0337449	0.0350396	0.0275207	0.0367782
Savannah River	USA_SITE_053	USA	0.0393298	0.0348917	0.0393213	0.024398	0.0265578	0.0206296	0.0320992
Freeman Ranch	USA_SITE_057	USA	0.0391178	0.0420325	0.0408548	0.0472392	0.0457883	0.0397548	0.0449309
Sevilleta New Grass	USA_SITE_058	USA	0.0407615	0.0338618	0.026819	0.0364332	0.0269332	0.0267863	0.0223516
Lucky Hills	USA_SITE_060	USA	0.0802443	0.0830437	0.0735801	0.0803055	0.0757704	0.072108	0.0721634
Flag Wildfire	USA_SITE_061	USA	0.0444496	0.0580927	0.0615594	0.0604753	0.0572091	0.0510278	0.0458298
Flag Ponderosa Pine	USA_SITE_062	USA	0.0526032	0.0751058	0.0752133	0.0741741	0.0673849	0.0607743	0.0574684
Beltsville	USA_SITE_065	USA	0.0573891	0.0529346	0.0525851	0.0724709	0.0741203	0.0768782	0.0623784
Jornada Mixed Shrubland	USA_SITE_072	USA	0.0450237	0.0374348	0.0327318	0.0419788	0.0381136	0.0274853	0.0239303
AliceHolt	ALIC1	UK	0.0442693	0.0294145	0.0277209	0.0367233	0.0335599	0.0274221	0.02983
Balruddery	BALRD	UK	0.024507	0.0365641	0.0442845	0.0354939	0.0348626	0.0392539	0.0284561
BickleyHall	BICKL	UK	0.0467611	0.0523546	0.0702103	0.0645203	0.0595543	0.0495	0.0625961
BunnyPark	BUNNY	UK	0.0222829	0.0340625	0.0475767	0.0372407	0.0409556	0.0396321	0.0335407
Cardington	CARDT	UK	0.0431629	0.0416391	0.0473918	0.0528177	0.0522398	0.0376788	0.0471206
ChimneyMeadows	CHIMN	UK	0.0468458	0.0372896	0.0404975	0.0470313	0.0402462	0.0344305	0.0437418
ChobhamCommon	CHOBH	UK	0.0837474	0.0785893	0.0763981	0.0877183	0.0929217	0.0698507	0.0834752
Cochno	COCHN	UK	0.0613074	0.0447652	0.0499831	0.0567457	0.0511217	0.0450275	0.0469112
CocklePark	COCLP	UK	0.062343	0.0516388	0.060715		0.0532311		0.0431108
Crichton	CRICH	UK	0.05702	0.0534011	0.0618757	0.064812	0.0610769	0.0589704	0.0649884
CwmGarw	CGARW	UK	0.0590112	0.0546131	0.0679551	0.0723895	0.0648181		0.0676867
EasterBush	EASTB	UK	0.0316311	0.0360898	0.0458568	0.040872	0.0380745	0.0350578	0.0511759
Elmsett	ELMST	UK	0.0288051	0.036475	0.0547396		0.0402889	0.0375601	0.0382198
Euston	EUSTN	UK	0.0263895	0.0348006	0.049553	0.0440041	0.0403501	0.0404663	0.0384806
Fincham	FINCH	UK	0.0356659	0.0324539	0.0393023	0.0376934	0.0350307	0.0377341	0.032971
GisburnForest	GISBN	UK	0.0543583	0.0559596	0.0612619	0.0586519	0.058764	0.0569207	0.0590151
Glensaugh	GLENS	UK	0.0735025	0.0771141	0.0793599	0.0755251	0.0756938	0.0855893	0.0755322
Glenwherry	GLENW	UK	0.0877409		0.0912312	0.100476	0.0917671	0.0862318	0.0907418
Hadlow	HADLW	UK	0.0350394	0.040097	0.0520853	0.0439992	0.04673	0.0426983	0.0509362
HartwoodHome	HARTW	UK	0.0595017	0.0571607	0.06429	0.0651726	0.0597758	0.0573064	0.0624682
HarwoodForest	HARWD	UK	0.130094	0.134901	0.143712	0.138149	0.13625	0.132645	0.139208
HenfaesFarm	HENFS	UK	0.0547473	0.0692317	0.0633626	0.0659812	0.0650196		0.0628384
Heytesbury	HYBRY	UK	0.0673449	0.0490442	0.062839	0.0594318	0.0581523	0.0525935	0.0627176
Hillsborough	HILLB	UK	0.0541189	0.0488972	0.052353	0.0544001	0.0546647	0.0462287	0.0526681
HollinHill	HOLLN	UK	0.0515214	0.0596273	0.0703908	0.0694387	0.06029	0.0552497	0.0605803
Loddington	LODTN	UK	0.0628042	0.0539717	0.0703079	0.0623853	0.0595265	0.053666	0.0570738
LullingtonHeath	LULLN	UK	0.0526823	0.0437841	0.0656978	0.0585282	0.0485619		0.0575612
MoorHouse	MOORH	UK	0.100072	0.100746	0.100998	0.100017	0.100052	0.0959247	0.0969418
Morley	MORLY	UK	0.0337494	0.0299909	0.0454862	0.035534	0.0350566		0.0337444
NorthWyke	NWYKE	UK	0.0615339	0.0733347	0.068452	0.07844	0.058673	0.0632708	0.0717673
Plynlimon	PLYNL	UK	0.0693861		0.0719825		0.0683886	0.0639942	0.0641239
PortonDown	PORTN	UK	0.0544549	0.040433	0.0579107	0.0522852	0.0498263	0.0457655	0.0503387
Redhill	REDHL	UK	0.0373128	0.0276032	0.0426771	0.0343103	0.0363415	0.0291305	0.0378933
Redmere	RDMER	UK	0.0828462	0.0769705	0.0851064	0.0808097	0.083043	0.0910709	0.0776449
Riseholme	RISEH	UK	0.0428069	0.0379281	0.0500931	0.0399263	0.0400723	0.0391416	0.0376159
Rothamsted	ROTHD	UK	0.0335699	0.0372441	0.0457585	0.0411982	0.0416448	0.0369798	0.0350972
Sheepdrove	SHEEP	UK	0.0437531	0.0464461	0.0525337	0.0507452	0.0499035	0.046065	0.0505258
Sourhope	SOURH	UK	0.0797208	0.0866133	0.0895034	0.0914134	0.0897755	0.0838035	0.0938288
SpenFarm	SPENF	UK	0.0381472	0.0355879	0.0476636	0.0376262	0.0394209	0.0366209	0.036889
Stiperstones	STIPS	UK	0.0762289	0.0822709	0.0911153	0.0886644	0.0894125	0.0791492	0.0924077
Stoughton	STGHT	UK	0.0283483	0.0320905	0.0467298	0.0376812	0.0390493	0.0359686	0.0341344
TadhamMoor	TADHM	UK	0.101133	0.102038	0.103172	0.10456	0.103884	0.102821	0.10107
TheLizard	LIZRD	UK	0.0592349		0.069517		0.0666273		0.0606172
Waddesdon	WADDN	UK	0.0602142	0.0563258	0.0560214	0.0657789	0.0566323	0.0496474	0.0597748
Writtle	WRTTL	UK	0.0657963	0.0668041	0.0872601	0.0783858	0.081442	0.0699682	0.0715182
Aas	AAC001	Norway	0.0460854	0.0475705	0.0651593	0.0602991	0.0509661	0.0553451	0.0585662
Acheleschwaig	ACC001	Germany	0.0404807	0.0455408	0.0470346	0.0489877	0.0486206	0.0404592	0.0491487
Agia	AGCK003	Greece	0.0566623	0.0714803	0.072157	0.0688269	0.0706455	0.0656535	0.067942
Alento1	ALC001	Italy	0.030292		0.0368454	0.0332407	0.037861		0.039847
Alento2	ALC002	Italy	0.0375059		0.0465265	0.0386521	0.042931		0.0480892
Calderona1	CAC001	Spain	0.0381848	0.030424	0.0327104	0.0451943	0.0380166		0.0437484
Crolles	CRC001	France	0.0464015	0.0524688	0.0589103	0.05172	0.0507659	0.0499542	0.0517478
Cunnersdorf	CUC001	Germany	0.053896	0.0631707	0.0753682	0.0643529	0.0656083	0.0626601	0.0584871
Derlo	DEC001	Poland	0.0305932	0.0357504	0.040255	0.0459434	0.0367888	0.0363676	0.0356693
Fendt	FEC001	Germany	0.0388369	0.0400043	0.0383812	0.0442667	0.0376291	0.039516	0.0440571
Fuerstensee	FSC001	Germany	0.0302194	0.0395584	0.0516081	0.0429332	0.0436176	0.0420783	0.0380561
Grosses Bruch	GBC001	Germany	0.0419177	0.0395906	0.0513996	0.0458052	0.04736	0.0459656	0.0415822
Gludsted	GLC001	Denmark	0.0671211	0.0762288	0.0868851	0.0817117	0.0771137	0.0691048	0.0750365
Harrild	HAC001	Denmark	0.0884933	0.0933511	0.10747	0.0948515	0.0937117	0.0941794	0.0935996
Hordorf	HDC001	Germany	0.0549248	0.052547	0.0621099	0.0600348	0.0553737	0.0591139	0.054356
Serrahn	HHC001	Germany	0.0302867	0.0335643	0.0400602	0.0344206	0.0328431	0.0289957	0.0299039
Hohes Holz	HOC001	Germany	0.0433416	0.0391921	0.036196	0.0358251	0.0359402	0.034826	0.0319073
Jena	JEC001	Germany	0.0268641	0.0287379	0.0321624	0.031905	0.0269193	0.0299803	0.0255696
Merzenhausen	MEBCK001	Germany	0.0299042	0.0421508	0.0568825	0.0455503	0.0528339	0.0533928	0.0456808
Olocau	OLC001	Spain	0.0424723	0.0346896	0.0336426	0.0477902	0.0400577	0.0333498	0.0407309
Petzenkirchen	PEC001	Austria	0.0480664	0.0581771	0.0642422	0.0628012	0.0554702	0.0580049	0.0638975
Rietholzbach	RIC001	Switzerland	0.0452208	0.051193	0.0553741	0.054832	0.051764	0.0512547	0.0524917
Rollesbroich1	ROC001	Germany	0.0525172	0.0642991	0.0703786	0.0630071	0.0649472	0.0657731	0.0675167
Rollesbroich2	ROC002	Germany	0.061427	0.0693562	0.0724831	0.0703731	0.0724499	0.0737094	0.0752063
Schoeneseiffen	RUBCDKR001	Germany	0.0346702	0.0469366	0.0552622	0.0470652	0.051409	0.0538173	0.0546514
Gevenich	RUBCK002	Germany	0.0366383	0.0495662	0.0643624	0.0549898	0.0597133	0.0623441	0.056479
Ruraue	RUBCK003	Germany	0.0406944	0.0433263	0.0585302	0.0499825	0.0578126	0.0566502	0.0498095
Wildenrath	RUBCK004	Germany	0.0275433	0.0282615	0.0383395	0.032393	0.0348128	0.0315172	0.0322705
Heinsberg	RUC004	Germany	0.0359076	0.040974	0.0539524	0.0451569	0.0508295	0.0439018	0.0451754
Kall	RUC005	Germany	0.0452967	0.0576938	0.0652105	0.0554374	0.0551865	0.0576177	0.0511003
Aachen	RUC006	Germany	0.036885	0.0466891	0.0595378	0.0499926	0.0547412	0.0548551	0.0487238
Kleinhau1	RUC007	Germany	0.0394835	0.0534828	0.0607159	0.0531462	0.0611906	0.062864	0.0620221
Saerheim	SAC001	Norway			0.0558265		0.0547742		0.0535735
Schaefertal1	SCC001	Germany	0.0444182	0.0598054	0.063709	0.0626726	0.0604374	0.065565	0.0573504
Schaefertal4	SCC004	Germany	0.0354083	0.0440589	0.0442656	0.0562052	0.0406789	0.0522515	0.0401512
Selhausen	SEC001	Germany	0.048796	0.0567405	0.0676893	0.059084	0.0639462	0.0649634	0.0591914
Toulouse	TOC001	France	0.0271559	0.034178	0.0378294	0.0406939	0.0366053	0.0395232	0.0334781
Voulund	VOC001	Denmark	0.03269	0.0329624	0.0534371	0.0345718	0.0344798	0.0404518	0.0371014
Wildacker	WAC001	Germany	0.0329468	0.0277968	0.0317371	0.0343728	0.0259909	0.027139	0.0261053
Wuestebach1	WUC001	Germany	0.0519645	0.0610838	0.0660114	0.055449	0.0557945	0.0548577	0.0575671
Wuestebach2	WUC002	Germany	0.0739703	0.0835979	0.084116	0.0818371	0.078301	0.0803475	0.080647
Baldry	AUS_SITE_001	Australia	0.0877242	0.0604834	0.0719115	0.0779574	0.0683923	0.0659016	0.0654614
Daly	AUS_SITE_002	Australia	0.0808099	0.0560577	0.0616716	0.0691111	0.0561697	0.0612742	0.0575604
Gnangara	AUS_SITE_003	Australia	0.0600755		0.0202701	0.0377662	0.0297878	0.0203954	0.0495754
Robson	AUS_SITE_006	Australia	0.0623171	0.0529172	0.0571448	0.0541217	0.0476943		0.0406848
Temora	AUS_SITE_007	Australia	0.0825639	0.061888	0.0689802	0.0724688	0.0592452	0.0643554	0.0618267
Tullochgorum	AUS_SITE_008	Australia	0.0867445	0.0752783	0.0593003	0.0790394	0.0717653	0.0673226	0.0656806
Tumbarumba	AUS_SITE_009	Australia	0.0806719	0.070839	0.0832929	0.0844784	0.0820368	0.0818817	0.0830254
Weany Creek	AUS_SITE_010	Australia	0.0707347	0.0432128	0.0507778	0.0553966	0.0462375	0.0496722	0.0421957
Yanco	AUS_SITE_011	Australia	0.0838682	0.0714251	0.0768353	0.0747604	0.076281	0.0727036	0.0717629
Hamilton	AUS_SITE_015	Australia	0.0791007	0.0944443	0.0817905	0.097545	0.0892132	0.094743	0.0786026
Bishes	AUS_SITE_018	Australia	0.0357575	0.0320042	0.0388576	0.031573	0.0356102	0.0379262	0.0320772

## Sheet: 6Bias
CRNS site name	Station ID	Country	ERA5-Land	CFSv2	MERRA2	JRA55	GLDAS	CRA40	GLEAM
Manitou Forest Tower	USA_SITE_004	USA	0.095135	0.146385	0.0308534	0.0385921	-0.0140023	0.00299196	0.0837327
Marshall Colorado	USA_SITE_006	USA	0.0910871	0.0169206	0.00356711	-0.0139456	0.130547	0.0269603	0.0609435
Kendall	USA_SITE_010	USA	0.119537	0.130937	0.0443093	0.018574	0.0436706	0.0464713	0.0393154
Santa Rita Creosote	USA_SITE_011	USA	0.0892158	0.124852	0.0977567	0.0798342	0.115592	0.11026	0.110741
SMAP-OK	USA_SITE_014	USA	0.0808483	0.0390839	-0.00372032	0.0963144	0.0459993	0.0209665	0.126739
ARM-1	USA_SITE_015	USA	0.116254	0.0946683	0.0521808	0.166988	0.0998934	0.0783473	0.201235
Iowa Validation Site	USA_SITE_016	USA	0.0247841	-0.0180459	-0.0621625	0.0129435	-0.022288	-0.055431	0.103507
San Pedro 2	USA_SITE_020	USA	-0.00552931	0.127953	0.041507	0.0224622	0.0460371	0.0454409	0.0509905
Desert Chaparral UCI	USA_SITE_023	USA	0.125089	0.16133	0.104621	0.0894151	0.100986	0.0546362	0.100813
Coastal Sage UCI	USA_SITE_024	USA	0.0365079	0.111389	0.0670894	-0.0061604	0.121865	0.0757593	0.102844
Chestnut Ridge NOAA	USA_SITE_025	USA	0.122951	0.0290171	0.0142993	-0.00640555	-0.0174815	-0.0140305	0.0850442
Bondville	USA_SITE_026	USA	-0.0845067	-0.117955	-0.0974196	-0.108441	-0.0928743	-0.123445	-0.0249834
Morgan Monroe	USA_SITE_027	USA	-0.100821	-0.137884	-0.0943155	-0.122559	-0.107809	-0.110532	-0.0695704
Mozark	USA_SITE_028	USA	0.0434526	0.0309316	0.027255	0.0220475	0.00241765	-0.00417917	0.0685393
Neb Field 3	USA_SITE_029	USA	-0.0155161	-0.0625984	-0.0560069	-0.0141614	-0.0283819	-0.0595542	0.0556853
Harvard Forest	USA_SITE_030	USA	-0.238658	-0.214959	-0.25376	-0.156629	-0.186134	-0.184648	-0.171454
Howland	USA_SITE_031	USA	-0.198422	-0.195243	-0.168212	-0.121951	-0.117545	-0.164581	-0.131241
Tonzi Ranch	USA_SITE_032	USA	0.0218125	0.0476685	-0.00581494	-0.0158076	0.0229118	-0.0172247	0.0619267
Soaproot	USA_SITE_033	USA	0.120852	0.0648693	0.0773845	0.0268582	0.00794872	0.0270482	0.110827
P301	USA_SITE_034	USA	0.237567	0.175331	0.13523	0.095807	0.0717859	0.0801991	0.185353
Wind River	USA_SITE_035	USA	-0.000392233	0.000446729	-0.0494508	-0.0480863	-0.0935143	-0.0768005	0.0733276
Hauser Farm South	USA_SITE_037	USA	0.218862	0.130843	0.107185	0.0453309	0.064382	0.0921451	0.0752447
Metolius	USA_SITE_038	USA	0.00610346	0.0184982	0.0880763	0.0711719	0.0660053	0.0826107	0.128645
Rosemount	USA_SITE_041	USA	0.0200759	0.0487974	0.0356776	0.0824411	0.0602248	0.0189732	0.147464
Park Falls	USA_SITE_042	USA	0.054775	0.094961	0.0396973	0.110046	0.129307	0.110778	0.12382
UMBS	USA_SITE_043	USA	0.0963367	0.0901165	0.0891924		-0.00492383		0.105018
Daniel Forest	USA_SITE_046	USA	0.116477	0.123591	0.0761339	0.055343	0.0269922	0.0167293	0.110169
Tenderfoot Creek	USA_SITE_047	USA	0.0908844	0.0944648	0.0283149	0.0406521	-0.0180456	-0.00727868	0.0363239
Fort Peck	USA_SITE_048	USA	0.0959543	0.114384	0.0327074	0.0630376	0.028497	-0.0194797	0.115688
JERC	USA_SITE_052	USA	0.0782094	0.214653	0.143268	0.194303	0.01334	0.0841775	0.230771
Savannah River	USA_SITE_053	USA	0.097762	0.0920403	0.123636	0.208654	0.0323937	0.101658	0.227347
Freeman Ranch	USA_SITE_057	USA	0.117271	0.0385054	0.0419601	0.00786636	0.0216072	-0.0244035	0.0857684
Sevilleta New Grass	USA_SITE_058	USA	0.134774	0.176284	0.105444	0.0955279	0.0426676	0.0645259	0.0926962
Lucky Hills	USA_SITE_060	USA	0.0167729	0.158398	0.0689673	0.033116	0.0738285	0.0761465	0.083848
Flag Wildfire	USA_SITE_061	USA	0.0638124	0.0669322	-0.000250249	-0.0470842	-0.0273319	-0.0192728	0.0643454
Flag Ponderosa Pine	USA_SITE_062	USA	0.0282082	0.0323095	-0.0356638	-0.0790851	-0.060623	-0.0543081	0.0335643
Beltsville	USA_SITE_065	USA	0.0682622	-0.0200715	-0.0114074	0.0202077	0.0353642	0.0110458	0.108167
Jornada Mixed Shrubland	USA_SITE_072	USA	0.128433	0.183933	0.0740349	0.0958407	0.0853465	0.0882439	0.0704163
AliceHolt	ALIC1	UK	-0.109554	-0.0473406	-0.0273193	-0.0543232	-0.109818	-0.095421	-0.0405072
Balruddery	BALRD	UK	0.046016	0.00502348	0.0209776	-0.00927602	-0.0241547	-0.0286674	-0.135068
BickleyHall	BICKL	UK	0.0394547	-0.00743637	0.00738492	-0.00636498	-0.0447148	-0.0654526	0.0160912
BunnyPark	BUNNY	UK	0.138631	0.14534	0.131973	0.0975263	0.0873746	0.0418197	0.149213
Cardington	CARDT	UK	0.218438	0.128169	0.0974104	0.0770557	0.115276	0.0618255	0.139544
ChimneyMeadows	CHIMN	UK	0.0226521	-0.0260245	-0.00840262	-0.0462104	-0.041376	-0.0517696	0.0484279
ChobhamCommon	CHOBH	UK	-0.167192	-0.214411	-0.219235	-0.239906	-0.289878	-0.274413	-0.238578
Cochno	COCHN	UK	-0.108	-0.0417884	-0.00142011	-0.0688188	-0.106808	-0.0457746	-0.0445879
CocklePark	COCLP	UK	-0.0663333	-0.104968	-0.0425651		-0.112984		-0.0503338
Crichton	CRICH	UK	-0.0663492	-0.157084	-0.0571707	-0.106319	-0.143333	-0.132395	-0.182681
CwmGarw	CGARW	UK	-0.114302	-0.215368	-0.140031	-0.158087	-0.208401		-0.0927104
EasterBush	EASTB	UK	-0.0614977	-0.0496334	-0.0244399	-0.0384239	-0.0627034	-0.0543404	0.0114765
Elmsett	ELMST	UK	0.00160571	-0.152264	-0.0969131		-0.0680788	-0.130762	-4.57393e-05
Euston	EUSTN	UK	0.0719022	0.0671655	0.114254	0.148926	0.0952821	0.0896478	0.14741
Fincham	FINCH	UK	0.074767	-0.0400242	0.00427073	0.0414484	-0.0191494	-0.0280481	0.0414933
GisburnForest	GISBN	UK	-0.196525	-0.231164	-0.215799	-0.257194	-0.294831	-0.296325	-0.279475
Glensaugh	GLENS	UK	-0.267544	-0.20253	-0.291644	-0.208211	-0.237583	-0.240839	-0.183593
Glenwherry	GLENW	UK	-0.204454		-0.186396	-0.25497	-0.2232	-0.232042	-0.172534
Hadlow	HADLW	UK	-0.00181286	-0.0339047	-0.00530984	-0.0830245	-0.0885783	-0.0950317	-0.0276828
HartwoodHome	HARTW	UK	-0.0550049	-0.207461	-0.162542	-0.205513	-0.179314	-0.23373	-0.0914484
HarwoodForest	HARWD	UK	-0.380039	-0.404222	-0.384975	-0.439984	-0.465296	-0.458831	-0.487276
HenfaesFarm	HENFS	UK	-0.137378	-0.12663	-0.1022	-0.135027	-0.153054		-0.0424872
Heytesbury	HYBRY	UK	0.0359806	-0.0602645	0.00493041	-0.0383136	-0.00472585	-0.0432347	0.00248958
Hillsborough	HILLB	UK	-0.0636147	-0.0576141	-0.0125192	-0.0906121	-0.0382921	-0.0991063	-0.0298554
HollinHill	HOLLN	UK	-0.062623	-0.0583027	-0.108576	-0.107146	-0.156954	-0.142514	-0.0341651
Loddington	LODTN	UK	-0.161471	-0.128072	-0.155265	-0.18976	-0.151937	-0.19151	-0.09758
LullingtonHeath	LULLN	UK	0.106375	-0.0150436	-0.0161605	-0.0515089	-0.0226605		0.0251348
MoorHouse	MOORH	UK	-0.28814	-0.23227	-0.224373	-0.288599	-0.32112	-0.313914	-0.306186
Morley	MORLY	UK	0.202364	-0.025194	0.0256192	0.0451019	0.00382911		0.047641
NorthWyke	NWYKE	UK	-0.119184	-0.111394	-0.12079	-0.140377	-0.193958	-0.170647	-0.0542363
Plynlimon	PLYNL	UK	-0.100596		-0.194504		-0.255207	-0.260611	-0.121559
PortonDown	PORTN	UK	0.0295857	-0.0525795	-0.00690817	-0.0520591	-0.0486634	-0.0511989	-0.0160372
Redhill	REDHL	UK	0.0876715	0.0674686	0.0538636	0.00879252	0.018571	-0.00860369	0.121709
Redmere	RDMER	UK	-0.050372	-0.444935	-0.390059	-0.364444	-0.406671	-0.399906	-0.415788
Riseholme	RISEH	UK	0.00321001	0.0289467	0.00589625	-0.0319908	0.0111454	-0.061587	0.0597663
Rothamsted	ROTHD	UK	0.0752668	0.0626768	0.0322053	0.0110257	0.0307199	0.0128831	0.0365721
Sheepdrove	SHEEP	UK	0.0927461	-0.031885	-0.0148972	-0.0516359	-0.0479017	-0.0588303	0.0422991
Sourhope	SOURH	UK	-0.152956	-0.161706	-0.109164	-0.178756	-0.191967	-0.196133	-0.241349
SpenFarm	SPENF	UK	0.0640612	0.0295155	0.00781497	0.0012333	-0.0174312	-0.0300481	0.0532389
Stiperstones	STIPS	UK	-0.166759	-0.217002	-0.197131	-0.208119	-0.244235	-0.262431	-0.110225
Stoughton	STGHT	UK	0.123978	0.0371324	0.0146631	-0.0236294	-0.0341573	-0.0773218	0.0404098
TadhamMoor	TADHM	UK	-0.260369	-0.365997	-0.301109	-0.331122	-0.325509	-0.369838	-0.245594
TheLizard	LIZRD	UK	-0.184444		-0.226041		-0.295396		-0.172968
Waddesdon	WADDN	UK	0.0709433	-0.0267212	-0.0407136	-0.0745655	-0.0696764	-0.104083	0.00364856
Writtle	WRTTL	UK	0.0907288	-0.0183007	-0.0380602	-0.0704093	-0.0194068	-0.0508422	0.0183054
Aas	AAC001	Norway	-0.0015836	-0.0298638	0.055325	0.0972571	0.0338052	0.0377782	0.143785
Acheleschwaig	ACC001	Germany	0.0388714	0.0288534	0.0110786	-0.0157388	-0.0452415	-0.058224	0.0535112
Agia	AGCK003	Greece	0.0671371	0.142713	0.0213255	0.0189136	0.0221953	-0.0261571	0.0816168
Alento1	ALC001	Italy	0.0788687		0.0284662	-0.00580505	0.00362232		0.0409312
Alento2	ALC002	Italy	0.0825495		0.0372899	0.00800429	0.0128514		0.0519394
Calderona1	CAC001	Spain	0.0218115	0.00555878	0.00277048	-0.0431781	0.00727821		0.0346236
Crolles	CRC001	France	0.110335	-0.0250145	0.0192078	-0.000650261	0.0670012	-0.00593509	0.0816414
Cunnersdorf	CUC001	Germany	0.111461	0.07277	0.0464747	0.0315403	0.0537484	-0.0019722	0.0881363
Derlo	DEC001	Poland	0.145653	0.046437	0.0271528	0.132663	0.0581431	0.042747	0.109259
Fendt	FEC001	Germany	-0.0194664	-0.0383335	-0.0653083	-0.0827946	-0.109824	-0.0987448	-0.0020157
Fuerstensee	FSC001	Germany	0.191144	0.163215	0.127091	0.145759	0.113049	0.0955699	0.154542
Grosses Bruch	GBC001	Germany	0.0941668	-0.0204139	0.0294383	0.00546725	0.0320334	-0.00838809	0.0810949
Gludsted	GLC001	Denmark	-0.0615856	-0.00750052	-0.0225791	0.00499331	-0.0833349	-0.0775426	0.104484
Harrild	HAC001	Denmark	-0.146262	-0.102508	-0.106198	-0.0774873	-0.172342	-0.158794	0.0242187
Hordorf	HDC001	Germany	0.0765082	-0.0323142	0.0149833	-0.0291616	0.01682	-0.00952901	0.0973533
Serrahn	HHC001	Germany	0.195859	0.169187	0.135078	0.154893	0.12361	0.108086	0.158588
Hohes Holz	HOC001	Germany	0.147798	0.0386119	0.0882649	0.0629211	0.0905474	0.049837	0.138412
Jena	JEC001	Germany	0.155019	0.0761351	0.0994419	0.108654	0.0891285	0.0787708	0.151336
Merzenhausen	MEBCK001	Germany	0.0847598	-0.0394719	-0.0248373	0.0369628	0.0392214	0.0319424	0.0905751
Olocau	OLC001	Spain	0.0837892	0.0540969	0.0540805	0.00471336	0.0621797	0.0332188	0.0937274
Petzenkirchen	PEC001	Austria	0.00499729	-0.0345161	-0.0511968	-0.0477657	-0.0783787	-0.0733071	-0.04367
Rietholzbach	RIC001	Switzerland	-0.0230533	-0.0494015	-0.0533404	-0.0790112	-0.101781	-0.0984966	0.00541176
Rollesbroich1	ROC001	Germany	-0.013879	-0.0298633	-0.0799108	-0.0799972	-0.0790157	-0.0844006	0.012392
Rollesbroich2	ROC002	Germany	-0.0106406	-0.0239954	-0.0752487	-0.0757826	-0.0754461	-0.0807713	0.016747
Schoeneseiffen	RUBCDKR001	Germany	0.0320017	0.0136943	-0.0383075	-0.023086	-0.0398124	-0.0433401	0.0533302
Gevenich	RUBCK002	Germany	0.0724861	-0.0524732	-0.0410563	0.0231976	0.0232323	0.015591	0.0742305
Ruraue	RUBCK003	Germany	0.0423457	-0.0843912	-0.0715748	-0.00816537	-0.00649262	-0.0147626	0.0429796
Wildenrath	RUBCK004	Germany	0.158765	0.00653682	0.0383015	0.10666	0.0857202	0.0470184	0.132076
Heinsberg	RUC004	Germany	0.0772191	-0.0755435	-0.0452422	0.0184231	0.00129484	-0.0349986	0.04869
Kall	RUC005	Germany	0.0220617	0.00437745	-0.045366	-0.0396962	-0.0579389	-0.084006	0.0251717
Aachen	RUC006	Germany	-0.035318	-0.185481	-0.15444	-0.091789	-0.0880407	-0.0983185	-0.0298043
Kleinhau1	RUC007	Germany	0.035568	0.0273181	-0.0233711	-0.0231434	-0.0278183	-0.0316471	0.0657809
Saerheim	SAC001	Norway			0.128348		0.143606		0.188828
Schaefertal1	SCC001	Germany	0.0774021	0.061239	0.0327452	0.00495505	0.0494437	-0.001263	0.131512
Schaefertal4	SCC004	Germany	0.166321	0.153784	0.125007	0.0934945	0.140024	0.0889356	0.216626
Selhausen	SEC001	Germany	0.0227353	-0.0960454	-0.0814903	-0.0216409	-0.0234007	-0.0278039	0.0277438
Toulouse	TOC001	France	0.186609	0.177334	0.111217	0.133671	0.113361	0.0830869	0.1781
Voulund	VOC001	Denmark	0.0476226	0.0918053	0.0895022	0.116292	0.022199	0.0337283	0.218989
Wildacker	WAC001	Germany	0.201501	0.171557	0.144377	0.159588	0.12713	0.107672	0.168108
Wuestebach1	WUC001	Germany	-0.0537488	-0.0748097	-0.122908	-0.112945	-0.123584	-0.127227	-0.0324309
Wuestebach2	WUC002	Germany	-0.0558842	-0.0683326	-0.120707	-0.1063	-0.124017	-0.123526	-0.0285448
Baldry	AUS_SITE_001	Australia	0.0342921	0.00364616	0.0350683	0.0515918	0.0129645	0.0381385	0.103333
Daly	AUS_SITE_002	Australia	0.218566	0.118398	0.0968616	0.16725	0.142728	0.119755	0.171172
Gnangara	AUS_SITE_003	Australia	0.0975771		0.0956418	0.155178	0.134602	0.16958	0.18273
Robson	AUS_SITE_006	Australia	0.131135	0.0141776	0.0265184	-0.0558472	-0.0406428		0.112727
Temora	AUS_SITE_007	Australia	0.00278022	-0.0439053	-0.0190296	-0.00270529	-0.0130926	-0.00486447	0.0549544
Tullochgorum	AUS_SITE_008	Australia	0.111041	0.0565282	0.120948	-0.0090651	0.0727234	0.11672	0.122922
Tumbarumba	AUS_SITE_009	Australia	-0.0758702	-0.156524	-0.18955	-0.130872	-0.176687	-0.137454	-0.0338995
Weany Creek	AUS_SITE_010	Australia	0.0810386	0.0274729	0.0779394	0.0371791	0.0759539	0.049794	0.0592462
Yanco	AUS_SITE_011	Australia	-0.0205921	-0.0649049	-0.00424931	-0.0165703	-0.0118814	-0.0376856	-0.00470751
Hamilton	AUS_SITE_015	Australia	-0.0402287	-0.066552	-0.0430383	-0.123385	-0.106772	-0.0495143	-0.071413
Bishes	AUS_SITE_018	Australia	0.0820676	0.00646988	0.0762354	0.0244277	0.0597032	0.00589999	0.134324

## Sheet: DataLength
CRNS site name	Station ID	Country	ERA5-Land	CFSv2	MERRA2	JRA55	GLDAS	CRA40	GLEAM
Manitou Forest Tower	USA_SITE_004	USA	2055	2055	2055	2055	2055	2038	2055
Marshall Colorado	USA_SITE_006	USA	2224	2224	2224	2224	2224	2208	2224
Kendall	USA_SITE_010	USA	2232	2232	2232	2232	2232	2204	2232
Santa Rita Creosote	USA_SITE_011	USA	2456	2456	2456	2456	2456	2429	2456
SMAP-OK	USA_SITE_014	USA	2680	2680	2680	2680	2680	2651	2680
ARM-1	USA_SITE_015	USA	2835	2835	2835	2835	2835	2808	2835
Iowa Validation Site	USA_SITE_016	USA	2516	2516	2516	2516	2516	2492	2516
San Pedro 2	USA_SITE_020	USA	1175	1175	1175	1175	1175	1148	1175
Desert Chaparral UCI	USA_SITE_023	USA	2876	2876	2876	2876	2876	2845	2876
Coastal Sage UCI	USA_SITE_024	USA	3436	3436	3436	3436	3436	3404	3436
Chestnut Ridge NOAA	USA_SITE_025	USA	786	786	786	786	786	770	786
Bondville	USA_SITE_026	USA	2785	2785	2785	2785	2785	2757	2785
Morgan Monroe	USA_SITE_027	USA	788	788	788	788	788	773	788
Mozark	USA_SITE_028	USA	2929	2929	2929	2929	2929	2902	2929
Neb Field 3	USA_SITE_029	USA	2758	2758	2758	2758	2758	2733	2758
Harvard Forest	USA_SITE_030	USA	2282	2282	2282	2282	2282	2268	2282
Howland	USA_SITE_031	USA	2013	2013	2013	2013	2013	1998	2013
Tonzi Ranch	USA_SITE_032	USA	2831	2831	2831	2831	2831	2800	2831
Soaproot	USA_SITE_033	USA	1244	1244	1244	1244	1244	1226	1244
P301	USA_SITE_034	USA	1798	1798	1798	1798	1798	1782	1798
Wind River	USA_SITE_035	USA	1050	1050	1050	1050	1050	1034	1050
Hauser Farm South	USA_SITE_037	USA	2015	2015	2015	2015	2015	1993	2015
Metolius	USA_SITE_038	USA	1777	1777	1777	1777	1777	1759	1777
Rosemount	USA_SITE_041	USA	2111	2111	2111	2111	2111	2097	2111
Park Falls	USA_SITE_042	USA	1294	1294	1294	1294	1294	1278	1294
UMBS	USA_SITE_043	USA	1726	1726	1726	0	1726	0	1726
Daniel Forest	USA_SITE_046	USA	1204	1204	1204	1204	1204	1194	1204
Tenderfoot Creek	USA_SITE_047	USA	846	846	846	846	846	834	846
Fort Peck	USA_SITE_048	USA	1529	1529	1529	1529	1529	1510	1529
JERC	USA_SITE_052	USA	1708	1708	1708	1708	1708	1679	1708
Savannah River	USA_SITE_053	USA	1282	1282	1282	1282	1282	1253	1282
Freeman Ranch	USA_SITE_057	USA	2272	2272	2272	2272	2272	2243	2272
Sevilleta New Grass	USA_SITE_058	USA	1059	1059	1059	1059	1059	1033	1059
Lucky Hills	USA_SITE_060	USA	1100	1100	1100	1100	1100	1078	1100
Flag Wildfire	USA_SITE_061	USA	1535	1535	1535	1535	1535	1516	1535
Flag Ponderosa Pine	USA_SITE_062	USA	2298	2298	2298	2298	2298	2276	2298
Beltsville	USA_SITE_065	USA	1467	1467	1467	1467	1467	1444	1467
Jornada Mixed Shrubland	USA_SITE_072	USA	1085	1085	1085	1085	1085	1059	1085
AliceHolt	ALIC1	UK	1708	1708	1708	1708	1708	1703	1708
Balruddery	BALRD	UK	2029	2029	2029	2029	2029	2024	2029
BickleyHall	BICKL	UK	1745	1745	1745	1745	1745	1740	1745
BunnyPark	BUNNY	UK	1779	1779	1779	1779	1779	1774	1779
Cardington	CARDT	UK	1646	1646	1646	1646	1646	1641	1646
ChimneyMeadows	CHIMN	UK	2206	2206	2206	2206	2206	2200	2206
ChobhamCommon	CHOBH	UK	1761	1761	1761	1761	1761	1756	1761
Cochno	COCHN	UK	858	858	858	858	858	854	858
CocklePark	COCLP	UK	1585	1585	1585	0	1585	0	1585
Crichton	CRICH	UK	1763	1763	1763	1763	1763	1758	1763
CwmGarw	CGARW	UK	1220	1220	1220	1220	1220	0	1220
EasterBush	EASTB	UK	1900	1900	1900	1900	1900	1895	1900
Elmsett	ELMST	UK	1236	1236	1236	0	1236	1231	1236
Euston	EUSTN	UK	1313	1313	1313	1313	1313	1308	1313
Fincham	FINCH	UK	922	922	922	922	922	918	922
GisburnForest	GISBN	UK	1927	1927	1927	1927	1927	1922	1927
Glensaugh	GLENS	UK	1978	1978	1978	1978	1978	1973	1978
Glenwherry	GLENW	UK	1289	0	1289	1289	1289	1284	1289
Hadlow	HADLW	UK	1108	1108	1108	1108	1108	1103	1108
HartwoodHome	HARTW	UK	2008	2008	2008	2008	2008	2004	2008
HarwoodForest	HARWD	UK	1582	1582	1582	1582	1582	1577	1582
HenfaesFarm	HENFS	UK	1301	1301	1301	1301	1301	0	1301
Heytesbury	HYBRY	UK	817	817	817	817	817	813	817
Hillsborough	HILLB	UK	1294	1294	1294	1294	1294	1289	1294
HollinHill	HOLLN	UK	2064	2064	2064	2064	2064	2059	2064
Loddington	LODTN	UK	1313	1313	1313	1313	1313	1308	1313
LullingtonHeath	LULLN	UK	1754	1754	1754	1754	1754	0	1754
MoorHouse	MOORH	UK	1780	1780	1780	1780	1780	1775	1780
Morley	MORLY	UK	2056	2056	2056	2056	2056	0	2056
NorthWyke	NWYKE	UK	1846	1846	1846	1846	1846	1842	1846
Plynlimon	PLYNL	UK	1834	0	1834	0	1834	1829	1834
PortonDown	PORTN	UK	1715	1715	1715	1715	1715	1712	1715
Redhill	REDHL	UK	1393	1393	1393	1393	1393	1388	1393
Redmere	RDMER	UK	1302	1302	1302	1302	1302	1301	1302
Riseholme	RISEH	UK	1278	1278	1278	1278	1278	1273	1278
Rothamsted	ROTHD	UK	1983	1983	1983	1983	1983	1978	1983
Sheepdrove	SHEEP	UK	2232	2232	2232	2232	2232	2226	2232
Sourhope	SOURH	UK	1652	1652	1652	1652	1652	1650	1652
SpenFarm	SPENF	UK	1132	1132	1132	1132	1132	1127	1132
Stiperstones	STIPS	UK	1863	1863	1863	1863	1863	1858	1863
Stoughton	STGHT	UK	1589	1589	1589	1589	1589	1584	1589
TadhamMoor	TADHM	UK	1876	1876	1876	1876	1876	1871	1876
TheLizard	LIZRD	UK	1897	0	1897	0	1897	0	1897
Waddesdon	WADDN	UK	2203	2203	2203	2203	2203	2197	2203
Writtle	WRTTL	UK	909	909	909	909	909	905	909
Aas	AAC001	Norway	1186	1186	1186	1186	1186	1184	1186
Acheleschwaig	ACC001	Germany	807	807	807	807	807	805	807
Agia	AGCK003	Greece	1433	1433	1433	1433	1433	1429	1433
Alento1	ALC001	Italy	1526	0	1526	1526	1526	0	1526
Alento2	ALC002	Italy	1750	0	1750	1750	1750	0	1750
Calderona1	CAC001	Spain	1061	1061	1061	1061	1061	0	1061
Crolles	CRC001	France	811	811	811	811	811	809	811
Cunnersdorf	CUC001	Germany	1791	1791	1791	1791	1791	1785	1791
Derlo	DEC001	Poland	2251	2251	2251	2251	2251	2234	2251
Fendt	FEC001	Germany	1386	1386	1386	1386	1386	1384	1386
Fuerstensee	FSC001	Germany	1865	1865	1865	1865	1865	1865	1865
Grosses Bruch	GBC001	Germany	2305	2305	2305	2305	2305	2299	2305
Gludsted	GLC001	Denmark	2359	2359	2359	2359	2359	2334	2359
Harrild	HAC001	Denmark	2232	2232	2232	2232	2232	2227	2232
Hordorf	HDC001	Germany	1648	1648	1648	1648	1648	1642	1648
Serrahn	HHC001	Germany	1238	1238	1238	1238	1238	1234	1238
Hohes Holz	HOC001	Germany	2167	2167	2167	2167	2167	2161	2167
Jena	JEC001	Germany	872	872	872	872	872	871	872
Merzenhausen	MEBCK001	Germany	3056	3056	3056	3056	3056	3027	3056
Olocau	OLC001	Spain	1742	1742	1742	1742	1742	1736	1742
Petzenkirchen	PEC001	Austria	1990	1990	1990	1990	1990	1988	1990
Rietholzbach	RIC001	Switzerland	1965	1965	1965	1965	1965	1948	1965
Rollesbroich1	ROC001	Germany	2895	2895	2895	2895	2895	2868	2895
Rollesbroich2	ROC002	Germany	2553	2553	2553	2553	2553	2527	2553
Schoeneseiffen	RUBCDKR001	Germany	1643	1643	1643	1643	1643	1639	1643
Gevenich	RUBCK002	Germany	3013	3013	3013	3013	3013	2983	3013
Ruraue	RUBCK003	Germany	3002	3002	3002	3002	3002	2972	3002
Wildenrath	RUBCK004	Germany	2847	2847	2847	2847	2847	2818	2847
Heinsberg	RUC004	Germany	3107	3107	3107	3107	3107	3078	3107
Kall	RUC005	Germany	2797	2797	2797	2797	2797	2772	2797
Aachen	RUC006	Germany	3007	3007	3007	3007	3007	2978	3007
Kleinhau1	RUC007	Germany	1720	1720	1720	1720	1720	1717	1720
Saerheim	SAC001	Norway	0	0	1115	0	1115	0	1115
Schaefertal1	SCC001	Germany	1843	1843	1843	1843	1843	1821	1843
Schaefertal4	SCC004	Germany	2210	2210	2210	2210	2210	2188	2210
Selhausen	SEC001	Germany	1927	1927	1927	1927	1927	1922	1927
Toulouse	TOC001	France	1533	1533	1533	1533	1533	1505	1533
Voulund	VOC001	Denmark	2663	2663	2663	2663	2663	2637	2663
Wildacker	WAC001	Germany	1990	1990	1990	1990	1990	1980	1990
Wuestebach1	WUC001	Germany	2643	2643	2643	2643	2643	2624	2643
Wuestebach2	WUC002	Germany	1758	1758	1758	1758	1758	1754	1758
Baldry	AUS_SITE_001	Australia	1073	1073	1073	1073	1073	1045	1073
Daly	AUS_SITE_002	Australia	3719	3719	3719	3719	3719	3686	3719
Gnangara	AUS_SITE_003	Australia	2279	0	2279	2279	2279	2259	2279
Robson	AUS_SITE_006	Australia	3528	3528	3528	3528	3528	0	3528
Temora	AUS_SITE_007	Australia	2345	2345	2345	2345	2345	2327	2345
Tullochgorum	AUS_SITE_008	Australia	3231	3231	3231	3231	3231	3197	3231
Tumbarumba	AUS_SITE_009	Australia	2993	2993	2993	2993	2993	2960	2993
Weany Creek	AUS_SITE_010	Australia	3697	3697	3697	3697	3697	3664	3697
Yanco	AUS_SITE_011	Australia	3733	3733	3733	3733	3733	3699	3733
Hamilton	AUS_SITE_015	Australia	2157	2157	2157	2157	2157	2151	2157
Bishes	AUS_SITE_018	Australia	1650	1650	1650	1650	1650	1644	1650
